# Supplementary material for: Epigenetic estimates reveal a species-specific extension of lifespan in modern humans
Source: Research Square preprint supplement (doi:10.21203/rs.3.rs-8101134/v1), 2026-01-29
Supplement: Supplementary file 2 [file 1cdfd7856dda379632ba7048.xlsx]

## Sheet: Source Series Information
Table S4: Source series information for the study samples
Number	Series	Platform	Sample Size	Tissue/Organ	Ethnic Background	Database
1	GSE15745	Illumina HumanMethylation27 Beadchip	506	brain different parts	European	GEO
2	GSE17448	Illumina HumanMethylation27 Beadchip	16	mesenchymal stromal cell	European	GEO
3	GSE19711	Illumina HumanMethylation27 Beadchip	274	blood and blood cells	European	GEO
4	GSE20236	Illumina HumanMethylation27 Beadchip	93	blood and blood cells	European	GEO
5	GSE20242	Illumina HumanMethylation27 Beadchip	50	blood and blood cells	European	GEO
6	GSE22595	Illumina HumanMethylation27 Beadchip	15	skin or dermal	European	GEO
7	GSE23638	Illumina HumanMethylation27 Beadchip	24	blood and blood cells	European	GEO
8	GSE25892	Illumina HumanMethylation27 Beadchip	109	buccal or oral	European, African Descent, Hispanic, Asian	GEO
9	GSE26033-part1	Illumina HumanMethylation27 Beadchip	12	heart	European, African Descent, Others	GEO
10	GSE26033-part2	Illumina HumanMethylation27 Beadchip	12	kidney	European, African Descent, Others	GEO
11	GSE26033-part3	Illumina HumanMethylation27 Beadchip	12	liver	European, African Descent, Others	GEO
12	GSE26126	Illumina HumanMethylation27 Beadchip	86	prostate	European, African Descent, Others	GEO
13	GSE27097	Illumina HumanMethylation27 Beadchip	494	leukocyte lymphoblast	European, African Descent, Asian, Native American, Others, Mixed	GEO
14	GSE27317	Illumina HumanMethylation27 Beadchip	168	blood and blood cells	European, African Descent, Others	GEO
15	GSE28746	Illumina HumanMethylation27 Beadchip	84	saliva	European, African Descent, Hispanic	GEO
16	GSE30601	Illumina HumanMethylation27 Beadchip	94	gastric	Asian	GEO
17	GSE30758	Illumina HumanMethylation27 Beadchip	152	uterine cervix	European	GEO
18	GSE30870	Illumina HumanMethylation450 Beadchip	40	blood and blood cells	European	GEO
19	GSE32148	Illumina HumanMethylation450 Beadchip	20	blood and blood cells	European	GEO
20	GSE32393	Illumina HumanMethylation27 Beadchip	23	breast	European	GEO
21	GSE34035	Illumina HumanMethylation27 Beadchip	197	saliva	European, African Descent, Hispanic, Asian, Native American, Mixed	GEO
22	GSE36054	Illumina HumanMethylation450 Beadchip	134	blood and blood cells	European, African Descent, Asian, Others	GEO
23	GSE36064	Illumina HumanMethylation450 Beadchip	77	blood and blood cells	European, African Descent, Asian, Others	GEO
24	GSE37008	Illumina HumanMethylation27 Beadchip	99	blood and blood cells	European, Others	GEO
25	GSE37754	Illumina HumanMethylation450 Beadchip	10	breast	European, African Descent	GEO
26	GSE37988	Illumina HumanMethylation27 Beadchip	62	liver	Asian	GEO
27	GSE38608	Illumina HumanMethylation27 Beadchip	36	brain different parts	European, Others	GEO
28	GSE38873	Illumina HumanMethylation27 Beadchip	168	brain different parts	European	GEO
29	GSE40005	Illumina HumanMethylation450 Beadchip	12	blood and blood cells	European, African Descent, Others	GEO
30	GSE40279	Illumina HumanMethylation450 Beadchip	656	blood and blood cells	European, Hispanic	GEO
31	GSE41037	Illumina HumanMethylation27 Beadchip	394	blood and blood cells	European	GEO
32	GSE41169	Illumina HumanMethylation450 Beadchip	33	blood and blood cells	European	GEO
33	GSE41782	Illumina HumanMethylation450 Beadchip	9	blood and blood cells	European	GEO
34	GSE41826	Illumina HumanMethylation450 Beadchip	77	brain different parts	European, African Descent	GEO
35	GSE42510	Illumina HumanMethylation27 Beadchip	17	heart	European	GEO
36	GSE42700	Illumina HumanMethylation450 Beadchip	53	buccal or oral	European	GEO
37	GSE42861	Illumina HumanMethylation450 Beadchip	335	blood and blood cells	Asian	GEO
38	GSE42865	Illumina HumanMethylation450 Beadchip	6	blood and blood cells	European	GEO
39	GSE44667	Illumina HumanMethylation450 Beadchip	40	chorionic villi	European	GEO
40	GSE48325	Illumina HumanMethylation450 Beadchip	45	liver	European	GEO
41	GSE49149	Illumina HumanMethylation450 Beadchip	29	pancreas	European	GEO
42	GSE50660	Illumina HumanMethylation450 Beadchip	179	blood and blood cells	European	GEO
43	GSE51032	Illumina HumanMethylation450 Beadchip	424	blood and blood cells	European	GEO
44	GSE51954	Illumina HumanMethylation450 Beadchip	78	skin or dermal	European	GEO
45	GSE52401	Illumina HumanMethylation450 Beadchip	244	lung	European	GEO
46	GSE53051-part1	Illumina HumanMethylation450 Beadchip	10	breast	European, African Descent, Others	GEO
47	GSE53051-part2	Illumina HumanMethylation450 Beadchip	11	lung	European, African Descent, Others	GEO
48	GSE53051-part3	Illumina HumanMethylation450 Beadchip	12	pancreas	European, African Descent, Others	GEO
49	GSE53051-part4	Illumina HumanMethylation450 Beadchip	12	thyroid	European, African Descent, Others	GEO
50	GSE53051-part5	Illumina HumanMethylation450 Beadchip	18	colon	European, African Descent, Others	GEO
51	GSE53740	Illumina HumanMethylation450 Beadchip	193	blood and blood cells	European, Hispanic, Asian, Others	GEO
52	GSE54503	Illumina HumanMethylation450 Beadchip	66	liver	European, African Descent, Hispanic, Asian, Others	GEO
53	GSE55763	Illumina HumanMethylation450 Beadchip	2711	blood and blood cells	European	GEO
54	GSE56046	Illumina HumanMethylation450 Beadchip	1202	blood and blood cells	European, African Descent, Hispanic	GEO
55	GSE56105	Illumina HumanMethylation450 Beadchip	614	blood and blood cells	European	GEO
56	GSE56581	Illumina HumanMethylation450 Beadchip	214	blood and blood cells	European, African Descent, Hispanic	GEO
57	GSE58651	Illumina HumanMethylation450 Beadchip	3	blood and blood cells	Mixed	GEO
58	GSE58888	Illumina HumanMethylation450 Beadchip	143	blood and blood cells	European	GEO
59	GSE59509-part1	Illumina HumanMethylation450 Beadchip	12	saliva	Asian	GEO
60	GSE59509-part2	Illumina HumanMethylation450 Beadchip	12	semen	Asian	GEO
61	GSE59509-part3	Illumina HumanMethylation450 Beadchip	15	blood and blood cells	Asian	GEO
62	GSE59509-part4	Illumina HumanMethylation450 Beadchip	3	vagina	Asian	GEO
63	GSE60753	Illumina HumanMethylation450 Beadchip	34	liver	European, African Descent, Others	GEO
64	GSE61257	Illumina HumanMethylation450 Beadchip	15	adipose tissue	European	GEO
65	GSE61258	Illumina HumanMethylation450 Beadchip	32	liver	European	GEO
66	GSE61441	Illumina HumanMethylation450 Beadchip	46	kidney	Asian	GEO
67	GSE62640	Illumina HumanMethylation450 Beadchip	87	pancreas	European	GEO
68	GSE64509	Illumina HumanMethylation450 Beadchip	260	brain different parts	European, African Descent, Others	GEO
69	GSE68194	Illumina HumanMethylation450 Beadchip	115	blood and blood cells	European	GEO
70	GSE69270	Illumina HumanMethylation450 Beadchip	184	blood and blood cells	European	GEO
71	GSE70977	Illumina HumanMethylation450 Beadchip	71	buccal or oral	European, African Descent, Others	GEO
72	GSE72773	Illumina HumanMethylation450 Beadchip	310	blood and blood cells	European, Hispanic, Native American	GEO
73	GSE72775	Illumina HumanMethylation450 Beadchip	335	blood and blood cells	European, Hispanic	GEO
74	GSE72777	Illumina HumanMethylation450 Beadchip	46	blood and blood cells	European, Native American	GEO
75	GSE74193	Illumina HumanMethylation450 Beadchip	382	brain different parts	European, African Descent	GEO
76	GSE74214	Illumina HumanMethylation450 Beadchip	18	breast	European, African Descent, Others	GEO
77	GSE74548	Illumina HumanMethylation450 Beadchip	87	blood and blood cells	European	GEO
78	GSE75008	Illumina HumanMethylation450 Beadchip	40	lung	European	GEO
79	GSE75704	Illumina HumanMethylation450 Beadchip	72	brain different parts	European, Asian	GEO
80	GSE77135	Illumina HumanMethylation450 Beadchip	21	fibroblast	European, African Descent, Hispanic	GEO
81	GSE78874	Illumina HumanMethylation450 Beadchip	259	saliva	European, Hispanic	GEO
82	GSE79100	Illumina HumanMethylation450 Beadchip	31	kidney	European, African Descent	GEO
83	GSE80970	Illumina HumanMethylation450 Beadchip	138	brain different parts	European	GEO
84	GSE81224-part1	Illumina HumanMethylation450 Beadchip	5	fallopian tube	European	GEO
85	GSE81224-part2	Illumina HumanMethylation450 Beadchip	5	ovary	European	GEO
86	GSE85506	Illumina HumanMethylation450 Beadchip	47	blood and blood cells	European, African Descent, Mixed	GEO
87	GSE85566	Illumina HumanMethylation450 Beadchip	115	airway	European, African Descent, Others	GEO
88	GSE86961	Illumina HumanMethylation450 Beadchip	41	thyroid	European, Others	GEO
89	GSE87571	Illumina HumanMethylation450 Beadchip	732	blood and blood cells	European	GEO
90	GSE87640	Illumina HumanMethylation450 Beadchip	84	blood and blood cells	European	GEO
91	GSE88883	Illumina HumanMethylation450 Beadchip	100	breast	European, African Descent, Others	GEO
92	GSE88940	Illumina HumanMethylation450 Beadchip	20	adipose tissue	European, African Descent, Hispanic	GEO
93	GSE89472	Illumina HumanMethylation450 Beadchip	10	blood and blood cells	European	GEO
94	GSE89707	Illumina HumanMethylation450 Beadchip	75	brain different parts	European	GEO
95	GSE92462	Illumina HumanMethylation450 Beadchip	13	neuron	European, African Descent, Others	GEO
96	GSE94734	Illumina HumanMethylation450 Beadchip	178	buccal or oral	European, African Descent, Hispanic, Asian, Others, Mixed	GEO
97	GSE94785	Illumina HumanMethylation450 Beadchip	52	lung	European	GEO
98	GSE94876	Illumina HumanMethylation450 Beadchip	40	buccal or oral	European, African Descent, Others	GEO
99	GSE97362	Illumina HumanMethylation450 Beadchip	125	blood and blood cells	European	GEO
100	GSE98203	Illumina HumanMethylation450 Beadchip	29	neuron	European	GEO
101	GSE99624	Illumina HumanMethylation450 Beadchip	48	blood and blood cells	European	GEO
102	E-MTAB-487	Illumina HumanMethylation27 Beadchip	32	blood and blood cells	European	ArrayExpress
Series with heterogeneous sample origins are startified into smaller, labelled subseries. The sample size of each series indicates the number utilized in the study instead of the total. For analysis, histologically similar tissues/organs are pooled, and ethnic background are unified into categories. Consequently, information presented may not match the original series annotations.
