# Supplementary material for: Epigenetic estimates reveal a species-specific extension of lifespan in modern humans
Source: Research Square preprint supplement (doi:10.21203/rs.3.rs-8101134/v1), 2026-01-29
Supplement: Supplementary file 3 [file 80b8b62e25a1a6e4f45401e7.xlsx]

## Sheet: Legend
Table S5: Methylation sites and respective coefficients/weights for methylation clocks
This table comprises 16 subtables, each listing the methylation sites with their corresponding coefficients (original clocks) or weights (PC-guided clocks) used in a methylation clock and labelled by its name. For PC-guided clocks, the weights are derived from PCs and their respective nonzero coefficients (Methods).

## Sheet: Hannum-71 Clock (2013)
Table S5: Methylation sites and respective coefficients/weights for methylation clocks
Site	Coefficient
(Intercept)	0
cg00481951	-2.72
cg00486113	-10.7
cg00748589	8.21
cg01528542	-2.98
cg02046143	-10.2
cg02085953	1.02
cg02650266	10.2
cg02867102	-12.5
cg03032497	8.4
cg03399905	28
cg03473532	-3.31
cg03607117	10.7
cg04400972	9.62
cg04416734	11.9
cg04474832	-7.1
cg04875128	-4.37
cg04940570	11.6
cg05442902	-22.7
cg06419846	13.4
cg06493994	9.42
cg06639320	8.95
cg06685111	-13.1
cg06874016	-4.37
cg07082267	2.87
cg07547549	3.11
cg07553761	3.72
cg07583137	3.03
cg07927379	-1.42
cg07955995	13.7
cg08097417	27.3
cg08234504	-3.16
cg08415592	-6.92
cg08540945	9.41
cg09651136	-15.8
cg09809672	-0.74
cg10501210	-6.46
cg11067179	14.7
cg13001142	-5.8
cg14361627	10.7
cg14556683	-4.04
cg14692377	19.1
cg16054275	-11.1
cg16419235	-1.6
cg16867657	10.8
cg18473521	8.85
cg19283806	-4.29
cg19722847	-5.66
cg19935065	13.4
cg20052760	-12.6
cg20426994	19.1
cg20822990	-15.7
cg21139312	17.1
cg21296230	8.39
cg22016779	1.79
cg22158769	-2.06
cg22213242	23.7
cg22285878	-20.7
cg22454769	4.85
cg22512670	1.05
cg22736354	4.42
cg22796704	-10.6
cg23091758	-0.392
cg23500537	5.67
cg23606718	8.35
cg23744638	0.0859
cg24079702	2.48
cg25410668	3.87
cg25428494	-1.81
cg25478614	4.01
ch.13.39564907R	-20.6
ch.2.30415474F	5.79

## Sheet: Horvath-353 Clock (2013)
Table S5: Methylation sites and respective coefficients/weights for methylation clocks
Site	Coefficient
(Intercept)	0.695507
cg00075967	0.129337
cg00091693	-0.00200849
cg00168942	-0.111945
cg00374717	0.00501786
cg00431549	-0.1362
cg00436603	0.000265206
cg00864867	1.59976
cg00945507	0.0568524
cg01027739	0.102863
cg01027805	-0.167673
cg01234063	-0.0405359
cg01262913	-0.0335812
cg01353448	0.23856
cg01407797	-0.379167
cg01459453	-0.345952
cg01485645	-0.0257533
cg01511567	-0.686112
cg01560871	-0.0369107
cg01570885	-0.0312583
cg01584473	0.0886284
cg01644850	0.159949
cg01656216	0.0428055
cg01820374	-0.271122
cg01873645	-0.604056
cg01968178	1.16925
cg02047577	-0.6584
cg02071305	-0.0484295
cg02085507	0.00612755
cg02154074	0.044757
cg02217159	-0.0865126
cg02275294	-0.337498
cg02331561	0.126929
cg02332492	0.0627713
cg02335441	-0.171285
cg02364642	-0.0242703
cg02388150	0.425971
cg02479575	1.87545
cg02489552	0.0737414
cg02580606	0.349274
cg02654291	0.140583
cg02827112	0.0506461
cg02972551	0.473946
cg03019000	-0.459777
cg03103192	0.0235363
cg03167275	-0.551041
cg03270204	0.0135447
cg03286783	-0.854785
cg03330058	-0.0644711
cg03565323	-0.207653
cg03578041	-0.032631
cg03588357	-0.858843
cg03682823	-0.112677
cg03760483	0.0149464
cg03891319	-0.0268935
cg03947362	-0.301555
cg04005032	-0.144764
cg04084157	1.03414
cg04094160	-0.201195
cg04121983	0.0549207
cg04126866	0.0793746
cg04268405	-0.416694
cg04431054	-0.0599251
cg04452713	-0.00147837
cg04474832	-0.444042
cg04528819	0.771798
cg04836038	0.440056
cg04999691	-0.0017569
cg05250458	0.0872956
cg05294243	0.118518
cg05365729	0.0529401
cg05442902	-0.578209
cg05590257	-0.0311539
cg05675373	0.346356
cg05755779	0.0602151
cg05847778	-0.0587044
cg05903609	-0.158648
cg05921699	0.018065
cg05960024	0.0810299
cg06044899	-0.142865
cg06117855	-0.00711385
cg06121469	0.0270246
cg06144905	0.597211
cg06361108	0.433158
cg06462291	0.015759
cg06493994	1.85801
cg06513075	0.130552
cg06557358	-0.141331
cg06688848	-0.0163076
cg06738602	-0.151675
cg06810647	0.374888
cg06836772	-0.238016
cg06926735	0.00101021
cg06952310	0.0917607
cg06993413	1.50318
cg07158339	-0.626329
cg07285276	0.192243
cg07291563	0.04164
cg07337598	0.0882269
cg07388493	-0.520727
cg07408456	-0.218776
cg07455279	0.00563226
cg07498421	-0.0594904
cg07595943	0.0511781
cg07663789	-0.0747897
cg07730301	-0.0117789
cg07770222	0.0099404
cg07849904	-0.116543
cg08030082	0.0128303
cg08090772	-0.341458
cg08124722	0.0084849
cg08186124	-0.0705052
cg08251036	0.0686349
cg08331960	-0.42705
cg08370996	0.812908
cg08413469	0.140511
cg08434234	-0.211774
cg08771731	0.103387
cg08965235	-0.220131
cg09019938	-0.121722
cg09118625	0.307808
cg09133026	-0.196543
cg09191327	-0.278394
cg09418283	0.0275029
cg09441152	-0.683076
cg09509673	0.0137452
cg09646392	-0.000417407
cg09722397	-0.147296
cg09722555	-0.346466
cg09785172	-0.0165611
cg09809672	-0.391319
cg09869858	0.0663166
cg09885951	0.0952375
cg10045881	-0.0468031
cg10266490	-0.014675
cg10281002	0.468417
cg10345936	0.0699713
cg10376763	-0.115358
cg10377274	0.0571391
cg10486998	-0.389336
cg10523019	0.514647
cg10865119	-0.0691579
cg10920957	-0.399904
cg10940099	0.0931357
cg11025793	-0.0120535
cg11299964	-0.157897
cg11314684	-0.0761586
cg11388238	-0.350585
cg11653266	-0.176347
cg11932564	0.700001
cg12351433	0.0792792
cg12373771	0.533302
cg12413566	-0.0456444
cg12616277	-0.00297981
cg12768605	-0.188561
cg12830694	0.339727
cg12941369	-0.131068
cg12946225	0.133613
cg12985418	-0.431304
cg13038560	0.261381
cg13129046	-0.205992
cg13216057	-0.138857
cg13269407	-0.0912389
cg13302154	-0.00352534
cg13319175	0.0138482
cg13460409	0.412023
cg13547237	-0.201509
cg13682722	0.110101
cg13828047	-0.448972
cg13836627	0.0299837
cg13854874	0.0496133
cg13899108	0.0336517
cg13931228	-0.120677
cg13975369	0.378716
cg14060828	-0.303566
cg14163776	-0.119512
cg14175438	-0.336714
cg14258236	0.0868975
cg14308452	0.00314204
cg14329157	0.251931
cg14408969	-0.140373
cg14409958	-0.0503838
cg14423778	-0.0871209
cg14424579	3.06747
cg14501253	-0.0669222
cg14597908	-0.0307982
cg14654875	-0.122183
cg14658362	-0.168604
cg14723032	0.000900283
cg14727952	-0.136028
cg14894144	0.0533774
cg14992253	0.0358242
cg15185286	-0.241642
cg15262928	-0.0784827
cg15341340	-0.468758
cg15381769	-0.119627
cg15547534	0.382898
cg15661409	0.0437449
cg15703512	-0.730703
cg15804973	-0.108169
cg15974053	-0.00948655
cg15988232	0.0363248
cg16034652	0.00649554
cg16150435	0.0174954
cg16168311	-0.196861
cg16241714	2.5519
cg16358826	-0.0129664
cg16408394	-1.7192
cg16419345	0.282564
cg16494477	-0.0664399
cg16547529	0.167494
cg16579101	-0.0960677
cg16744741	-0.346284
cg16899442	-0.153804
cg16984944	-5.94e-06
cg17063929	-0.00198556
cg17099569	0.115573
cg17274064	-0.000157189
cg17285325	0.137316
cg17324128	-0.569717
cg17338403	-0.645059
cg17408647	-0.0948432
cg17589341	-0.0659577
cg17655614	0.156624
cg17686885	-0.0579921
cg17729667	0.14683
cg17853587	-0.0229927
cg17960516	0.0666205
cg18031008	0.264554
cg18055007	0.0379154
cg18139769	-0.089987
cg18180783	0.121874
cg18328933	-0.370481
cg18440048	0.35637
cg18573383	0.554266
cg18956095	-0.478583
cg18983672	0.201888
cg18984151	0.31501
cg19008809	0.59093
cg19044674	-0.0559314
cg19046959	-0.0697739
cg19167673	-0.47038
cg19273182	-0.754589
cg19305227	0.0192597
cg19346193	0.149636
cg19420968	0.0989124
cg19478743	0.122669
cg19514928	-0.00502793
cg19569684	-0.286095
cg19692710	0.0213625
cg19706682	-0.103539
cg19722847	-0.452037
cg19724470	-0.10455
cg19761273	-0.886929
cg19853760	-0.241884
cg19945840	0.6285
cg20100381	-0.120249
cg20240860	-0.0524786
cg20295671	-0.0280082
cg20305610	-0.16436
cg20524216	-0.389841
cg20692569	0.744776
cg20761322	0.116738
cg20795863	0.0942755
cg20828084	0.144462
cg20914508	-0.00360198
cg20947775	-0.216873
cg20999813	-0.387629
cg21096399	0.119679
cg21211748	-0.166398
cg21305265	-0.0453682
cg21370143	-0.0544018
cg21378206	0.195972
cg21395782	-0.123873
cg21460081	-0.150207
cg21801378	0.205911
cg21870884	0.135875
cg21950518	-0.00251062
cg22006386	0.027954
cg22171829	-0.133887
cg22190114	0.122
cg22197830	-0.214855
cg22289837	-0.0576049
cg22432269	-0.0475209
cg22449114	0.00955691
cg22568540	0.0209511
cg22613010	-0.00136474
cg22637507	-0.161365
cg22679120	0.00832141
cg22736354	1.71851
cg22809047	0.160174
cg22901840	0.078585
cg22920873	0.114375
cg22947000	-0.385598
cg23092072	0.999918
cg23124451	-0.118915
cg23180365	-0.173188
cg23517605	0.128378
cg23662675	0.600765
cg23786576	-0.359682
cg23941599	0.2665
cg24058132	-0.243414
cg24081819	-0.00950238
cg24116886	0.187704
cg24126851	0.000792206
cg24254120	0.372918
cg24262469	0.152852
cg24450312	-0.00150883
cg24471894	-0.057512
cg24580001	0.33964
cg24834740	-0.0870065
cg24888049	-0.129936
cg24899750	-0.307425
cg25070637	-0.279922
cg25101936	-0.0577446
cg25148589	0.179969
cg25159610	0.224447
cg25166896	-0.00231509
cg25411725	-0.028136
cg25505610	1.50223
cg25552492	-0.17603
cg25564800	-0.00446162
cg25657834	-0.120292
cg25683012	-1.39202
cg25771195	0.304478
cg25781123	0.0199747
cg25809905	-0.216625
cg25928579	-0.0302987
cg26003813	-0.192766
cg26005082	0.283314
cg26043391	-0.361823
cg26045434	-0.296285
cg26162695	-0.0438634
cg26297688	0.959652
cg26372517	0.126026
cg26394940	-0.166269
cg26453588	0.127052
cg26456957	-0.159361
cg26614073	-0.506521
cg26620959	-0.0407431
cg26723847	-0.144822
cg26824091	0.549029
cg26842024	0.358162
cg26845300	0.254089
cg27015931	-0.466528
cg27016307	-0.0353263
cg27092035	-0.0557685
cg27169020	0.0872869
cg27202708	-0.138636
cg27319898	-0.211231
cg27377450	0.0924409
cg27413543	-0.261275
cg27494383	0.0645966
cg27544190	-0.869124

## Sheet: Horvath-391 Clock (2018)
Table S5: Methylation sites and respective coefficients/weights for methylation clocks
Site	Coefficient
(Intercept)	-0.447119
cg00017842	0.15636
cg00073460	0.0593759
cg00194146	0.0251396
cg00257455	-0.161699
cg00343092	-0.0820732
cg00347775	0.000841664
cg00431549	8.83e-06
cg00454305	0.104796
cg00503840	0.048661
cg00522231	0.018122
cg00582628	0.020113
cg00593462	0.0975704
cg00658652	0.15261
cg00702638	0.725076
cg00748589	0.16672
cg00753885	-0.478311
cg00760938	0.0771995
cg00795927	-0.0663734
cg00991848	0.443893
cg01059398	-0.00885338
cg01243072	-0.00132993
cg01262913	-0.00199892
cg01447660	-0.11575
cg01459453	0.0419079
cg01511232	0.169551
cg01527307	0.150123
cg01528542	-0.142372
cg01560871	-0.0495692
cg01570885	-0.0174837
cg01620164	-0.0654141
cg01740766	-0.0481089
cg01752203	-0.0219794
cg01820374	0.122892
cg01844642	0.0934118
cg01883408	0.210085
cg01892695	-0.250619
cg01949403	0.059578
cg02071305	0.00655184
cg02085953	0.0199202
cg02228185	-0.0403226
cg02244028	0.00450924
cg02275294	-0.142869
cg02281167	0.0508276
cg02328239	0.16437
cg02331561	-0.251921
cg02383785	0.184785
cg02532488	-0.700326
cg02650266	0.028819
cg02821342	-0.23832
cg02867102	-0.119892
cg02871659	0.0885458
cg02901139	-0.0731148
cg03019000	-0.0843791
cg03032497	0.111167
cg03183882	-1.00739
cg03361973	0.060348
cg03364683	0.0365547
cg03473532	-0.212958
cg03486383	0.163455
cg03555227	0.191706
cg03607117	0.169781
cg03643998	-0.0961558
cg03670162	-0.272549
cg03746976	-0.0577133
cg03771840	0.0632839
cg03891319	-0.256081
cg03894990	0.00152281
cg03984502	0.222121
cg03991512	-0.0763138
cg04031656	0.0547863
cg04084157	0.358752
cg04126866	-0.00239599
cg04267101	-0.0196866
cg04268405	-0.131068
cg04424621	0.0387776
cg04474832	0.12053
cg04528819	0.0344649
cg04576021	0.190381
cg04596060	-0.665425
cg04642300	0.000163032
cg04858164	0.0210618
cg04875128	0.000358099
cg04940570	0.289083
cg05024939	0.182893
cg05106770	-0.0599724
cg05442902	-0.240315
cg05468948	0.138578
cg05496363	0.0526851
cg05542681	0.13688
cg05675373	0.0244793
cg05928581	-0.0425104
cg05940231	-0.106705
cg05940691	-0.0599925
cg05960024	-0.00102153
cg06112560	0.164151
cg06144905	0.159584
cg06231995	0.474821
cg06419846	0.173054
cg06448705	0.113572
cg06458239	0.346805
cg06462220	-0.400871
cg06493994	0.194146
cg06639320	0.0197387
cg06648759	0.426865
cg06685111	-0.11805
cg06690548	0.0947173
cg06737494	0.0639123
cg06738602	-0.0949009
cg06796779	0.0535732
cg06874016	-0.0877284
cg06888746	0.0663635
cg06908778	-0.157691
cg07016730	-0.0293829
cg07082267	-0.469183
cg07095347	-0.0220078
cg07110949	0.00265734
cg07115626	-0.0947636
cg07158339	-0.0317816
cg07172885	0.117264
cg07211259	-0.0053794
cg07303143	0.734121
cg07312601	-0.135092
cg07502389	0.315776
cg07547549	0.212569
cg07553761	0.26245
cg07583137	0.0455665
cg07589899	0.106602
cg07906193	-0.0288453
cg08097417	0.871372
cg08166272	0.105439
cg08234504	-0.261526
cg08280936	-0.236131
cg08415592	-0.147841
cg08420066	-0.00879129
cg08454546	-0.0949425
cg08540945	-0.169692
cg08587542	-0.106509
cg08622677	0.228244
cg08900043	-0.0619644
cg08911208	-0.0942223
cg08949164	0.264842
cg08993878	-0.0643387
cg09025210	0.0387972
cg09155044	-0.340671
cg09183146	0.0731504
cg09428349	-0.40912
cg09436502	0.0563263
cg09646392	-0.0331842
cg09671951	0.100547
cg09748749	-0.202803
cg09809672	-0.100326
cg09993145	-0.0426393
cg10052840	-0.0712807
cg10192196	0.103901
cg10281002	0.025872
cg10345936	-0.0129008
cg10376763	-0.0920873
cg10498798	-0.270928
cg10501210	-0.316526
cg10523019	0.126152
cg10570177	-0.0986336
cg10586358	-0.0459786
cg10636297	0.18592
cg10644544	-0.66774
cg10699171	-0.0175119
cg10699857	-0.272484
cg10729426	0.234126
cg10825530	-0.0322919
cg10837404	-0.102091
cg10855531	-0.300557
cg10917602	-0.0154101
cg10959651	-0.0382092
cg11006267	0.300526
cg11205552	0.0397451
cg11298786	-0.196434
cg11620135	-0.0179032
cg11671968	0.120568
cg11766468	0.0552769
cg11896923	0.0376283
cg12082609	0.154152
cg12105450	0.0099448
cg12140144	0.363181
cg12177001	-0.0778539
cg12238343	0.0619444
cg12303084	0.65172
cg12328429	0.084155
cg12373771	-0.139864
cg12402251	0.126795
cg12459502	-0.0941508
cg12530994	-0.229184
cg12608692	-0.00241284
cg12753631	-0.341572
cg12757011	0.155999
cg12776156	-0.178994
cg12869659	-0.0425676
cg12941369	0.0241918
cg13027206	-0.0459023
cg13029847	0.647782
cg13093111	0.00881389
cg13221458	-0.0394802
cg13302154	0.108
cg13547237	-0.244821
cg13586038	0.123252
cg13649056	0.039139
cg13683374	-0.0826411
cg13734401	-0.0956561
cg13767001	0.0831434
cg13828440	0.00736991
cg13848598	0.193739
cg13909661	-0.274042
cg13931228	-0.248554
cg14059835	-0.0160654
cg14175438	-0.0682897
cg14314729	-0.0670634
cg14334310	-0.0468817
cg14345676	0.00131601
cg14396995	0.124113
cg14411282	-0.257289
cg14423778	0.060485
cg14522800	0.130624
cg14556683	-0.137408
cg14565725	-0.0355641
cg14614643	-0.043393
cg14962509	0.182311
cg15015340	-0.177069
cg15149655	0.200279
cg15188939	0.204902
cg15201877	0.392098
cg15277914	-0.0333733
cg15405572	0.0373532
cg15480367	0.194531
cg15811427	-0.00353256
cg15910502	-0.133774
cg15988232	-0.0584162
cg16008966	-0.203908
cg16012294	0.139311
cg16054275	-0.233968
cg16255583	-0.180264
cg16281600	0.0476469
cg16333846	0.226866
cg16419235	0.114779
cg16599143	0.14198
cg16612562	0.00129345
cg16717122	0.145165
cg16867657	0.895063
cg16933388	0.133862
cg16983159	-0.165181
cg17110586	-0.0686816
cg17243289	0.0437262
cg17266282	-0.0422493
cg17274064	-0.0616188
cg17321954	0.473386
cg17589341	0.0573423
cg17627559	-0.0414859
cg17861230	-0.317548
cg17879376	-0.202709
cg18267374	-0.211901
cg18303397	0.0217877
cg18335931	-0.25013
cg18442362	0.00651041
cg18468088	0.271258
cg18501647	0.016363
cg18573383	0.181171
cg18582260	0.0350265
cg18633600	0.258224
cg18693704	-0.281444
cg18738190	-0.107287
cg18769120	0.0619127
cg18771300	-0.0200485
cg18933331	-0.231763
cg19015086	0.153298
cg19269039	-0.017558
cg19283806	-0.117204
cg19381811	-0.0283216
cg19497517	-0.0433955
cg19663246	-0.0386445
cg19702785	0.127634
cg19722847	-0.181926
cg19724470	-0.100719
cg19853760	-0.061454
cg19859445	0.187401
cg20052760	-0.0873627
cg20063906	-0.0597734
cg20102280	-0.0620426
cg20397034	-0.243167
cg20404336	0.157369
cg20426994	-0.101388
cg20540209	0.168254
cg20654468	-0.05372
cg20665157	0.00716728
cg20669012	0.126232
cg20692569	0.0313588
cg20755989	0.241204
cg20822990	-0.00702523
cg21184711	0.0950308
cg21205978	0.0816584
cg21254939	0.0215716
cg21296230	-0.0254002
cg21467614	-0.0413027
cg21572722	0.258923
cg21743182	0.00284096
cg21747310	-0.142141
cg21801378	-0.108999
cg21815258	0.326224
cg21870884	-0.0126814
cg21874213	-0.17214
cg21878650	-0.128025
cg21907579	-0.177227
cg21911021	0.0435839
cg21940708	0.226979
cg21944491	-0.0619762
cg21992250	0.14822
cg22061831	-0.177458
cg22179082	0.00296486
cg22264409	0.0250657
cg22372849	-0.140116
cg22454769	0.051866
cg22507023	0.238759
cg22679120	-0.0402245
cg22736354	0.12315
cg22796704	-0.0297594
cg22809047	0.118967
cg22827210	-0.0272551
cg22843803	0.0564937
cg22851420	0.0971978
cg22943590	-0.0831777
cg22947000	0.0221231
cg22982767	-0.412197
cg23028740	-0.0098847
cg23045908	0.137327
cg23077820	0.0610104
cg23091758	0.105288
cg23124451	-0.0376152
cg23239150	0.0705384
cg23357533	-0.315331
cg23375552	-0.149639
cg23389651	-0.293553
cg23398076	0.00566122
cg23462687	-0.183735
cg23500537	0.233706
cg23517605	-0.0745733
cg23605843	0.0793872
cg23606718	0.700747
cg23643435	0.0128754
cg23668631	0.00543685
cg23709172	-0.186107
cg23710218	-0.349168
cg23754392	-0.291911
cg23836737	-0.153545
cg23857078	0.234566
cg23995914	0.140281
cg24046474	0.273015
cg24058132	-0.112975
cg24107728	-0.106543
cg24217948	-0.064571
cg24375409	-0.0238046
cg24834740	-0.0719029
cg24838825	0.0643577
cg24843443	0.0237024
cg24888989	1.23038
cg25005357	0.175415
cg25135555	0.192896
cg25148589	0.078559
cg25256723	-0.120981
cg25410668	0.278005
cg25427880	0.163756
cg25436157	-0.104484
cg25459323	0.0237302
cg25478614	0.113493
cg25719851	-0.0229256
cg25809905	-0.09807
cg25969122	-0.230844
cg26005082	0.123794
cg26101086	-0.157277
cg26311454	0.122619
cg26312920	0.00682285
cg26552743	0.143275
cg26581729	0.0200948
cg26614073	-0.124228
cg26824216	-0.160472
cg26842024	0.484249
cg26843711	0.110107
cg26921969	0.395075
cg26933021	-0.0905001
cg26974444	0.076079
cg26986871	0.0568296
cg27009703	-0.177741
cg27131176	-0.192317
cg27187881	-0.244556
cg27212234	1.0199
cg27544190	-0.578093

## Sheet: Weidner-102 Clock (2014)
Table S5: Methylation sites and respective coefficients/weights for methylation clocks
Site	Coefficient
(Intercept)	51.8767
cg00059225	26.9427
cg00489401	-17.1509
cg00503840	7.02139
cg00563932	-4.32336
cg01560871	5.53607
cg01739167	6.60121
cg01820374	-6.9074
cg02228185	-15.3237
cg02489552	-4.47375
cg02844545	-0.970943
cg02994956	-3.27161
cg03224418	-9.44481
cg03340878	-9.38087
cg03958979	-12.2396
cg04036898	-0.268606
cg04123409	-0.00413474
cg04474832	1.19675
cg05228408	-3.01082
cg05294455	-1.87686
cg05331214	16.038
cg05379350	13.6246
cg05436231	-1.60394
cg05488632	8.42607
cg06291867	-16.4252
cg06493994	51.333
cg06638433	-36.6023
cg07211259	-7.3083
cg07388493	-0.801086
cg07621046	5.03275
cg07752420	16.6444
cg07810156	-5.37628
cg08012287	3.79923
cg08090640	9.01628
cg08209133	23.5842
cg08468689	-11.6889
cg08598221	-4.05985
cg09462576	-4.55582
cg09809672	-24.1849
cg10917602	-11.8402
cg12554573	15.0225
cg12883767	-5.70135
cg13129046	-24.6183
cg13406950	12.7525
cg13807496	-23.7802
cg13870494	-7.54971
cg13870866	-8.25957
cg14456683	5.25475
cg14918082	-0.167236
cg15195412	24.4462
cg15297650	8.38054
cg15379633	16.9469
cg15538427	-3.88522
cg15804973	-4.34209
cg16352283	-14.2887
cg16363586	0.546974
cg16386080	20.3826
cg16744741	0.707611
cg17421623	7.63151
cg17431739	5.33836
cg17471102	-12.4072
cg17791651	2.12395
cg17861230	17.2817
cg18182399	1.15874
cg18660898	-18.682
cg19046959	-3.98946
cg19722847	-19.5151
cg19724470	-4.704
cg19761273	-21.4179
cg20264732	6.99833
cg20366832	-11.9691
cg20654468	11.2959
cg21120249	6.85474
cg21296230	20.2133
cg21448423	1.35368
cg21788470	6.47068
cg21801378	74.3762
cg21870884	-2.26296
cg21992250	11.7953
cg22580512	-26.5675
cg22736354	12.6203
cg22919728	-1.81807
cg22947000	8.23966
cg23124451	-11.4847
cg23320649	-9.77829
cg23679724	8.50863
cg24178740	-11.9569
cg24713204	-12.4376
cg24768561	6.2278
cg25256723	-10.3153
cg25268718	0.538966
cg25431974	0.200465
cg25538571	1.12486
cg25762706	16.6464
cg25809905	-27.9786
cg25947945	-5.08349
cg26394940	-1.44074
cg26581729	2.68669
cg26610808	3.65387
cg26614073	-1.0511
cg26927807	26.0327
cg27320127	30.9447
cg27553955	10.9644

## Sheet: Weidner-3 Clock (2014)
Table S5: Methylation sites and respective coefficients/weights for methylation clocks
Site	Coefficient
(Intercept)	38
cg02228185	-26.4
cg17861230	164.7
cg25809905	-23.7

## Sheet: Lin-99 Clock (2016)
Table S5: Methylation sites and respective coefficients/weights for methylation clocks
Site	Coefficient
(Intercept)	12.217
cg00059225	36.8195
cg00489401	1.98683
cg00503840	31.2113
cg00563932	-3.50097
cg01560871	13.5035
cg01739167	33.8101
cg01820374	-30.8969
cg02228185	-8.63634
cg02489552	6.09699
cg02844545	0.380225
cg02994956	-6.45161
cg03224418	8.07557
cg03340878	5.95485
cg03958979	-16.0168
cg04036898	10.1622
cg04123409	-10.7674
cg04474832	-26.5566
cg05228408	0.476362
cg05294455	2.71073
cg05331214	9.83641
cg05379350	17.3407
cg05436231	17.7305
cg05488632	-11.249
cg06291867	13.0769
cg06493994	66.1612
cg06638433	10.6229
cg07211259	-12.4243
cg07388493	-4.77596
cg07621046	13.6468
cg07810156	15.3892
cg08012287	-18.99
cg08090640	8.31318
cg08209133	30.5003
cg08468689	-16.0629
cg08598221	2.6208
cg09462576	6.31248
cg09809672	-14.9504
cg10917602	-6.0294
cg12554573	1.8188
cg12883767	8.45912
cg13129046	-5.13683
cg13807496	-8.39313
cg13870494	19.7418
cg13870866	-39.1044
cg14456683	13.1457
cg14918082	15.5555
cg15195412	20.0503
cg15297650	-34.3066
cg15379633	15.414
cg15538427	-19.9349
cg15804973	-15.2141
cg16352283	-5.31241
cg16363586	13.6453
cg16386080	-29.2499
cg16744741	-9.58467
cg17421623	2.44
cg17431739	8.2259
cg17471102	-18.0635
cg17791651	8.72681
cg17861230	17.5027
cg18182399	-4.15276
cg18660898	13.2544
cg19046959	-13.3671
cg19722847	-13.0634
cg19724470	-5.55371
cg19761273	-16.3314
cg20264732	-20.6189
cg20366832	2.979
cg20654468	8.14606
cg21120249	-8.60742
cg21296230	28.1787
cg21448423	-4.46218
cg21801378	44.7163
cg21870884	22.9981
cg21992250	10.5217
cg22580512	-0.838318
cg22736354	36.9317
cg22919728	0.99214
cg22947000	-13.2172
cg23124451	-13.3615
cg23320649	8.70555
cg23679724	0.257931
cg24178740	-27.4761
cg24713204	-32.4873
cg24768561	-4.59174
cg25256723	-11.803
cg25268718	4.06576
cg25431974	-1.04861
cg25538571	10.2957
cg25762706	1.53402
cg25809905	-6.09747
cg25947945	-8.23873
cg26394940	0.892922
cg26581729	-7.99144
cg26610808	-21.3744
cg26614073	-11.4434
cg26927807	16.5195
cg27320127	48.9368
cg27553955	-0.7884

## Sheet: Lin-3 Clock (2016)
Table S5: Methylation sites and respective coefficients/weights for methylation clocks
Site	Coefficient
(Intercept)	111.83
cg02228185	-64.57
cg17861230	75.15
cg25809905	-42.57

## Sheet: Zhang-514 Clock (2019)
Table S5: Methylation sites and respective coefficients/weights for methylation clocks
Site	Coefficient
(Intercept)	65.793
cg00096065	-0.147242
cg00241664	-1.02537
cg00271522	-0.18918
cg00302979	-0.224303
cg00463859	-0.737306
cg00481951	0.295679
cg00548098	0.631355
cg00593462	1.30705
cg00717297	-0.0290723
cg00740914	-0.171336
cg00753885	-0.972729
cg00756943	0.00700226
cg00772585	-0.627443
cg00793186	1.60073
cg00797278	-0.503828
cg00805193	-0.240005
cg00850073	1.16181
cg00910503	-0.0348763
cg00925087	0.0654926
cg01031400	-0.102302
cg01054110	-0.449413
cg01055824	-0.383852
cg01055871	-0.170748
cg01136606	-0.223313
cg01141812	0.138696
cg01176329	0.165037
cg01196788	0.183149
cg01222316	-0.677516
cg01226614	0.0580192
cg01256539	-0.0276341
cg01331772	0.245841
cg01356950	-0.178263
cg01364769	-0.334456
cg01433297	0.0147755
cg01435493	-0.399013
cg01447660	-0.141
cg01511232	0.174339
cg01528542	-1.19618
cg01542719	-0.0017977
cg01620164	-0.787463
cg01738984	-0.0067322
cg01757168	0.0822948
cg01792616	0.0522146
cg01794929	0.683456
cg01820962	-0.805127
cg01832549	1.73741
cg01844642	0.639674
cg01873886	0.852443
cg02001279	-0.380506
cg02018902	0.000307211
cg02025827	-1.09848
cg02037503	-1.44485
cg02046143	-0.633993
cg02151816	0.216946
cg02181968	-0.94425
cg02204637	-0.311718
cg02272599	0.00523499
cg02355868	-0.0869601
cg02426324	0.00102472
cg02452500	0.154508
cg02497428	-0.00571149
cg02533423	0.11867
cg02762363	-0.188784
cg02795076	0.273871
cg02836046	0.134178
cg02838492	0.0540926
cg02871659	0.0291239
cg03025830	0.100094
cg03032497	0.326782
cg03039990	-0.102392
cg03076094	-0.0201651
cg03163545	-0.294133
cg03232933	0.111401
cg03234186	0.0992602
cg03261929	0.154854
cg03421353	0.0792136
cg03467555	0.0939702
cg03527802	-0.0785154
cg03607117	3.41325
cg03619256	0.644651
cg03633574	0.0220344
cg03638795	-1.07197
cg03646329	0.127561
cg03771840	0.272671
cg03773862	0.334016
cg03788004	-0.127939
cg03915012	-0.766355
cg03957108	0.303321
cg03984502	1.47318
cg04027548	-1.01445
cg04055490	-0.0212882
cg04081402	-0.771068
cg04084157	0.156222
cg04092800	-0.0166041
cg04105923	-0.497917
cg04144218	0.062001
cg04149978	0.191421
cg04200607	-0.111438
cg04218760	-0.0707299
cg04361926	-0.703176
cg04436528	-0.099468
cg04521765	-0.0579468
cg04596060	-1.25721
cg04604946	-2.3706
cg04621728	-0.118887
cg04646282	0.0741273
cg04662594	-0.120173
cg04684267	0.00353813
cg04709900	-1.3406
cg04749507	-0.357
cg04757168	0.207972
cg04836038	1.22378
cg04861640	-0.143916
cg04875128	1.35102
cg04955333	-0.904789
cg04999352	-0.0874846
cg05106770	-0.330306
cg05262777	0.155416
cg05294577	-0.0562938
cg05308819	-2.36562
cg05310309	0.177302
cg05324516	-0.00268033
cg05516505	-0.142742
cg05522498	0.476496
cg05542681	0.196627
cg05546763	0.580844
cg05612876	-0.0029867
cg05694095	-0.0129512
cg05780020	-0.631136
cg05898618	-0.896874
cg05915866	-0.385069
cg05923226	0.049134
cg05960039	-0.0152744
cg05998295	0.0595476
cg06007201	-1.61045
cg06068163	-0.340401
cg06083669	0.471668
cg06326667	-0.41907
cg06335143	0.621789
cg06396324	-0.0335746
cg06457011	-0.0515964
cg06493994	1.28859
cg06526721	-0.0129802
cg06532163	-0.223185
cg06547285	0.830764
cg06574422	0.642551
cg06639320	2.72439
cg06648759	2.72215
cg06672696	0.024613
cg06685111	-0.810505
cg06758350	-0.0683489
cg06784991	2.25284
cg06805925	0.555787
cg06819923	-0.699002
cg06836406	0.10944
cg06852243	0.201884
cg07040244	0.689775
cg07073120	-1.78625
cg07077459	-0.033786
cg07080372	-1.35816
cg07082267	-2.33862
cg07095347	-0.0625804
cg07101980	-0.179984
cg07172885	0.0431244
cg07207669	0.621857
cg07211259	-1.73881
cg07248223	-0.333581
cg07319199	0.00419547
cg07320140	-0.363923
cg07374224	0.05776
cg07502389	1.30376
cg07536102	0.150338
cg07547549	2.86908
cg07571951	-0.518756
cg07584066	0.296519
cg07717903	0.0198209
cg07810190	0.156402
cg07825606	-0.182515
cg07850154	-1.45069
cg07850604	0.0370986
cg07955995	0.690613
cg07978099	-0.0373258
cg08038054	-0.287915
cg08097417	9.49093
cg08151809	-0.894466
cg08234504	-0.578659
cg08276993	-0.0495255
cg08313880	-0.526706
cg08329113	0.452213
cg08357125	-0.395598
cg08397927	-0.921548
cg08429256	-0.220765
cg08468401	-0.31667
cg08540945	0.0327826
cg08573679	-1.11048
cg08657705	0.117782
cg08761208	-0.0473703
cg08822715	-0.428659
cg08908643	0.325778
cg08963419	-0.73969
cg09118625	0.16742
cg09143195	-0.933003
cg09164913	-0.232717
cg09255514	0.0465908
cg09315264	0.0286469
cg09383860	-0.608708
cg09432590	1.04898
cg09524078	-0.0135118
cg09604333	-0.703968
cg09624858	0.109877
cg09652142	-0.612585
cg09692396	-1.46773
cg09748749	-0.290687
cg09809672	-0.394339
cg09929187	-0.724864
cg09935271	-0.0730435
cg10036013	0.0329773
cg10052840	-0.411192
cg10106965	-0.16337
cg10203610	-0.724288
cg10453071	-0.156657
cg10495047	0.0168878
cg10619342	-0.0897889
cg10625705	3.9362
cg10647101	-0.0756504
cg10658666	0.0844712
cg10772169	-0.194439
cg10804656	1.51523
cg10905180	-0.19222
cg10917602	-0.494595
cg11006267	0.120274
cg11051055	0.158895
cg11067179	0.997659
cg11084334	0.349242
cg11136562	-0.108325
cg11220950	0.837358
cg11271171	0.0481686
cg11491284	-1.4363
cg11653233	0.187455
cg11714320	-0.866081
cg11718162	0.00381602
cg11789321	0.0718485
cg11807280	-0.228537
cg11830800	-0.341398
cg11832534	-0.0667965
cg11858226	-0.446934
cg12068124	-0.00953889
cg12134570	-1.15078
cg12138483	0.00898639
cg12145907	0.202883
cg12258344	-1.13627
cg12350474	-0.0334644
cg12379720	0.0152952
cg12402251	0.758705
cg12419932	0.515326
cg12424329	-0.191604
cg12477880	-0.162336
cg12490835	0.26038
cg12506930	0.22843
cg12578166	-1.57874
cg12649038	0.076684
cg12757684	-0.755071
cg12788037	0.346087
cg12899747	-0.519947
cg12934320	0.0524171
cg12939283	-0.153405
cg12948621	0.217174
cg12968224	0.14814
cg13029847	2.73123
cg13033858	0.0284482
cg13149736	-0.0428242
cg13278496	0.0204878
cg13388466	0.0345746
cg13409704	-0.373199
cg13491731	0.089107
cg13567282	-0.114385
cg13575542	-0.0154032
cg13593287	-0.526551
cg13612317	-0.382691
cg13615100	0.0211542
cg13617776	-0.0115245
cg13663218	-0.633064
cg13674411	-0.0312975
cg13824500	0.0132813
cg13917614	-0.236056
cg13937040	-0.199382
cg14010720	-0.611987
cg14074174	-0.41289
cg14098795	-0.69992
cg14162417	1.08898
cg14209784	-1.25127
cg14224203	-0.00494191
cg14314729	-0.203289
cg14359680	-0.298554
cg14699004	-0.420122
cg14746276	-0.614164
cg14748856	0.0410258
cg14753631	0.349387
cg14757228	0.246315
cg14776578	-0.0777081
cg14847502	0.246605
cg14911690	1.64679
cg15059474	0.392934
cg15089077	0.0112348
cg15110296	-0.623739
cg15220605	-0.0331
cg15277914	-0.275517
cg15338967	0.975162
cg15339075	0.0167759
cg15393490	-0.989496
cg15519474	-0.582424
cg15553770	0.0197169
cg15603896	0.00853872
cg15648389	0.170367
cg15673540	-0.505117
cg15845821	-0.00591168
cg15900052	0.239002
cg15903032	-0.379471
cg15936446	1.11442
cg16032108	0.0150109
cg16419235	0.947873
cg16477091	0.0288707
cg16584662	0.000583156
cg16608498	0.427345
cg16618104	-0.335582
cg16717122	0.136883
cg16867657	7.3233
cg17110586	1.76788
cg17163168	0.0998583
cg17168836	-0.143114
cg17183905	-0.0099181
cg17243289	2.17703
cg17254383	0.0250945
cg17338821	1.38362
cg17472796	-0.255483
cg17607231	-0.182472
cg17616646	-0.209244
cg17621438	-1.21229
cg17769442	0.0097916
cg17782713	-0.978544
cg17953385	-0.307686
cg18064714	0.037971
cg18125510	-0.0861453
cg18240463	-0.0247872
cg18281842	0.0614475
cg18310639	-0.370169
cg18335931	-0.194809
cg18343474	0.252097
cg18448426	-0.843144
cg18450254	-0.014959
cg18457597	-0.356152
cg18468088	1.72094
cg18537454	0.068831
cg18875012	-0.0385856
cg18917643	0.187074
cg18933331	-0.787949
cg19031565	0.971503
cg19034084	-0.21908
cg19166302	-0.0247357
cg19283806	-1.31523
cg19343530	0.12665
cg19505546	0.0165005
cg19583819	1.19232
cg19596273	1.51504
cg19663246	-0.233381
cg19722847	-0.665413
cg19761273	-0.8275
cg19789753	-0.00922594
cg20050761	-0.02535
cg20052760	-0.233508
cg20149168	0.647836
cg20322193	0.326624
cg20324262	-0.0295471
cg20420249	0.000762243
cg20492951	-0.732915
cg20515136	-0.0933648
cg20525917	0.0323153
cg20592391	0.136208
cg20665157	0.382983
cg20756600	-0.0779932
cg20761322	0.0353914
cg20822990	-0.4004
cg20960181	0.0229923
cg20964423	-0.100376
cg20988565	-0.187166
cg21072934	-0.0183482
cg21116457	-0.0523723
cg21144928	0.125547
cg21159778	0.177004
cg21184711	0.381119
cg21186299	1.39571
cg21251970	-0.0923723
cg21515349	0.79092
cg21563471	-0.373101
cg21567504	0.653224
cg21631428	0.190947
cg21674704	0.955665
cg21809447	0.367879
cg21860825	0.0684996
cg21867345	0.327516
cg21874213	-2.17358
cg21899500	1.90817
cg21949781	-0.801374
cg22016779	-0.289342
cg22073802	0.00108179
cg22112832	-0.156972
cg22156456	-0.965309
cg22162281	0.154887
cg22185977	-0.212529
cg22197050	0.491843
cg22282410	0.0309658
cg22296808	0.0188366
cg22352234	-0.602948
cg22358580	0.795712
cg22378065	-0.825476
cg22452230	-0.544895
cg22454769	1.53667
cg22517995	0.916689
cg22580512	-0.676567
cg22682373	0.35083
cg22708738	0.129247
cg22793142	-1.28514
cg22809047	1.19027
cg22864500	0.0984407
cg22881141	0.724962
cg22971191	0.0499116
cg23008153	-0.45907
cg23078123	-1.39834
cg23097079	-0.227551
cg23159704	-0.127343
cg23174607	0.0145583
cg23357854	-0.316937
cg23361092	0.456957
cg23373640	0.0474707
cg23460961	-0.0062373
cg23500537	2.27386
cg23510258	-0.00745641
cg23510764	-0.373472
cg23538901	0.0395772
cg23552977	-1.38199
cg23606718	3.43595
cg23615741	-0.709323
cg23712970	-0.672194
cg23718736	-0.209973
cg23744638	-0.853536
cg23753748	-0.117257
cg23808301	-0.572062
cg23829395	0.171055
cg23836737	-0.593376
cg23858532	0.509127
cg23889772	-0.055483
cg23900712	0.295901
cg23995914	0.619037
cg24090911	0.0843393
cg24091819	0.0522859
cg24150153	0.83897
cg24169822	0.0528082
cg24173182	-0.203955
cg24349631	-0.0297597
cg24350475	-0.887927
cg24403644	0.727054
cg24550456	0.295685
cg24611351	-0.00181074
cg24620508	0.058482
cg24696028	-2.33084
cg24711649	-0.349263
cg24745327	0.546919
cg24788483	-1.45371
cg24845578	-0.957581
cg24862131	-0.0560999
cg24883498	-0.459499
cg24891133	0.4351
cg24987259	-1.3317
cg25148589	0.459395
cg25149218	0.00148427
cg25178749	-0.0818283
cg25305703	0.0915463
cg25309888	0.077441
cg25386151	-0.629018
cg25410668	2.01765
cg25415508	-1.08798
cg25450819	0.0770463
cg25478614	1.10843
cg25618424	1.12332
cg25838150	-0.0372751
cg25909396	-1.27181
cg26105310	-0.0332456
cg26116103	-0.0839742
cg26147845	-0.0930439
cg26158023	-1.42418
cg26469387	1.36235
cg26483332	-1.23942
cg26614073	-0.270511
cg26668490	-0.0731204
cg26685941	-0.281599
cg26725786	0.0763341
cg26765385	-0.199449
cg26833936	0.186957
cg26921969	0.876002
cg26925981	0.107091
cg27021512	-0.937957
cg27059819	0.306525
cg27168858	0.0682559
cg27338353	0.071742
cg27367526	-0.525368
cg27386529	-0.316696
cg27430293	-0.626291
cg27432653	1.01508
cg27447740	-0.136931
cg27455578	-0.0852074
cg27508620	0.0560996
cg27597505	0.13978
cg27619353	-0.336007
cg27640528	-0.234369

## Sheet: McEwen-94 Clock (2019)
Table S5: Methylation sites and respective coefficients/weights for methylation clocks
Site	Coefficient
(Intercept)	-2.09735
cg00059225	0.02196
cg00085493	-0.100396
cg00095976	0.00787242
cg00609333	0.0228236
cg01287592	-0.0554147
cg01704999	-0.0975745
cg02209075	0.138201
cg02310103	-0.0840107
cg02426178	-0.358361
cg02821342	-0.130267
cg02980055	-0.138766
cg03020208	0.210385
cg03466124	-0.0223111
cg03473016	0.000155411
cg03493146	-0.162409
cg03555227	0.638584
cg04221461	0.0345747
cg04452203	-0.0269893
cg04937184	-0.0542371
cg04948475	-0.000821517
cg05024939	0.148855
cg05271255	-0.12492
cg05923197	0.0392915
cg05928290	0.158903
cg06048436	-0.1549
cg06144905	0.315241
cg06198384	0.00352539
cg06416491	-0.192419
cg06430061	-0.0172049
cg06455149	0.0863761
cg06712013	-0.0464243
cg07066898	0.0658037
cg07638500	-0.0256171
cg07809484	0.0653081
cg08207604	-0.107193
cg08448547	0.0591289
cg09367901	0.0414744
cg09678615	-0.0838694
cg10308629	-0.0944786
cg11071401	0.228791
cg11084334	0.0273691
cg11092416	-0.0863217
cg11117945	-0.00583954
cg11298786	-0.0983064
cg11529819	-0.0869053
cg11705975	0.183942
cg11804928	-0.247572
cg12483947	-0.00635405
cg13462622	0.0397058
cg13739066	0.0468999
cg13783238	0.00355186
cg13848598	0.0486309
cg14676592	0.141166
cg15774391	-0.141505
cg16181396	0.0920047
cg16243756	0.0721564
cg16314254	0.12403
cg16374999	0.0207905
cg16514113	0.323002
cg16618789	0.154988
cg16703882	0.10204
cg16852756	-0.0549764
cg16867657	0.474126
cg17882660	0.0432462
cg18244483	0.218064
cg18826352	0.0883036
cg19203457	0.0933049
cg19381811	-0.0756815
cg19662687	-0.0313695
cg20283670	-0.137207
cg20397034	-0.676483
cg20704560	-0.034571
cg20755989	0.191681
cg20847090	0.00932698
cg20897936	0.194982
cg21515406	0.00622227
cg21572722	0.648412
cg22281505	-0.0433546
cg23500537	0.0758496
cg23586440	0.00911797
cg23731991	-0.0711216
cg24374161	-0.112505
cg24441922	-0.154795
cg24739596	0.00335237
cg24881205	0.0446724
cg24996883	-0.242318
cg25062539	-0.348917
cg25936902	-0.0483904
cg26535072	-0.147219
cg26650655	-0.0640927
cg26718511	0.181471
cg27061971	0.135431
cg27396655	-0.330628
cg27437510	0.112163

[truncated: 7 more sheets: DNAm PhenoAge, PCHannum, PCHorvath1, PCHorvath2, PCLin, PCZhang, PCPhenoAge]
