# Supplementary material for: Epigenetic estimates reveal a species-specific extension of lifespan in modern humans
Source: Research Square preprint supplement (doi:10.21203/rs.3.rs-8101134/v1), 2026-01-29
Supplement: Supplementary file 4 [file d76d80bc1d95bfd3a9c11d1d.xlsx]

## Sheet: Legend
Table S6: Methylation values of target sites extracted from archaic hominin DNAm maps
This table comprises 4 subtables, each listing methylation values for target sites derived from either original clocks or PC-guided clocks, based on DNAm maps from Neandertals or Denisovans. Chromosomal location of each methylation site is presented. Note that the beta value of a site failed to match is set to zero, reflecting the perspective that the site could not be matched due to the absence …

## Sheet: Neandertal (Original Clocks)
Table S6: Methylation values of target sites extracted from archaic hominin DNAm maps
Site	Chromosome	Beta Value	Matched
cg00017842	chr2	0.823246	TRUE
cg00059225	chr5	0	TRUE
cg00073460	chr6	0.409711	TRUE
cg00075967	chr15	1	TRUE
cg00079056	chr9	0.759834	TRUE
cg00083937	chr22	0.11237	TRUE
cg00085493	chr1	1	TRUE
cg00091693	chr17	1	TRUE
cg00095976	chr6	0.547724	TRUE
cg00096065	chr5	0.396091	TRUE
cg00113951	chr12	0.246909	TRUE
cg00168942	chr10	1	TRUE
cg00194146	chr6	0	TRUE
cg00230271	chr4	0	TRUE
cg00241664	chr16	1	TRUE
cg00257455	chr1	0.504315	TRUE
cg00261781	chr2	0.0579784	TRUE
cg00271522	chr7	0	TRUE
cg00297600	chr8	0.805181	TRUE
cg00302979	chr4	1	TRUE
cg00335286	chr18	0.618979	TRUE
cg00338702	chr12	0.665858	TRUE
cg00343092	chr22	0.0619635	TRUE
cg00347775	chr22	1	TRUE
cg00350702	chr20	0	TRUE
cg00374717	chr17	0.519406	TRUE
cg00410898	chr8	0.158279	TRUE
cg00412772	chr19	0.438104	TRUE
cg00412805	chr3	0.472445	TRUE
cg00431549	chr12	0.634144	TRUE
cg00436603	chr10	0.622185	TRUE
cg00454305	chr16	0	TRUE
cg00462994	chr17	0	TRUE
cg00463859	chr1	0	TRUE
cg00481951	chr3	0.34959	TRUE
cg00486113	chr6	0.667978	TRUE
cg00489401	chr5	0	TRUE
cg00503840	chr7	0	TRUE
cg00515905	chr1	1	TRUE
cg00522231	chr2	0.339263	TRUE
cg00548098	chr16	0.939242	TRUE
cg00563932	chr9	0.578545	TRUE
cg00582628	chr8	1	TRUE
cg00593462	chr13	0.625926	TRUE
cg00609333	chr12	0.872657	TRUE
cg00658652	chr16	0.766585	TRUE
cg00687674	chr15	1	TRUE
cg00702638	chr3	0	TRUE
cg00717297	chr12	0.718113	TRUE
cg00740914	chr2	1	TRUE
cg00744433	chr21	1	TRUE
cg00748589	chr12	0.0744252	TRUE
cg00753885	chr12	0	FALSE
cg00756943	chr15	0	TRUE
cg00760938	chr2	0.464641	TRUE
cg00772585	chr4	1	TRUE
cg00793186	chr5	0.666169	TRUE
cg00795927	chr7	0	TRUE
cg00797278	chr3	0	TRUE
cg00805193	chr20	0.358908	TRUE
cg00845900	chr7	1	TRUE
cg00850073	chr5	0.183577	TRUE
cg00862290	chr3	0.922621	TRUE
cg00864867	chr12	0.133731	TRUE
cg00910503	chr17	0.896179	TRUE
cg00925087	chr2	0.630575	TRUE
cg00943950	chr5	0.0187303	TRUE
cg00945507	chr7	0.500935	TRUE
cg00955230	chr7	0.143693	TRUE
cg00991848	chr16	0	TRUE
cg01027739	chr9	0.0908965	TRUE
cg01027805	chr14	0	TRUE
cg01031400	chr8	0	TRUE
cg01054110	chr12	0	TRUE
cg01055824	chr14	0.428592	TRUE
cg01055871	chr19	0.490119	TRUE
cg01056568	chr17	0.669737	TRUE
cg01059398	chr3	1	TRUE
cg01114088	chr4	0.0574524	TRUE
cg01128603	chr11	0.0375986	TRUE
cg01131735	chr17	0	TRUE
cg01136606	chr8	0.97611	TRUE
cg01137065	chr17	0.0678289	TRUE
cg01141812	chr6	0.350908	TRUE
cg01176329	chr6	0.639516	TRUE
cg01196788	chr2	0	TRUE
cg01211097	chr16	0.410413	TRUE
cg01221637	chr20	0.00484245	TRUE
cg01222316	chr17	0.077039	TRUE
cg01226614	chr13	0.350963	TRUE
cg01234063	chr11	0	TRUE
cg01243072	chr2	0.570352	TRUE
cg01252496	chr19	0.0657482	TRUE
cg01254459	chr14	0	TRUE
cg01256539	chr5	0.297632	TRUE
cg01261503	chr17	0	TRUE
cg01262913	chr21	0.159274	TRUE
cg01287592	chr8	0	TRUE
cg01331772	chr2	0.368456	TRUE
cg01335367	chr12	0.711649	TRUE
cg01353448	chr7	1	TRUE
cg01356950	chr2	0.0341217	TRUE
cg01364769	chr10	1	TRUE
cg01400401	chr19	0.221637	TRUE
cg01407797	chr22	0.11732	TRUE
cg01433297	chr20	0.908945	TRUE
cg01435493	chr14	0.404095	TRUE
cg01441777	chr22	0.126042	TRUE
cg01447660	chr2	0.840631	TRUE
cg01450842	chr2	0.528623	TRUE
cg01459453	chr1	0.88395	TRUE
cg01485645	chr17	0	TRUE
cg01511232	chr4	0.236856	TRUE
cg01511567	chr11	0.0955481	TRUE
cg01519742	chr4	0	TRUE
cg01527307	chr6	1	TRUE
cg01528542	chr12	1	TRUE
cg01542719	chr3	0.749176	TRUE
cg01560871	chr10	1	TRUE
cg01570885	chr6	0.995053	TRUE
cg01584473	chr7	0.993686	TRUE
cg01620164	chr2	0.16264	TRUE
cg01623187	chr20	0.830946	TRUE
cg01626227	chr7	0.65784	TRUE
cg01644850	chr19	0.00306108	TRUE
cg01651821	chr2	0.191712	TRUE
cg01656216	chr10	1	TRUE
cg01704999	chr15	0.93323	TRUE
cg01738984	chr11	0	FALSE
cg01739167	chr17	0.634142	TRUE
cg01740766	chr6	0.169559	TRUE
cg01752203	chr2	0.136799	TRUE
cg01757168	chr3	0	TRUE
cg01792616	chr16	0.814614	TRUE
cg01794929	chr22	0.531178	TRUE
cg01820374	chr12	0.447275	TRUE
cg01820962	chr6	0.828578	TRUE
cg01832549	chr1	0.98639	TRUE
cg01844642	chr3	0.116745	TRUE
cg01873645	chr9	0	TRUE
cg01873886	chr14	0	TRUE
cg01883408	chr5	0.657574	TRUE
cg01892695	chrX	0.587995	TRUE
cg01918706	chr1	0	TRUE
cg01930621	chr19	0.25534	TRUE
cg01946401	chr6	0.587879	TRUE
cg01949403	chr22	0.707874	TRUE
cg01968178	chr2	0	TRUE
cg02001279	chr19	0	TRUE
cg02016419	chr17	0.280935	TRUE
cg02018902	chr15	0.143036	TRUE
cg02025827	chr16	0.048338	TRUE
cg02037503	chr14	0.227165	TRUE
cg02046143	chr11	0.267148	TRUE
cg02047577	chr20	0	TRUE
cg02071305	chr15	0	TRUE
cg02085507	chr19	0.148009	TRUE
cg02085953	chr2	0.200414	TRUE
cg02151301	chr20	0.079252	TRUE
cg02151816	chr6	0.595364	TRUE
cg02154074	chr2	0.276057	TRUE
cg02181968	chr12	0	TRUE
cg02197293	chr19	0	TRUE
cg02204637	chr5	0.278629	TRUE
cg02209075	chr22	1	TRUE
cg02217159	chr6	0.378039	TRUE
cg02228185	chr17	1	TRUE
cg02229946	chr2	1	TRUE
cg02244028	chr3	1	TRUE
cg02272599	chr19	0.351022	TRUE
cg02275294	chr1	0	TRUE
cg02281167	chr6	0.144889	TRUE
cg02309431	chr20	1	TRUE
cg02310103	chr3	0.59579	TRUE
cg02328239	chr5	0	TRUE
cg02331561	chr16	0	TRUE
cg02332492	chr9	0.965649	TRUE
cg02335441	chr3	0.227215	TRUE
cg02355868	chr16	0.597114	TRUE
cg02364642	chr12	0.306285	TRUE
cg02383785	chr7	0.105209	TRUE
cg02388150	chr8	0.0990473	TRUE
cg02426178	chr19	0.118136	TRUE
cg02426324	chr7	1	TRUE
cg02452500	chr11	1	TRUE
cg02479575	chr19	0.235784	TRUE
cg02480835	chr7	0.101837	TRUE
cg02489552	chr19	0.169959	TRUE
cg02497428	chr16	0.842667	TRUE
cg02503970	chr8	0	TRUE
cg02532488	chr11	0.0489295	TRUE
cg02533423	chr7	0	TRUE
cg02580606	chr17	1	TRUE
cg02631957	chr5	0	TRUE
cg02650266	chr4	0.370966	TRUE
cg02654291	chr9	0.355233	TRUE
cg02735486	chr4	1	TRUE
cg02762363	chr5	0.135214	TRUE
cg02795076	chr12	0	TRUE
cg02802055	chr9	0.024544	TRUE
cg02821342	chr7	0.0185519	TRUE
cg02827112	chr4	0.407772	TRUE
cg02836046	chr21	0.608826	TRUE
cg02838492	chr9	0.188135	TRUE
cg02844545	chr6	0	TRUE
cg02867102	chr17	0.61859	TRUE
cg02871659	chr16	0	TRUE
cg02901139	chr1	0.765417	TRUE
cg02972551	chr2	0	TRUE
cg02976574	chr3	0.791977	TRUE
cg02980055	chr8	1	TRUE
cg02994956	chr22	0	TRUE
cg03007010	chr19	0	TRUE
cg03019000	chr3	0.209022	TRUE
cg03020208	chr12	0.150533	TRUE
cg03025830	chr8	0.344568	TRUE
cg03032497	chr14	1	TRUE
cg03039990	chr14	0.803399	TRUE
cg03076094	chr16	0.304933	TRUE
cg03103192	chr4	0.690739	TRUE
cg03112869	chr3	0.940233	TRUE
cg03163545	chr16	0.56312	TRUE
cg03167275	chr21	0	TRUE
cg03172991	chr19	0.836696	TRUE
cg03183882	chr3	0.109989	TRUE
cg03224418	chr20	0.264944	TRUE
cg03232933	chr21	0.417009	TRUE
cg03234186	chr19	0.328587	TRUE
cg03258472	chr19	0.66817	TRUE
cg03261929	chr13	0.426187	TRUE
cg03270204	chr6	0.149815	TRUE
cg03286783	chr15	0	TRUE
cg03330058	chr3	0.145498	TRUE
cg03340261	chr6	0	TRUE
cg03340878	chr6	1	TRUE
cg03361973	chr15	0.953741	TRUE
cg03364683	chr4	0.660082	TRUE
cg03387497	chr20	0.907986	TRUE
cg03399905	chr15	0.452419	TRUE
cg03421353	chr5	0.0883837	TRUE
cg03466124	chr3	0.238643	TRUE
cg03467555	chr16	0.0858881	TRUE
cg03473016	chr3	1	TRUE
cg03473532	chr7	1	TRUE
cg03486383	chr16	0.633503	TRUE
cg03493146	chr7	0.277137	TRUE
cg03527802	chr16	0	TRUE
cg03535648	chr12	1	TRUE
cg03555227	chr5	0.0442024	TRUE
cg03565081	chr14	0.163609	TRUE
cg03565323	chr17	0.371319	TRUE
cg03578041	chr15	0.502775	TRUE
cg03588357	chr14	0	TRUE
cg03607117	chr3	0	TRUE
cg03619256	chr7	0.446477	TRUE
cg03623878	chr13	0.303613	TRUE
cg03633574	chr3	0.768371	TRUE
cg03638795	chr11	0.0322261	TRUE
cg03643998	chr17	0	TRUE
cg03646329	chr13	0.604362	TRUE
cg03670162	chr12	0.390647	TRUE
cg03682823	chr7	0.564677	TRUE
cg03703325	chr3	0	TRUE
cg03724882	chr14	0.0193796	TRUE
cg03746976	chr16	0.563819	TRUE
cg03760483	chr17	0	TRUE
cg03771840	chr6	0.427818	TRUE
cg03773862	chr7	0.929037	TRUE
cg03788004	chr12	0	TRUE
cg03819692	chr16	1	TRUE
cg03891319	chr3	0.369347	TRUE
cg03894990	chr6	0.430769	TRUE
cg03915012	chr4	0.972863	TRUE
cg03929796	chr3	0.539551	TRUE
cg03947362	chr2	0.0253732	TRUE
cg03957108	chr2	0	TRUE
cg03958979	chr6	0.0579784	TRUE
cg03977782	chr3	0	TRUE
cg03984502	chr1	0.818831	TRUE
cg03991512	chr16	0.597585	TRUE
cg04005032	chr3	0	TRUE
cg04007936	chr16	0.217166	TRUE
cg04014889	chr15	0.948437	TRUE
cg04027548	chr12	0.476546	TRUE
cg04031656	chr16	0.512676	TRUE
cg04036898	chr1	0.136751	TRUE
cg04055490	chr17	0	TRUE
cg04081402	chr22	0.572521	TRUE
cg04084157	chr7	0	TRUE
cg04087608	chr1	0.964423	TRUE
cg04092800	chr5	0	TRUE
cg04094160	chr9	0	TRUE
cg04105923	chr6	1	TRUE
cg04121983	chr17	0	TRUE
cg04123409	chr12	0.795328	TRUE
cg04126866	chr10	0.605554	TRUE
cg04144218	chr7	0.798767	TRUE
cg04149978	chr1	0.675957	TRUE
cg04169469	chr2	0	TRUE
cg04200607	chr10	0	TRUE
cg04218760	chr10	0.733966	TRUE
cg04221461	chr1	0.519907	TRUE
cg04267101	chr17	0.772021	TRUE
cg04268405	chr10	0.550324	TRUE
cg04333463	chr8	0	TRUE
cg04359302	chr3	1	TRUE
cg04361926	chr16	0.338458	TRUE
cg04400972	chr1	0.297113	TRUE
cg04416734	chr16	0.104381	TRUE
cg04416752	chr9	0	TRUE
cg04424621	chr6	0.410464	TRUE
cg04431054	chr5	0.118283	TRUE
cg04436528	chr8	0.739114	TRUE
cg04452203	chr4	1	TRUE
cg04452713	chr6	0.418548	TRUE
cg04474832	chr3	0	TRUE
cg04480914	chr11	0	TRUE
cg04521765	chr10	0.254655	TRUE
cg04528819	chr7	0.0721824	TRUE
cg04576021	chr6	1	TRUE
cg04596060	chr12	0.492167	TRUE
cg04601137	chr19	0.526501	TRUE
cg04604946	chr12	0	TRUE
cg04616566	chr15	0.602279	TRUE
cg04621728	chr2	1	TRUE
cg04642300	chr6	0.795988	TRUE
cg04646282	chr15	1	TRUE
cg04662594	chr8	1	TRUE
cg04684267	chr19	0	TRUE
cg04709900	chr2	0	TRUE
cg04718414	chr13	0.282243	TRUE
cg04736140	chr1	0	TRUE
cg04749507	chr6	0	TRUE
cg04755031	chr22	0	TRUE
cg04757168	chr6	0.422948	TRUE
cg04818845	chr1	0.143307	TRUE
cg04836038	chr13	0	TRUE
cg04858164	chr15	1	TRUE
cg04861640	chr6	0	FALSE
cg04875128	chr15	0	TRUE
cg04937184	chr14	0.647712	TRUE
cg04940570	chr11	0	TRUE
cg04948475	chr4	1	TRUE
cg04955333	chr7	0.066451	TRUE
cg04999352	chr11	1	TRUE
cg04999691	chr7	0.880999	TRUE
cg05024939	chr4	0	TRUE
cg05087948	chr11	0.0543948	TRUE
cg05089968	chr6	0.588428	TRUE
cg05106770	chr4	0.463813	TRUE
cg05125838	chr3	0.83207	TRUE
cg05228408	chr1	0.0671362	TRUE
cg05250458	chr19	0.223421	TRUE
cg05262777	chr11	0.939949	TRUE
cg05270634	chr17	0.161477	TRUE
cg05271255	chr17	0.934373	TRUE
cg05294243	chr19	0.594205	TRUE
cg05294455	chr17	1	TRUE
cg05294577	chr14	0.786233	TRUE
cg05308819	chr1	0.981272	TRUE
cg05310309	chr2	0.739675	TRUE
cg05316065	chr8	1	TRUE
cg05324516	chr10	0.505208	TRUE
cg05331214	chr2	1	TRUE
cg05365729	chr8	0.162873	TRUE
cg05379350	chr17	0	TRUE
cg05422352	chr2	0.341854	TRUE
cg05436231	chr1	0.227057	TRUE
cg05440289	chr1	0.352482	TRUE
cg05441133	chr10	0.987598	TRUE
cg05442902	chr22	0.144889	TRUE
cg05468948	chr6	0.455082	TRUE
cg05473871	chr19	0	TRUE
cg05488632	chr19	0.0437156	TRUE
cg05492270	chr11	0	TRUE
cg05496363	chr11	0.30497	TRUE
cg05501584	chr15	0.0759837	TRUE
cg05516505	chr22	0	TRUE
cg05522498	chr11	1	TRUE
cg05532892	chr11	0.211482	TRUE
cg05542681	chr16	0	TRUE
cg05546763	chr14	0.162498	TRUE
cg05590257	chr17	0.132903	TRUE
cg05612876	chr12	0.594764	TRUE
cg05675373	chr1	0.0176836	TRUE
cg05694095	chr5	1	TRUE
cg05697249	chr11	0.720141	TRUE
cg05755779	chr8	1	TRUE
cg05759269	chr6	0.25534	TRUE
cg05780020	chr7	1	TRUE
cg05847778	chr2	0	TRUE
cg05851163	chr18	0	TRUE
cg05898102	chr5	0.800977	TRUE
cg05898618	chr11	1	TRUE
cg05903609	chr17	0	TRUE
cg05915866	chr16	0.20431	TRUE
cg05921699	chr19	1	TRUE
cg05923197	chr14	0.364601	TRUE
cg05923226	chr19	0.169959	TRUE
cg05928290	chr14	0.471726	TRUE
cg05928581	chr11	0	TRUE
cg05940231	chr1	0.588293	TRUE
cg05940691	chr1	0.49093	TRUE
cg05960024	chr4	0.812283	TRUE
cg05960039	chr20	0.411643	TRUE
cg05998295	chr8	0.459555	TRUE
cg06007201	chr16	0	TRUE
cg06044899	chr4	1	TRUE
cg06048436	chr13	0.605053	TRUE
cg06068163	chr7	1	TRUE
cg06083669	chr20	0.406368	TRUE
cg06112560	chr16	0.503723	TRUE
cg06117855	chr3	0.616482	TRUE
cg06121469	chr15	0.149943	TRUE
cg06134964	chr3	1	TRUE
cg06144905	chr17	0.726636	TRUE
cg06171242	chr6	0.157123	TRUE
cg06189653	chr5	0.0442583	TRUE
cg06198384	chr1	0.0682121	TRUE
cg06231995	chr9	0	TRUE
cg06291867	chr10	0	TRUE
cg06295856	chr11	0.0430764	TRUE
cg06326667	chr10	0.992257	TRUE
cg06327515	chr5	0.726027	TRUE
cg06335143	chr1	0	TRUE
cg06361108	chr16	0.441322	TRUE
cg06363129	chr7	0.383112	TRUE
cg06396324	chr19	1	TRUE
cg06416491	chr12	0.23062	TRUE
cg06419846	chr11	0.32711	TRUE
cg06430061	chr5	0.790065	TRUE
cg06448705	chr5	0.819903	TRUE
cg06455149	chr8	0	TRUE
cg06457011	chr20	0.0654408	TRUE
cg06458239	chr19	0.324052	TRUE
cg06462220	chr6	1	TRUE
cg06462291	chr12	0.173464	TRUE
cg06493994	chr6	0	TRUE
cg06513075	chr11	0.177792	TRUE
cg06526721	chr5	0.407583	TRUE
cg06532163	chr17	0.258239	TRUE
cg06533629	chr7	0.372077	TRUE
cg06547285	chr12	1	TRUE
cg06557358	chr17	0	TRUE
cg06574422	chr12	0.117536	TRUE
cg06637774	chr11	0.318637	TRUE
cg06638433	chr17	0.00238768	TRUE
cg06638451	chr3	0.693548	TRUE
cg06639320	chr2	0.0866235	TRUE
cg06648759	chr13	0.832649	TRUE
cg06672696	chr3	1	TRUE
cg06685111	chr6	0.410624	TRUE
cg06688848	chr16	0	TRUE
cg06690548	chr4	0.616335	TRUE
cg06712013	chr12	0.85504	TRUE
cg06737494	chr3	0	TRUE
cg06738602	chr14	0.097483	TRUE
cg06758350	chr21	0	TRUE
cg06784991	chr1	0	TRUE
cg06796779	chr3	0.035243	TRUE
cg06805925	chr17	0.819869	TRUE
cg06810647	chr16	0.144648	TRUE
cg06819923	chr16	1	TRUE
cg06836406	chr9	0.136888	TRUE
cg06836772	chr1	0.25092	TRUE
cg06852243	chr17	1	TRUE
cg06874016	chr17	0.392053	TRUE
cg06888746	chr10	1	TRUE
cg06908778	chr10	0	TRUE
cg06926735	chr20	0.379698	TRUE
cg06952310	chr19	0.909839	TRUE
cg06958034	chr1	0	TRUE
cg06975499	chr17	0	TRUE
cg06993413	chr15	0.192354	TRUE
cg06994793	chr5	0.463428	TRUE
cg07016730	chr22	0.555835	TRUE
cg07038400	chr3	0.222993	TRUE
cg07040244	chr1	0.187487	TRUE
cg07066898	chr19	0	TRUE
cg07073120	chr17	0	TRUE
cg07073964	chr19	1	TRUE
cg07077459	chr6	1	TRUE
cg07080372	chr11	0	TRUE
cg07082267	chr16	0.326458	TRUE
cg07095347	chr6	0.890126	TRUE
cg07101980	chr11	1	TRUE
cg07110949	chr4	1	TRUE
cg07115626	chr14	0.0390789	TRUE
cg07158339	chr9	0.603714	TRUE
cg07172885	chr12	0.560546	TRUE
cg07180649	chr1	0.514775	TRUE
cg07207669	chr1	0	TRUE
cg07211259	chr9	0.653876	TRUE
cg07236943	chr7	0.0188169	TRUE
cg07248223	chr17	0.767839	TRUE
cg07265300	chr2	0.180985	TRUE
cg07285276	chr9	0.934875	TRUE
cg07291563	chr19	0.0508476	TRUE
cg07303143	chr3	0	TRUE
cg07312601	chr1	1	TRUE
cg07319199	chr2	1	TRUE
cg07320140	chr16	0.7012	TRUE
cg07337598	chr1	1	TRUE
cg07374224	chr21	0.442676	TRUE
cg07388493	chr1	0.243919	TRUE
cg07408456	chr19	0.612158	TRUE
cg07455279	chr19	0	TRUE
cg07484827	chr11	0.76075	TRUE
cg07494518	chr21	0	TRUE
cg07498421	chr12	0.180628	TRUE
cg07502389	chr8	0	TRUE
cg07536102	chr17	0.0136633	TRUE
cg07547549	chr20	0	TRUE
cg07553761	chr3	0.135117	TRUE
cg07571951	chr7	0.0100398	TRUE
cg07583137	chr8	0.474361	TRUE
cg07584066	chr17	0.450311	TRUE
cg07589899	chr2	0.263481	TRUE
cg07595943	chr16	0.809837	TRUE
cg07621046	chr10	0.148531	TRUE
cg07638500	chr3	0.721811	TRUE
cg07654934	chr3	0.270691	TRUE
cg07663789	chr5	0	TRUE
cg07717903	chr5	0.041983	TRUE
cg07730301	chr11	0.180717	TRUE
cg07752420	chr9	0	FALSE
cg07770222	chr8	0.239037	TRUE
cg07809484	chr19	0.347642	TRUE
cg07810156	chr1	0.597761	TRUE
cg07810190	chr6	0.0754288	TRUE
cg07817698	chr16	0.169684	TRUE
cg07825606	chr16	0.465051	TRUE
cg07849904	chr22	0	TRUE
cg07850154	chr5	0.108019	TRUE
cg07850604	chr14	0	TRUE
cg07906193	chr10	1	TRUE
cg07927379	chr7	0	TRUE
cg07929310	chr16	0.170699	TRUE
cg07955995	chr7	0	TRUE
cg07978099	chr16	0	TRUE
cg08012287	chr11	0.426837	TRUE
cg08030082	chr2	0.315817	TRUE
cg08035942	chr18	0	TRUE
cg08038054	chr7	0.155647	TRUE
cg08067365	chr1	0.32921	TRUE
cg08074477	chr17	0.889916	TRUE
cg08090640	chr17	0.459862	TRUE
cg08090772	chr8	0.157598	TRUE
cg08097417	chr7	0	TRUE
cg08124722	chr17	1	TRUE
cg08151809	chr7	0.453236	TRUE
cg08166272	chr2	0	TRUE
cg08169325	chr12	0.152568	TRUE
cg08186124	chr3	0	TRUE
cg08207604	chr6	0.218506	TRUE
cg08209133	chr4	0	TRUE
cg08212685	chr5	0.0963543	TRUE
cg08234504	chr5	0.739994	TRUE
cg08251036	chr2	1	TRUE
cg08251399	chr2	0.0622813	TRUE
cg08276993	chr10	1	TRUE
cg08280936	chr7	0.211423	TRUE
cg08313880	chr17	0.222708	TRUE
cg08329113	chr16	0.721782	TRUE
cg08331960	chr16	0.239004	TRUE
cg08357125	chr2	0.317278	TRUE
cg08370996	chr15	0	TRUE
cg08397927	chr19	0	TRUE
cg08413469	chr1	0	TRUE
cg08415592	chr22	1	TRUE
cg08420066	chr6	0.388629	TRUE
cg08424423	chr6	1	TRUE
cg08429256	chr17	0	TRUE
cg08434234	chr7	0.45957	TRUE
cg08448547	chr8	1	TRUE
cg08454546	chr15	0.0962317	TRUE
cg08468401	chr3	0.710379	TRUE
cg08468689	chr17	0.197917	TRUE
cg08475827	chr2	0.689825	TRUE
cg08487374	chr7	0	TRUE
cg08529529	chr13	0.799505	TRUE
cg08540945	chr7	0.227188	TRUE
cg08573679	chr6	0.000465021	TRUE
cg08586737	chr7	0.562982	TRUE
cg08587542	chr5	1	TRUE
cg08598221	chr8	0.332429	TRUE
cg08622677	chr12	0	TRUE
cg08654655	chr1	0.304244	TRUE
cg08657705	chr5	1	TRUE
cg08668790	chr19	0.350727	TRUE
cg08694544	chr19	0.00456813	TRUE
cg08761208	chr15	1	TRUE
cg08771731	chr5	0.380055	TRUE
cg08822715	chr12	0.559889	TRUE
cg08872493	chr1	1	TRUE
cg08896629	chr19	0	TRUE
cg08899632	chr20	0.314737	TRUE
cg08900043	chr12	0	TRUE
cg08908643	chr5	1	TRUE
cg08911208	chr7	0.581213	TRUE
cg08949164	chr16	0	TRUE
cg08963419	chr19	0	TRUE
cg08965235	chr11	0.049692	TRUE
cg08993878	chr12	1	TRUE
cg09019938	chr10	0	TRUE
cg09025210	chr3	0.395625	TRUE
cg09045681	chr6	0.0984829	TRUE
cg09096950	chr11	0.335797	TRUE
cg09118625	chr1	1	TRUE
cg09133026	chr14	1	TRUE
cg09143195	chr12	0.22367	TRUE
cg09155044	chr16	0.331987	TRUE
cg09164913	chr17	0.299435	TRUE
cg09183146	chr16	0	TRUE
cg09191327	chr9	0	TRUE
cg09196959	chr6	1	TRUE
cg09254939	chr19	0	TRUE
cg09255514	chr16	0.883529	TRUE
cg09294589	chr3	0.463494	TRUE
cg09304040	chr12	0	TRUE
cg09315264	chr1	1	TRUE
cg09322949	chr6	0.412719	TRUE
cg09367901	chr14	0.282367	TRUE
cg09383860	chr11	0.947057	TRUE
cg09404633	chr1	0.0685584	TRUE
cg09413557	chr1	0	TRUE
cg09418283	chr12	0	TRUE
cg09428349	chr21	0.258584	TRUE
cg09432590	chr10	0	TRUE
cg09434995	chr7	0.817805	TRUE
cg09436502	chr7	0	TRUE
cg09441152	chr18	0	TRUE
cg09462576	chr1	0.614578	TRUE
cg09480837	chr10	1	TRUE
cg09509673	chr17	0.4961	TRUE
cg09524078	chr3	0.31164	TRUE
cg09548179	chr16	0	TRUE
cg09556292	chr14	0	TRUE
cg09604333	chr20	0.411643	TRUE
cg09624858	chr6	1	TRUE
cg09630437	chr19	0.40246	TRUE
cg09646392	chr13	0.751345	TRUE
cg09651136	chr15	0.206802	TRUE
cg09652142	chr3	0.761614	TRUE
cg09671951	chr10	0.0512364	TRUE
cg09678615	chr16	0.531516	TRUE
cg09692396	chr12	0	TRUE
cg09722397	chr17	0.0603042	TRUE
cg09722555	chr9	0.715789	TRUE
cg09748749	chr7	0.373984	TRUE
cg09785172	chr4	0	TRUE
cg09799873	chr19	0.745747	TRUE
cg09809672	chr1	0.719148	TRUE
cg09851465	chr1	0.851533	TRUE
cg09869858	chr12	1	TRUE
cg09885951	chr1	0	TRUE
cg09892203	chr17	0.0313598	TRUE
cg09929187	chr12	0.626006	TRUE
cg09935271	chr19	0.0497838	TRUE
cg09993145	chr1	0.753421	TRUE
cg10036013	chr7	0.151083	TRUE
cg10045881	chr1	0.335369	TRUE
cg10052840	chr19	0.426988	TRUE
cg10106965	chr3	0.0774178	TRUE
cg10158181	chr4	0	TRUE
cg10192196	chr6	0.252087	TRUE
cg10202457	chr1	0.313665	TRUE
cg10203610	chr4	0	TRUE
cg10225525	chr14	0.803425	TRUE
cg10266490	chr1	0.471307	TRUE
cg10281002	chr12	0.14759	TRUE
cg10308629	chr7	0.554271	TRUE
cg10345936	chr5	0.478452	TRUE
cg10376763	chr2	0.747208	TRUE
cg10377274	chr11	1	TRUE
cg10453071	chr16	0	TRUE
cg10486998	chr18	0	TRUE
cg10495047	chr5	0	TRUE
cg10498798	chr19	0.570887	TRUE
cg10501210	chr1	0.308002	TRUE
cg10523019	chr2	0	TRUE
cg10570177	chr9	0.104135	TRUE
cg10586358	chr19	0.411357	TRUE
cg10591174	chr12	0.8995	TRUE
cg10619342	chr15	0.695268	TRUE
cg10625705	chr20	0	TRUE
cg10636246	chr1	0.820438	TRUE
cg10636297	chr21	0.342897	TRUE
cg10644544	chr17	0	TRUE
cg10647101	chr22	0	TRUE
cg10654016	chr12	0	TRUE
cg10658666	chr2	0	TRUE
cg10667970	chr1	0.279929	TRUE
cg10669058	chr19	0.47325	TRUE
cg10699171	chr6	0.670912	TRUE
cg10699857	chr4	0	TRUE
cg10729426	chr19	0.324052	TRUE
cg10772169	chr1	0.433434	TRUE
cg10795646	chr1	1	TRUE
cg10804656	chr10	0	TRUE
cg10825530	chr11	0.934018	TRUE
cg10837404	chr5	1	TRUE
cg10855531	chr2	0.274762	TRUE
cg10865119	chr6	0	TRUE
cg10878896	chr12	0.0445219	TRUE
cg10900550	chr9	0.582614	TRUE
cg10905180	chr11	1	TRUE
cg10917602	chr16	0.048338	TRUE
cg10920957	chr16	0	TRUE
cg10922280	chr16	0.551215	TRUE
cg10940099	chr6	0	TRUE
cg10959651	chr2	1	TRUE
cg11006267	chr5	0.0323944	TRUE
cg11025793	chr19	0	TRUE
cg11051055	chr8	0.050596	TRUE
cg11067179	chr11	0.483861	TRUE
cg11071401	chr17	0	TRUE
cg11084334	chr3	0	TRUE
cg11092416	chr6	0.660396	TRUE
cg11117945	chr20	0.50893	TRUE
cg11136562	chr5	0.37959	TRUE
cg11177450	chr3	0.326346	TRUE
cg11205552	chr3	0.314853	TRUE
cg11220950	chr16	0.0807509	TRUE
cg11233384	chr1	0.407196	TRUE
cg11237115	chr3	0	TRUE
cg11271171	chr5	1	TRUE
cg11298786	chr1	0	TRUE
cg11299964	chr9	0.221894	TRUE
cg11314684	chr1	1	TRUE
cg11388238	chr2	0.637437	TRUE
cg11426590	chr1	0.0422185	TRUE
cg11459714	chr19	0	TRUE
cg11487705	chr5	0.170503	TRUE
cg11490446	chr14	0.404095	TRUE
cg11491284	chr3	1	TRUE
cg11529819	chr1	0.3672	TRUE
cg11600161	chr11	1	TRUE
cg11618577	chr2	0	TRUE
cg11620135	chr17	0.0659333	TRUE
cg11631518	chr12	0.34221	TRUE
cg11653233	chr17	0.578334	TRUE
cg11653266	chr17	0	TRUE
cg11671968	chr7	0.433473	TRUE
cg11705975	chr10	0	TRUE
cg11714320	chr12	0.226854	TRUE
cg11718162	chr1	0.204493	TRUE
cg11766468	chr19	1	TRUE
cg11789321	chr5	1	TRUE
cg11804928	chr17	0	TRUE
cg11807280	chr2	0.626744	TRUE
cg11830800	chr12	0.343837	TRUE
cg11832534	chr1	1	TRUE
cg11833861	chr17	0.124384	TRUE
cg11858226	chr7	0	TRUE
cg11896923	chr17	0.320517	TRUE
cg11903057	chr4	0.136422	TRUE
cg11932564	chr22	0.168775	TRUE
cg12068124	chr19	0.138757	TRUE
cg12082609	chr2	0.844319	TRUE
cg12105450	chr2	1	TRUE
cg12134570	chr19	0.108285	TRUE
cg12138483	chr19	0.766254	TRUE
cg12140144	chr1	0.677008	TRUE
cg12145907	chr5	0.211955	TRUE
cg12177001	chr14	0.905652	TRUE
cg12188560	chr9	0.522899	TRUE
cg12238343	chr5	0	TRUE
cg12247247	chr17	0	TRUE
cg12258344	chr2	0.758509	TRUE
cg12261786	chr10	0.0164044	TRUE
cg12265604	chr16	0	TRUE
cg12269343	chr14	0.601921	TRUE
cg12289045	chr19	0.738877	TRUE
cg12303084	chr20	0	TRUE
cg12324144	chr3	0.33883	TRUE
cg12328429	chr11	1	TRUE
cg12350474	chr17	0.744711	TRUE
cg12351433	chr2	0.444549	TRUE
cg12373771	chr22	0	TRUE
cg12379720	chr22	0	TRUE
cg12402251	chr8	0	TRUE
cg12413566	chr3	0.893995	TRUE
cg12419932	chr18	0.733001	TRUE
cg12424329	chr13	0.386904	TRUE
cg12459502	chr18	1	TRUE
cg12473775	chr11	0	TRUE
cg12477880	chr21	0.00433927	TRUE
cg12483947	chr10	0.834229	TRUE
cg12490835	chr10	0.0560806	TRUE
cg12506930	chr19	0.477745	TRUE
cg12530994	chr10	1	TRUE
cg12554573	chr3	0.0483844	TRUE
cg12578166	chr11	0	TRUE
cg12608692	chr5	1	TRUE
cg12616277	chr3	0	TRUE
cg12649038	chr10	1	TRUE
cg12743894	chr11	0.0846096	TRUE
cg12753631	chr6	0.964023	TRUE
cg12757011	chr2	0.426126	TRUE
cg12757684	chr6	0.779934	TRUE
cg12768605	chr19	0.353213	TRUE
cg12776156	chr11	0.852153	TRUE
cg12788037	chr17	0	TRUE
cg12813792	chr20	0.359774	TRUE
cg12830694	chr19	0.351877	TRUE
cg12864235	chr5	0.977537	TRUE
cg12869659	chr1	0.22711	TRUE
cg12883767	chr12	0.300514	TRUE
cg12899747	chr3	0.95653	TRUE
cg12934320	chr11	1	TRUE
cg12939283	chr6	1	TRUE
cg12941369	chr3	0.580948	TRUE
cg12946225	chr19	0	TRUE
cg12948621	chr19	0	TRUE
cg12968224	chr3	0.609288	TRUE
cg12985418	chr18	0.170426	TRUE
cg12991365	chr3	0.0285409	TRUE
cg13001142	chr6	0.196896	TRUE
cg13027206	chr14	1	TRUE
cg13029847	chr17	0.304081	TRUE
cg13033858	chr12	0.526892	TRUE
cg13038560	chr2	0.902331	TRUE
cg13042288	chr15	0.686211	TRUE
cg13093111	chr17	0.945257	TRUE
cg13119609	chr19	1	TRUE
cg13120519	chr19	0.140064	TRUE
cg13129046	chr10	0.592484	TRUE
cg13149736	chr2	0.196283	TRUE
cg13216057	chr11	0	TRUE
cg13218906	chr20	0	TRUE
cg13221458	chr6	0.516294	TRUE
cg13258700	chr7	0.653406	TRUE
cg13269407	chr22	0	TRUE
cg13278496	chr3	0.260158	TRUE
cg13296371	chr4	0.256823	TRUE
cg13302154	chr12	0.803692	TRUE
cg13307384	chr12	0	TRUE
cg13319175	chr1	0.803096	TRUE
cg13323474	chr10	0	TRUE
cg13351161	chr8	0.51843	TRUE
cg13388466	chr17	0.599637	TRUE
cg13406950	chr1	0	FALSE
cg13409216	chr10	0	TRUE
cg13409704	chr22	0.193737	TRUE
cg13449372	chr10	1	TRUE
cg13460409	chr21	0.209478	TRUE
cg13462622	chr9	0.515324	TRUE
cg13491731	chr14	0.98451	TRUE
cg13509147	chr19	1	TRUE
cg13510262	chr12	0	TRUE
cg13514050	chr20	0	TRUE
cg13547237	chr11	0.139409	TRUE
cg13550877	chr14	1	TRUE
cg13564075	chr17	0	TRUE
cg13567282	chr6	0.983438	TRUE
cg13571802	chr3	1	TRUE
cg13575542	chr3	0	TRUE
cg13586038	chr9	1	TRUE
cg13587552	chr1	0.60034	TRUE
cg13593287	chr14	0.547338	TRUE
cg13612317	chr10	0.196871	TRUE
cg13613532	chr11	0.0970855	TRUE
cg13615100	chr15	1	TRUE
cg13617776	chr19	0.464698	TRUE
cg13631913	chr1	0	TRUE
cg13649056	chr9	0	TRUE
cg13654195	chr6	0	TRUE
cg13656062	chr19	0.590629	TRUE
cg13656360	chr11	0.0442024	TRUE
cg13663218	chr12	0.0283242	TRUE
cg13674411	chr1	0.509045	TRUE
cg13682722	chr14	0.407493	TRUE
cg13683374	chr17	0.92669	TRUE
cg13700897	chr8	0.0406242	TRUE
cg13718960	chr14	1	TRUE
cg13734401	chr9	0.383489	TRUE
cg13739066	chr14	0.693825	TRUE
cg13767001	chr13	0.351535	TRUE
cg13783238	chr3	1	TRUE
cg13807496	chr11	0	TRUE
cg13824500	chr10	1	TRUE
cg13828047	chr15	0.583084	TRUE
cg13828440	chr12	1	TRUE
cg13836627	chr15	0.0328196	TRUE
cg13843773	chr4	0.482273	TRUE
cg13848598	chr10	0.305245	TRUE
cg13854874	chr21	0.207181	TRUE
cg13861644	chr12	0	TRUE
cg13870494	chr9	0.928124	TRUE
cg13870866	chr7	0	TRUE
cg13899108	chr19	0.191758	TRUE
cg13909661	chr12	0.767974	TRUE
cg13917614	chr17	0.694632	TRUE
cg13931228	chr7	0.124946	TRUE
cg13937040	chr15	0	TRUE
cg13975369	chr7	0.43763	TRUE
cg13994175	chr3	0.136101	TRUE
cg14009688	chr7	0.369864	TRUE
cg14010720	chr20	0.195879	TRUE
cg14059835	chr9	0.532657	TRUE
cg14060828	chr19	0.0259281	TRUE
cg14074174	chr19	0.367143	TRUE
cg14098795	chr17	0	TRUE
cg14105047	chr4	0	TRUE
cg14159818	chr20	0.0729369	TRUE
cg14162417	chr1	0.766057	TRUE
cg14163776	chr3	0.46948	TRUE
cg14175438	chr7	0.3329	TRUE
cg14209784	chr10	0	TRUE
cg14223995	chr4	0	TRUE
cg14224203	chr9	0	TRUE
cg14258236	chr6	1	TRUE
cg14281160	chr12	0.129189	TRUE
cg14308452	chr19	0.64827	TRUE
cg14314729	chr5	0.741213	TRUE
cg14329157	chr2	0.38176	TRUE
cg14334310	chr14	1	TRUE
cg14345676	chr5	0.58653	TRUE
cg14350002	chr9	0	TRUE
cg14359680	chr14	0.942397	TRUE
cg14361627	chr7	0	TRUE
cg14396995	chr7	0	TRUE
cg14408969	chr8	0.270171	TRUE
cg14409958	chr8	0.519718	TRUE
cg14411282	chr9	1	TRUE
cg14423778	chr3	0.75318	TRUE
cg14424579	chr2	0	TRUE
cg14456683	chr3	0.0141201	TRUE
cg14467840	chr1	0	TRUE
cg14473016	chr22	0.44437	TRUE
cg14501253	chr8	0	TRUE
cg14522800	chr17	0.0950438	TRUE
cg14550518	chr3	0.0526011	TRUE
cg14556683	chr19	0.106513	TRUE
cg14565725	chr1	0.708356	TRUE
cg14597908	chr20	0.47645	TRUE
cg14614643	chr1	1	TRUE
cg14654875	chr16	0.801854	TRUE
cg14658362	chr8	0	TRUE
cg14676592	chr16	0.628834	TRUE
cg14689355	chr2	0	TRUE
cg14692377	chr17	0	TRUE
cg14699004	chr4	0	TRUE
cg14723032	chr17	0.514336	TRUE
cg14727952	chr11	0	TRUE
cg14746276	chr5	0.245607	TRUE
cg14747225	chr16	0.330704	TRUE
cg14748856	chr5	1	TRUE
cg14753631	chr12	0.62626	TRUE
cg14754581	chr3	0.237963	TRUE
cg14757228	chr6	0.287017	TRUE
cg14776578	chr10	0.232848	TRUE
cg14847502	chr10	0.114807	TRUE
cg14894144	chr18	0.317549	TRUE
cg14911690	chr19	0	TRUE
cg14916213	chr11	0.0485154	TRUE
cg14918082	chr17	0.794627	TRUE
cg14962509	chr1	0	TRUE
cg14972143	chr4	0.0394613	TRUE
cg14992253	chr1	0.149807	TRUE
cg15013019	chr19	0.108285	TRUE
cg15015340	chr11	0.113595	TRUE
cg15059474	chr7	1	TRUE
cg15089077	chr1	0.331091	TRUE
cg15110296	chr12	0.212215	TRUE
cg15149655	chr2	0	TRUE
cg15171237	chr4	0.213159	TRUE
cg15185286	chr6	0	TRUE
cg15188939	chr15	0.908906	TRUE
cg15195412	chr16	0.232905	TRUE
cg15201877	chr1	0.0249638	TRUE
cg15220605	chr17	0.913788	TRUE
cg15262928	chr1	0	TRUE
cg15277914	chr3	0.685216	TRUE
cg15297650	chr2	0.486892	TRUE
cg15338967	chr13	1	TRUE
cg15339075	chr6	1	TRUE
cg15341340	chr19	0	TRUE
cg15344028	chr2	1	TRUE
cg15379633	chr22	0.0506687	TRUE
cg15381313	chr12	1	TRUE
cg15381769	chr6	0	TRUE
cg15393490	chr1	0.625627	TRUE
cg15405572	chr12	1	TRUE
cg15427448	chr11	0	TRUE
cg15447479	chr7	0	TRUE
cg15480367	chr14	0	TRUE
cg15489301	chr7	0.572792	TRUE
cg15498283	chr11	0	TRUE
cg15519474	chr17	0.443302	TRUE
cg15538427	chr11	0.729257	TRUE
cg15547534	chr7	0.0785784	TRUE
cg15551881	chr9	0.766632	TRUE
cg15553770	chr11	1	TRUE
cg15569512	chr14	0	TRUE
cg15603896	chr7	0.740372	TRUE
cg15611364	chr3	0.0742866	TRUE
cg15642326	chr19	0.228903	TRUE
cg15648389	chr12	0.742311	TRUE
cg15661409	chr14	0.867662	TRUE
cg15673540	chr17	0.406206	TRUE
cg15703512	chr16	0.505483	TRUE
cg15774391	chr17	0	TRUE
cg15804973	chr6	0.053668	TRUE
cg15811427	chr19	1	TRUE
cg15845821	chr19	0.438871	TRUE
cg15856055	chr10	0.52942	TRUE
cg15881088	chr3	0	TRUE
cg15887846	chr11	0.145862	TRUE
cg15900052	chr1	1	TRUE
cg15903032	chr10	0	TRUE
cg15903282	chr3	0.693163	TRUE
cg15910502	chr3	0.227559	TRUE
cg15936446	chr5	0	TRUE
cg15963417	chr12	0.169525	TRUE
cg15966757	chr12	0.374663	TRUE
cg15974053	chr19	0	TRUE
cg15988232	chr3	0.847895	TRUE
cg16008966	chr1	1	TRUE
cg16012294	chr7	1	TRUE
cg16032108	chr11	1	TRUE
cg16034652	chr14	0	TRUE
cg16054275	chr1	0.559033	TRUE
cg16085042	chr12	0	TRUE
cg16150435	chr6	0.86004	TRUE
cg16168311	chr1	0	TRUE
cg16173067	chr20	1	TRUE
cg16181396	chr3	0.0200241	TRUE
cg16241714	chr8	0	TRUE
cg16243756	chr8	0.105659	TRUE
cg16255583	chr6	1	TRUE
cg16281600	chr5	0.591467	TRUE
cg16295988	chr9	0.258327	TRUE
cg16313343	chr14	0.254921	TRUE
cg16314254	chr1	1	TRUE
cg16319578	chr14	0.035243	TRUE
cg16333846	chr6	0.899031	TRUE
cg16340918	chr10	0	TRUE
cg16352283	chr1	0.19193	TRUE
cg16354207	chr2	0.106964	TRUE
cg16357381	chr3	0.211727	TRUE
cg16358826	chr4	0.669668	TRUE
cg16363586	chr19	0.352281	TRUE
cg16372520	chr14	0.648544	TRUE
cg16374999	chr12	0.302929	TRUE
cg16386080	chr9	0	TRUE
cg16408394	chr9	0	TRUE
cg16408970	chr10	0.794175	TRUE
cg16419235	chr8	0	TRUE
cg16419345	chr17	0.188747	TRUE
cg16466334	chr11	1	TRUE
cg16477091	chr17	0.625091	TRUE
cg16494477	chr5	0	TRUE
cg16514113	chr16	0.906319	TRUE
cg16543027	chr15	0.985441	TRUE
cg16547529	chr11	0.849434	TRUE
cg16579101	chr12	0	TRUE
cg16584662	chr15	1	TRUE
cg16599143	chr1	0.371465	TRUE
cg16608498	chr5	0.857572	TRUE
cg16612562	chr22	0.314336	TRUE
cg16618104	chr12	0.0938474	TRUE
cg16618789	chr7	1	TRUE
cg16648841	chr1	0.884997	TRUE
cg16703882	chr3	0	TRUE
cg16713727	chr1	0.435886	TRUE
cg16717122	chr15	0.337562	TRUE
cg16718891	chr12	0.163512	TRUE
cg16728114	chr1	0.135177	TRUE
cg16743289	chr1	0.0971424	TRUE
cg16744741	chr4	1	TRUE
cg16816226	chr3	0.352971	TRUE
cg16852756	chr7	1	TRUE
cg16854606	chr19	0.890586	TRUE
cg16867657	chr6	0.00433927	TRUE
cg16899442	chr16	0	TRUE
cg16933388	chr3	0.618891	TRUE
cg16983159	chr5	0.455335	TRUE
cg16984944	chr3	0	TRUE
cg17009433	chr9	0	TRUE
cg17038116	chr1	0	TRUE
cg17063929	chr11	0.245592	TRUE
cg17099569	chr2	0.412047	TRUE
cg17110586	chr19	0.799279	TRUE
cg17129388	chr17	0.534819	TRUE
cg17133388	chr3	0	TRUE
cg17163168	chr1	0.101146	TRUE
cg17168836	chr1	0.859922	TRUE
cg17183905	chr12	0.335129	TRUE
cg17243289	chr18	0.279014	TRUE
cg17254383	chr17	0.595563	TRUE
cg17266282	chr6	0.507416	TRUE
cg17274064	chr21	0.168899	TRUE
cg17285325	chr22	0.138493	TRUE
cg17321954	chr3	0.0538667	TRUE
cg17324128	chr10	0.211024	TRUE
cg17338403	chr15	0.290243	TRUE
cg17338821	chr3	0	TRUE
cg17408647	chr7	0	TRUE
cg17421623	chr3	0.272953	TRUE
cg17431739	chr10	0.259878	TRUE
cg17471102	chr19	0.837855	TRUE
cg17472796	chr11	1	TRUE
cg17526300	chr10	0	TRUE
cg17536848	chr7	0.078049	TRUE
cg17589341	chr18	0.0862717	TRUE
cg17605084	chr12	1	TRUE
cg17607231	chr2	1	TRUE
cg17616646	chr11	0	TRUE
cg17621438	chr5	0.108019	TRUE
cg17627559	chr11	0	TRUE
cg17641104	chr12	0	TRUE
cg17655614	chr16	0.452378	TRUE
cg17686885	chr17	0	TRUE
cg17726022	chr12	0	TRUE
cg17729667	chr20	0.0675595	TRUE
cg17749443	chr9	0.0560421	TRUE
cg17769442	chr19	0	TRUE
cg17770886	chr10	0.408233	TRUE
cg17782713	chr10	0.208808	TRUE
cg17791651	chr1	0.179898	TRUE
cg17853587	chr4	0.315148	TRUE
cg17861230	chr19	0.0634606	TRUE
cg17879376	chr1	0.480988	TRUE
cg17882660	chr13	0	TRUE
cg17896249	chr16	0.440031	TRUE
cg17903544	chr12	0.157812	TRUE
cg17923358	chr7	0	TRUE
cg17940013	chr1	0	TRUE
cg17953385	chr10	0.75228	TRUE
cg17960516	chr4	0.124264	TRUE
cg17966192	chr2	0.920949	TRUE
cg18001427	chr21	0.328558	TRUE
cg18003795	chr22	1	TRUE
cg18031008	chr1	0	TRUE
cg18055007	chr6	0.239251	TRUE
cg18064714	chr7	0.059162	TRUE
cg18117393	chr1	1	TRUE
cg18125510	chr14	0.624793	TRUE
cg18139769	chr7	0.520397	TRUE
cg18180783	chr10	0.672609	TRUE
cg18182399	chr2	0	TRUE
cg18240463	chr1	1	TRUE
cg18241647	chr20	1	TRUE
cg18244483	chr4	0.99247	TRUE
cg18267374	chr8	0	TRUE
cg18281842	chr11	0.685852	TRUE
cg18303397	chr3	0	TRUE
cg18310639	chr1	0.863845	TRUE
cg18328933	chr3	0	TRUE
cg18335931	chr19	0.0718509	TRUE
cg18343474	chr1	0	TRUE
cg18384097	chr1	0.975094	TRUE
cg18392482	chr12	1	TRUE
cg18440048	chr22	0	TRUE
cg18442362	chr7	0.581846	TRUE
cg18448426	chr22	1	TRUE
cg18450254	chr3	0.655415	TRUE
cg18457597	chr17	1	TRUE
cg18468088	chr6	0.100527	TRUE
cg18468844	chr1	0.904302	TRUE
cg18473521	chr12	0.216017	TRUE
cg18501647	chr6	0.783424	TRUE
cg18537454	chr10	0.240396	TRUE
cg18573383	chr12	0.27825	TRUE
cg18582260	chr13	0.400462	TRUE
cg18587364	chr19	0	TRUE
cg18633600	chr12	0	TRUE
cg18660898	chr1	0.041639	TRUE
cg18691434	chr7	0	TRUE
cg18693704	chr16	0.441415	TRUE
cg18732541	chr19	0.333439	TRUE
cg18738190	chr10	0	TRUE
cg18769120	chr7	0.974812	TRUE
cg18771300	chr14	0.223986	TRUE
cg18809289	chr10	0.0514141	TRUE
cg18826352	chr20	1	TRUE
cg18875012	chr3	0.28237	TRUE
cg18881501	chr17	0	TRUE
cg18917643	chr5	0.764957	TRUE
cg18933331	chr1	0.322047	TRUE
cg18956095	chr8	0	TRUE
cg18983672	chr1	0.62352	TRUE
cg18984151	chr3	0.31489	TRUE
cg18996776	chr3	0.078036	TRUE
cg19008809	chr3	0	TRUE
cg19015086	chr22	1	TRUE
cg19028160	chr2	0	TRUE
cg19031565	chr17	0.518369	TRUE
cg19034084	chr5	0.468755	TRUE
cg19044674	chr1	0	TRUE
cg19046959	chr1	0.13	TRUE
cg19104072	chr11	0	TRUE
cg19149785	chr19	0.586928	TRUE
cg19166302	chr3	0.224007	TRUE
cg19167673	chr22	0	TRUE
cg19203457	chr6	0.960199	TRUE
cg19269039	chr1	1	TRUE
cg19273182	chr2	0	TRUE
cg19283806	chr18	1	TRUE
cg19287114	chr9	0.0151747	TRUE
cg19297232	chr16	0.511204	TRUE
cg19305227	chr15	1	TRUE
cg19343530	chr6	0.39966	TRUE
cg19345165	chr11	0	TRUE
cg19346193	chr10	0.58403	TRUE
cg19356189	chr19	0.508601	TRUE
cg19371795	chr19	0.113475	TRUE
cg19378133	chr16	0.115806	TRUE
cg19381811	chr3	0.241386	TRUE
cg19398783	chr4	1	TRUE
cg19420968	chr1	0.956389	TRUE
cg19439331	chr10	0	TRUE
cg19478743	chr17	0	TRUE
cg19497517	chr8	0.746227	TRUE
cg19505546	chr5	0.0323944	TRUE
cg19514469	chr16	0.122061	TRUE
cg19514928	chr1	0.528705	TRUE
cg19556572	chr9	0.565247	TRUE
cg19560210	chr1	0.396737	TRUE
cg19566405	chr17	0.127893	TRUE
cg19569684	chr5	0.912831	TRUE
cg19573166	chr14	0.215871	TRUE
cg19583819	chr5	0.636768	TRUE
cg19586576	chr17	0.00391583	TRUE
cg19596273	chr10	0.114807	TRUE
cg19615059	chr12	0.0483844	TRUE
cg19632206	chr1	0	TRUE
cg19662687	chr1	0.803561	TRUE
cg19663246	chr7	0.798693	TRUE
cg19663795	chr16	0.799694	TRUE
cg19685066	chr1	0.569662	TRUE
cg19686152	chr15	0.285787	TRUE
cg19692710	chr11	1	TRUE
cg19702785	chr20	0.208102	TRUE
cg19706682	chr16	0.206789	TRUE
cg19722847	chr12	0.275615	TRUE
cg19724470	chr9	0.205952	TRUE
cg19731122	chr17	0.70191	TRUE
cg19761273	chr17	0.429248	TRUE
cg19789753	chr2	0	TRUE
cg19853760	chr22	0.0441517	TRUE
cg19859445	chr8	1	TRUE
cg19883905	chr18	0.0517271	TRUE
cg19935065	chr10	1	TRUE
cg19945840	chr1	0	TRUE
cg20050761	chr7	0.873691	TRUE
cg20052760	chr6	1	TRUE
cg20063906	chr11	0.385897	TRUE
cg20066677	chr12	0.19188	TRUE
cg20090497	chr12	1	TRUE
cg20100381	chr16	0.330413	TRUE
cg20102280	chr13	0.0908283	TRUE
cg20149168	chr1	0.9069	TRUE
cg20162159	chr3	0	TRUE
cg20173259	chr19	0	TRUE
cg20234170	chr11	0.314266	TRUE
cg20240860	chr11	0.364942	TRUE
cg20264732	chr16	0	TRUE
cg20283670	chr10	0.662322	TRUE
cg20295671	chr22	0	TRUE
cg20305610	chr4	0.0968527	TRUE
cg20322193	chr7	0.747894	TRUE
cg20324262	chr19	0.169094	TRUE
cg20366832	chr17	0.517485	TRUE
cg20397034	chr7	0.0185519	TRUE
cg20404336	chr12	0.560546	TRUE
cg20420249	chr1	1	TRUE
cg20426994	chr7	0.0721824	TRUE
cg20492933	chr5	0.178082	TRUE
cg20492951	chr11	0	TRUE
cg20515136	chr3	0	TRUE
cg20524216	chr3	0	TRUE
cg20525917	chr20	0.232041	TRUE
cg20540209	chr15	0	TRUE
cg20550118	chr15	0	TRUE
cg20570279	chr11	0.583881	TRUE
cg20572838	chr17	0.091569	TRUE
cg20592391	chr15	0.724832	TRUE
cg20652640	chr16	0	TRUE
cg20654468	chr11	0.283929	TRUE
cg20665157	chr7	1	TRUE
cg20669012	chr3	0.184238	TRUE
cg20674577	chr20	0.0196024	TRUE
cg20692569	chr7	0	TRUE
cg20704560	chr1	0.198083	TRUE
cg20755989	chr5	1	TRUE
cg20756600	chr21	0.663681	TRUE
cg20761322	chr15	0.0675723	TRUE
cg20795863	chr2	0.444524	TRUE
cg20822990	chr1	0.0162361	TRUE
cg20828084	chr15	0.191135	TRUE
cg20847090	chr1	1	TRUE
cg20891917	chr7	1	TRUE
cg20897936	chr6	0.414873	TRUE
cg20914508	chr3	0.331583	TRUE
cg20947775	chr4	0	TRUE
cg20960181	chr1	0.488759	TRUE
cg20964423	chr1	0.774693	TRUE
cg20967028	chr12	1	TRUE
cg20988565	chr8	0.739836	TRUE
cg20999813	chr16	0	TRUE
cg21006686	chr12	0.180866	TRUE
cg21053529	chr15	0	TRUE
cg21072934	chr15	0	TRUE
cg21081971	chr13	0.2606	TRUE
cg21096399	chr11	0.427551	TRUE
cg21099326	chr8	0	TRUE
cg21116457	chr18	0.0862717	TRUE
cg21120249	chr9	0.339751	TRUE
cg21137706	chr12	0.44912	TRUE
cg21139312	chr17	0.730751	TRUE
cg21144928	chr1	0.0626065	TRUE
cg21159778	chr9	0	TRUE
cg21184495	chr17	0	TRUE
cg21184711	chr7	1	TRUE
cg21186299	chr7	0	TRUE
cg21200703	chr4	0.389543	TRUE
cg21201109	chr19	0.396509	TRUE
cg21205978	chr22	0.457429	TRUE
cg21207418	chr19	0.462265	TRUE
cg21211748	chr1	0.169009	TRUE
cg21251970	chr9	1	TRUE
cg21254939	chr4	1	TRUE
cg21296230	chr15	0	TRUE
cg21305265	chr8	0	TRUE
cg21363706	chr8	1	TRUE
cg21370143	chr11	1	TRUE
cg21378206	chr2	1	TRUE
cg21395782	chr19	0.140252	TRUE
cg21448423	chr1	0.212645	TRUE
cg21460081	chr17	0.0559225	TRUE
cg21467614	chr6	1	TRUE
cg21515349	chr17	0	TRUE
cg21515406	chr5	0.42908	TRUE
cg21563471	chr2	0.869721	TRUE
cg21567504	chr15	0.0340683	TRUE
cg21572722	chr6	0.100446	TRUE
cg21631428	chr4	0.77325	TRUE
cg21649520	chr8	0.979791	TRUE
cg21674704	chr8	0.26838	TRUE
cg21712685	chr6	0.171707	TRUE
cg21743182	chr7	1	TRUE
cg21747310	chr12	1	TRUE
cg21762589	chr10	0.730089	TRUE
cg21788470	chr12	0	FALSE
cg21801378	chr15	0	TRUE
cg21809447	chr1	0.46385	TRUE
cg21815258	chr5	1	TRUE
cg21835643	chr20	0.45272	TRUE
cg21860825	chr12	1	TRUE
cg21867345	chr3	0.431522	TRUE
cg21870884	chr1	0	TRUE
cg21874213	chr5	0.0191993	TRUE
cg21878650	chr5	1	TRUE
cg21899500	chr3	0	TRUE
cg21907579	chr12	1	TRUE
cg21911021	chr19	0	TRUE
cg21926612	chr6	0.608949	TRUE
cg21940708	chr19	1	TRUE
cg21944491	chr19	0	TRUE
cg21949781	chr18	0	TRUE
cg21950518	chr5	0	TRUE
cg21992250	chr11	0.101837	TRUE
cg21993406	chr5	0.166868	TRUE
cg22006386	chr19	0	TRUE
cg22016779	chr2	0.620811	TRUE
cg22061831	chr2	0.0603042	TRUE
cg22073802	chr9	0	TRUE
cg22090592	chr14	0.415668	TRUE
cg22112832	chr2	0.267559	TRUE
cg22156456	chr17	0.731472	TRUE
cg22158769	chr2	0	TRUE
cg22162281	chr2	0.0185272	TRUE
cg22171829	chr7	0.107519	TRUE
cg22179082	chr13	0.162162	TRUE
cg22185977	chr5	1	TRUE
cg22190114	chr19	0.850888	TRUE
cg22194129	chr12	0.383653	TRUE
cg22197050	chr2	0.0366584	TRUE
cg22197830	chr5	0.166938	TRUE
cg22213242	chr11	0.439581	TRUE
cg22264409	chr3	1	TRUE
cg22281505	chr17	0.503317	TRUE
cg22282410	chr7	0	TRUE
cg22282672	chr5	1	TRUE
cg22285878	chr7	0	TRUE
cg22289837	chr8	1	TRUE
cg22296808	chr11	1	TRUE
cg22352234	chr6	1	TRUE
cg22358580	chr12	0.33481	TRUE
cg22372849	chr7	0.580178	TRUE
cg22378065	chr6	1	TRUE
cg22395019	chr2	0.150792	TRUE
cg22396353	chr22	0	TRUE
cg22407458	chr6	0.254158	TRUE
cg22432269	chr15	0	TRUE
cg22449114	chr20	0.1557	TRUE
cg22452230	chr15	0.135415	TRUE
cg22454769	chr2	0.186735	TRUE
cg22473095	chr20	0.331224	TRUE
cg22484793	chr3	0.942232	TRUE
cg22495124	chr17	0.962796	TRUE
cg22507023	chr17	0.292832	TRUE
cg22511262	chr11	0.000323323	TRUE
cg22512531	chr11	1	TRUE
cg22512670	chr1	0.624441	TRUE
cg22517995	chr19	0.295767	TRUE
cg22568540	chr19	0.638786	TRUE
cg22580353	chr19	0.568856	TRUE
cg22580512	chr12	0	TRUE
cg22582569	chr11	0.242688	TRUE
cg22594309	chr1	0	TRUE
cg22613010	chr3	0.11937	TRUE
cg22637507	chr11	0	TRUE
cg22679120	chr7	0.106545	TRUE
cg22682373	chr12	0.00216964	TRUE
cg22708738	chr19	0.0777041	TRUE
cg22736354	chr6	0.00681045	TRUE
cg22793142	chr1	0.807408	TRUE
cg22796704	chr10	0	TRUE
cg22809047	chr2	0.538416	TRUE
cg22827210	chr12	0.876836	TRUE
cg22843803	chr11	0	TRUE
cg22851420	chr1	0	TRUE
cg22864500	chr2	1	TRUE
cg22881141	chr22	0.712513	TRUE
cg22901840	chr1	0.994093	TRUE
cg22919728	chr3	0.266578	TRUE
cg22920873	chr7	0	TRUE
cg22943590	chr2	1	TRUE
cg22947000	chr16	0.756252	TRUE
cg22971191	chr13	1	TRUE
cg22982767	chr22	0.041521	TRUE
cg22983092	chr17	0.543727	TRUE
cg22991148	chr21	0.128756	TRUE
cg23008153	chr5	0.0653788	TRUE
cg23028740	chr1	1	TRUE
cg23045908	chr1	0.0073748	TRUE
cg23077820	chr2	0	TRUE
cg23078123	chr1	0.829597	TRUE
cg23091758	chr11	0	TRUE
cg23092072	chr4	0.0885384	TRUE
cg23097079	chr10	0.940167	TRUE
cg23124451	chr22	0.0973027	TRUE
cg23127998	chr20	0.481527	TRUE
cg23152772	chr9	0.258757	TRUE
cg23159337	chr3	1	TRUE
cg23159704	chr20	1	TRUE
cg23173910	chr2	1	TRUE
cg23174607	chr6	0.0625741	TRUE
cg23180365	chr3	0	TRUE
cg23191950	chr15	0.680927	TRUE
cg23213217	chr1	0.386746	TRUE
cg23234999	chr15	1	TRUE
cg23239039	chr4	0	TRUE
cg23239150	chr4	0.857965	TRUE
cg23320649	chr3	0.558162	TRUE
cg23338195	chr8	1	TRUE
cg23357533	chr13	0.562344	TRUE
cg23357854	chr16	0.329351	TRUE
cg23361092	chr13	0	TRUE
cg23373640	chr14	0	FALSE
cg23375552	chr6	0	TRUE
cg23376526	chr1	0	TRUE
cg23389651	chr13	0.910602	TRUE
cg23398076	chr2	0.98765	TRUE
cg23460961	chr11	0.721892	TRUE
cg23462687	chr2	0.065467	TRUE
cg23500537	chr5	0.67965	TRUE
cg23510258	chr17	1	TRUE
cg23510764	chr5	1	TRUE
cg23517605	chr6	0	TRUE
cg23538901	chr15	0.830101	TRUE
cg23552977	chr14	0	TRUE
cg23568913	chr22	0.113307	TRUE
cg23586440	chr20	0.708577	TRUE
cg23605843	chr1	0	TRUE
cg23606718	chr2	0	TRUE
cg23615741	chr10	0.0494291	TRUE
cg23643435	chr2	0	TRUE
cg23662675	chr20	0	TRUE
cg23668631	chr17	0.318803	TRUE
cg23679724	chr20	0.0664903	TRUE
cg23709172	chr14	0.131065	TRUE
cg23710218	chr8	0	TRUE
cg23712970	chr14	0.242163	TRUE
cg23718736	chr18	0.393775	TRUE
cg23731991	chr7	0.155315	TRUE
cg23744638	chr11	1	TRUE
cg23753748	chr10	0.656982	TRUE
cg23754392	chr10	0.208808	TRUE
cg23786576	chr1	0.20299	TRUE
cg23808301	chr17	0	TRUE
cg23818978	chr11	0.565917	TRUE
cg23829395	chr12	0.963724	TRUE
cg23832061	chr6	0	TRUE
cg23836737	chr4	0.665463	TRUE
cg23857078	chr7	0.953815	TRUE
cg23858532	chr4	0	TRUE
cg23889772	chr19	0.445823	TRUE
cg23900712	chr15	0.354812	TRUE
cg23941599	chr5	0.404317	TRUE
cg23995914	chr4	0	TRUE
cg24046474	chr9	0.462605	TRUE
cg24058132	chr14	0.394503	TRUE
cg24079702	chr2	0.186735	TRUE
cg24081819	chr8	0.34086	TRUE
cg24090911	chr5	0.0996792	TRUE
cg24091819	chr12	0.966193	TRUE
cg24107728	chr1	0.709877	TRUE
cg24110063	chr16	0.190887	TRUE
cg24116886	chr20	0.935167	TRUE
cg24125648	chr15	0.376716	TRUE
cg24126851	chr11	0.47394	TRUE
cg24150153	chr1	0	TRUE
cg24169822	chr7	0.669969	TRUE
cg24173182	chr17	0.832603	TRUE
cg24178740	chr2	0	TRUE
cg24208206	chr3	0.25362	TRUE
cg24217948	chr18	0	TRUE
cg24254120	chr13	0.148	TRUE
cg24262469	chr3	0.675385	TRUE
cg24304712	chr1	0	TRUE
cg24332433	chr17	0	TRUE
cg24349631	chr22	0	TRUE
cg24350475	chr10	0.439379	TRUE
cg24374161	chr11	1	TRUE
cg24375409	chr1	0.164102	TRUE
cg24403644	chr20	1	TRUE
cg24407308	chr11	0.115687	TRUE
cg24441922	chr2	0.658648	TRUE
cg24450312	chr1	0	TRUE
cg24471894	chr9	1	TRUE
cg24493940	chr12	0	TRUE
cg24505122	chr12	0.754901	TRUE
cg24505341	chr3	0	TRUE
cg24550456	chr1	0.396489	TRUE
cg24556026	chr9	0.453398	TRUE
cg24580001	chr11	0.71073	TRUE
cg24611351	chr2	0.434871	TRUE
cg24620508	chr21	0.54977	TRUE
cg24651706	chr2	0.0201668	TRUE
cg24674703	chr11	0.898073	TRUE
cg24696028	chr19	0	TRUE
cg24711649	chr12	0.483646	TRUE
cg24713204	chr19	0	TRUE
cg24739596	chr1	0.731538	TRUE
cg24745327	chr11	0.00247031	TRUE
cg24768561	chr2	0.294766	TRUE
cg24788483	chr10	0.843393	TRUE
cg24834740	chr20	0	TRUE
cg24838825	chr10	1	TRUE
cg24843443	chr4	0.492248	TRUE
cg24845578	chr5	0	TRUE
cg24862131	chr7	1	TRUE
cg24881205	chr7	0	TRUE
cg24883498	chr19	0	TRUE
cg24888049	chr15	0	TRUE
cg24888989	chr3	0	TRUE
cg24891133	chr13	0.434616	TRUE
cg24899750	chr20	0.523951	TRUE
cg24921089	chr11	0.569595	TRUE
cg24987259	chr11	0.128981	TRUE
cg24996883	chr1	0.625289	TRUE
cg25005357	chr15	1	TRUE
cg25022327	chr11	1	TRUE
cg25062539	chr8	0.706717	TRUE
cg25070637	chr8	0	TRUE
cg25092328	chr20	0.150634	TRUE
cg25101936	chr11	0.632138	TRUE
cg25135555	chr17	0.209115	TRUE
cg25136687	chr6	0	TRUE
cg25148589	chr4	0.0586636	TRUE
cg25149218	chr2	0.928096	TRUE
cg25159610	chr5	0.950833	TRUE
cg25166896	chr22	0.0627279	TRUE
cg25178749	chr21	0.759518	TRUE
cg25229964	chr1	0.660112	TRUE
cg25251635	chr7	0.0459736	TRUE
cg25256723	chr1	0.544523	TRUE
cg25268718	chr14	0.130893	TRUE
cg25305703	chr8	1	TRUE
cg25309888	chr2	0.673532	TRUE
cg25386151	chr1	0.0891135	TRUE
cg25410668	chr1	0.833281	TRUE
cg25411725	chr3	1	TRUE
cg25415508	chr15	0	TRUE
cg25427880	chr10	0	TRUE
cg25428451	chr1	0.235641	TRUE
cg25428494	chr4	0.93375	TRUE
cg25431974	chr2	0.391235	TRUE
cg25436157	chr18	0.711388	TRUE
cg25450819	chr5	1	TRUE
cg25459323	chr22	0.0522533	TRUE
cg25478614	chr3	0.147354	TRUE
cg25505610	chr11	0.405795	TRUE
cg25536676	chr1	0.163294	TRUE
cg25538571	chr8	0.972712	TRUE
cg25552492	chr8	0.00357731	TRUE
cg25564800	chr3	0.441398	TRUE
cg25618424	chr1	0.749347	TRUE
cg25657834	chr2	0.363611	TRUE
cg25683012	chr12	0.061008	TRUE
cg25713185	chr2	0.121024	TRUE
cg25719851	chr12	0.162706	TRUE
cg25762706	chr8	0.611744	TRUE
cg25769980	chr4	1	TRUE
cg25771195	chr16	0	TRUE
cg25781123	chr3	0.711482	TRUE
cg25809905	chr17	1	TRUE
cg25838150	chr11	1	TRUE
cg25881193	chr6	0.312071	TRUE
cg25898500	chr16	0	TRUE
cg25909396	chr17	0.29505	TRUE
cg25928579	chr17	0.0676577	TRUE
cg25936902	chr13	0.114761	TRUE
cg25947945	chr1	0.535174	TRUE
cg25969122	chr11	0.66062	TRUE
cg26003813	chr16	0	TRUE
cg26005082	chr19	0.235784	TRUE
cg26022315	chr17	0	TRUE
cg26043391	chr1	0	TRUE
cg26045434	chr8	0	TRUE
cg26091688	chr16	0.00484245	TRUE
cg26096837	chr11	0.231396	TRUE
cg26101086	chr8	1	TRUE
cg26104204	chr19	0	TRUE
cg26105310	chr1	0.392827	TRUE
cg26109803	chr10	1	TRUE
cg26116103	chr12	0	TRUE
cg26147845	chr12	0.0954245	TRUE
cg26158023	chr3	1	TRUE
cg26162695	chr17	0	TRUE
cg26201213	chr10	0.0506071	TRUE
cg26212924	chr8	0	TRUE
cg26219051	chr22	0	TRUE
cg26297688	chr12	0	TRUE
cg26311454	chr12	0.675623	TRUE
cg26312920	chr7	0.834798	TRUE
cg26350286	chr8	0	TRUE
cg26357744	chr3	0.269763	TRUE
cg26372517	chr1	0	TRUE
cg26382071	chr17	0	TRUE
cg26394737	chr14	0.283487	TRUE
cg26394940	chr22	0.0771663	TRUE
cg26453588	chr22	0.0238664	TRUE
cg26456957	chr19	0.124968	TRUE
cg26469387	chr15	0.679216	TRUE
cg26483332	chr10	0.088846	TRUE
cg26535072	chr9	0.322292	TRUE
cg26552743	chr11	0.294085	TRUE
cg26581729	chr9	0.144324	TRUE
cg26610808	chr10	0.6052	TRUE
cg26614073	chr3	0.640992	TRUE
cg26620959	chr6	0.100663	TRUE
cg26650655	chr5	0	TRUE
cg26665419	chr6	0	TRUE
cg26668490	chr17	0.0342998	TRUE
cg26685941	chr13	0.284019	TRUE
cg26711820	chr12	0.467326	TRUE
cg26718511	chr6	0	TRUE
cg26723847	chr11	0.0665585	TRUE
cg26725786	chr8	0.926409	TRUE
cg26746469	chr20	0.387986	TRUE
cg26765385	chr7	1	TRUE
cg26815229	chr1	0.6302	TRUE
cg26824091	chr6	0.371546	TRUE
cg26824216	chr3	0.403306	TRUE
cg26833936	chr1	0.816092	TRUE
cg26842024	chr19	0.153004	TRUE
cg26843711	chr5	0.041983	TRUE
cg26845300	chr6	0	TRUE
cg26866325	chr4	1	TRUE
cg26898166	chr2	0	TRUE
cg26921969	chr5	0.180292	TRUE
cg26925981	chr8	0.740059	TRUE
cg26927807	chr19	0.248259	TRUE
cg26932976	chr17	0.161285	TRUE
cg26933021	chr1	0.940289	TRUE
cg26974444	chr16	0.891734	TRUE
cg26986871	chr12	0.577813	TRUE
cg27009703	chr7	0	TRUE
cg27015931	chr16	0.411112	TRUE
cg27016307	chr19	0.44826	TRUE
cg27021512	chr13	0.386904	TRUE
cg27059819	chr3	0.762485	TRUE
cg27061971	chr5	0	TRUE
cg27092035	chr5	0	TRUE
cg27131176	chr22	0	TRUE
cg27168858	chr1	0.569607	TRUE
cg27169020	chr15	0.663554	TRUE
cg27187881	chr22	0	TRUE
cg27202708	chr1	0.373816	TRUE
cg27212234	chr19	0.143888	TRUE
cg27244482	chr5	1	TRUE
cg27319898	chr7	0	TRUE
cg27320127	chr2	0	TRUE
cg27338353	chr22	0	TRUE
cg27367526	chr7	0.360847	TRUE
cg27367952	chr2	0.466213	TRUE
cg27377450	chr19	0.526887	TRUE
cg27386529	chr3	0.590936	TRUE
cg27396655	chr22	0	TRUE
cg27413543	chr4	0	TRUE
cg27430293	chr16	0.286127	TRUE
cg27432653	chr1	0	TRUE
cg27437510	chr7	0.842977	TRUE
cg27440834	chr3	1	TRUE
cg27447740	chr20	0.0717378	TRUE
cg27455578	chr7	0.331492	TRUE
cg27493997	chr1	0	TRUE
cg27494383	chr15	0	TRUE
cg27508620	chr7	0.206588	TRUE
cg27514224	chr9	0.861849	TRUE
cg27544190	chr21	0	TRUE
cg27553955	chr2	0	TRUE
cg27597505	chr12	0.632672	TRUE
cg27619353	chr22	0.0441517	TRUE
cg27626102	chr7	0.174587	TRUE
cg27640528	chr5	0.839936	TRUE
cg27655905	chr11	0.0213596	TRUE
ch.13.39564907R	chr13	0	FALSE
ch.2.30415474F	chr2	0	FALSE

## Sheet: Denisovan (Original Clocks)
Table S6: Methylation values of target sites extracted from archaic hominin DNAm maps
Site	Chromosome	Beta Value	Matched
cg00017842	chr2	1	TRUE
cg00059225	chr5	0	FALSE
cg00073460	chr6	0.760455	TRUE
cg00075967	chr15	0.375845	TRUE
cg00079056	chr9	1	TRUE
cg00083937	chr22	0.433138	TRUE
cg00085493	chr1	0.785632	TRUE
cg00091693	chr17	0.565092	TRUE
cg00095976	chr6	0.123217	TRUE
cg00096065	chr5	0.545546	TRUE
cg00113951	chr12	0.0790515	TRUE
cg00168942	chr10	1	TRUE
cg00194146	chr6	0	TRUE
cg00230271	chr4	0	TRUE
cg00241664	chr16	1	TRUE
cg00257455	chr1	0.244456	TRUE
cg00261781	chr2	0	TRUE
cg00271522	chr7	0	TRUE
cg00297600	chr8	0.792782	TRUE
cg00302979	chr4	1	TRUE
cg00335286	chr18	1	TRUE
cg00338702	chr12	0.254718	TRUE
cg00343092	chr22	0	TRUE
cg00347775	chr22	1	TRUE
cg00350702	chr20	0	TRUE
cg00374717	chr17	0.91133	TRUE
cg00410898	chr8	0.343442	TRUE
cg00412772	chr19	0.518934	TRUE
cg00412805	chr3	1	TRUE
cg00431549	chr12	0.516061	TRUE
cg00436603	chr10	0.390834	TRUE
cg00454305	chr16	0.0537215	TRUE
cg00462994	chr17	0	TRUE
cg00463859	chr1	0	TRUE
cg00481951	chr3	0.0769706	TRUE
cg00486113	chr6	0.698339	TRUE
cg00489401	chr5	0	TRUE
cg00503840	chr7	0	TRUE
cg00515905	chr1	1	TRUE
cg00522231	chr2	0.0196858	TRUE
cg00548098	chr16	0.550158	TRUE
cg00563932	chr9	0.505432	TRUE
cg00582628	chr8	1	TRUE
cg00593462	chr13	1	TRUE
cg00609333	chr12	1	TRUE
cg00658652	chr16	0.498218	TRUE
cg00687674	chr15	1	TRUE
cg00702638	chr3	0	TRUE
cg00717297	chr12	0.287366	TRUE
cg00740914	chr2	0.804423	TRUE
cg00744433	chr21	0.231457	TRUE
cg00748589	chr12	0	TRUE
cg00753885	chr12	0.717107	TRUE
cg00756943	chr15	0.0923709	TRUE
cg00760938	chr2	0.781819	TRUE
cg00772585	chr4	0.832258	TRUE
cg00793186	chr5	0.610396	TRUE
cg00795927	chr7	0.21047	TRUE
cg00797278	chr3	0	TRUE
cg00805193	chr20	0.242209	TRUE
cg00845900	chr7	1	TRUE
cg00850073	chr5	0.529442	TRUE
cg00862290	chr3	1	TRUE
cg00864867	chr12	0	TRUE
cg00910503	chr17	0.421525	TRUE
cg00925087	chr2	0.660187	TRUE
cg00943950	chr5	0	TRUE
cg00945507	chr7	0.383277	TRUE
cg00955230	chr7	0.134599	TRUE
cg00991848	chr16	0	TRUE
cg01027739	chr9	0.49891	TRUE
cg01027805	chr14	0.0101004	TRUE
cg01031400	chr8	0.678762	TRUE
cg01054110	chr12	0	TRUE
cg01055824	chr14	0	TRUE
cg01055871	chr19	0.0555806	TRUE
cg01056568	chr17	0.827358	TRUE
cg01059398	chr3	1	TRUE
cg01114088	chr4	0.120989	TRUE
cg01128603	chr11	0.109406	TRUE
cg01131735	chr17	0	TRUE
cg01136606	chr8	1	TRUE
cg01137065	chr17	0.137795	TRUE
cg01141812	chr6	0.0738915	TRUE
cg01176329	chr6	0.407031	TRUE
cg01196788	chr2	0	TRUE
cg01211097	chr16	0.472555	TRUE
cg01221637	chr20	0	TRUE
cg01222316	chr17	0.406088	TRUE
cg01226614	chr13	0.37885	TRUE
cg01234063	chr11	0	TRUE
cg01243072	chr2	0.617387	TRUE
cg01252496	chr19	0.752927	TRUE
cg01254459	chr14	0.178844	TRUE
cg01256539	chr5	0.210477	TRUE
cg01261503	chr17	0.323108	TRUE
cg01262913	chr21	0.403031	TRUE
cg01287592	chr8	0.257753	TRUE
cg01331772	chr2	0.432352	TRUE
cg01335367	chr12	0.349747	TRUE
cg01353448	chr7	1	TRUE
cg01356950	chr2	0	TRUE
cg01364769	chr10	0.366513	TRUE
cg01400401	chr19	0.264069	TRUE
cg01407797	chr22	0.3959	TRUE
cg01433297	chr20	0.615067	TRUE
cg01435493	chr14	0.31527	TRUE
cg01441777	chr22	0.246914	TRUE
cg01447660	chr2	0.802667	TRUE
cg01450842	chr2	0.377707	TRUE
cg01459453	chr1	1	TRUE
cg01485645	chr17	0	TRUE
cg01511232	chr4	0.445974	TRUE
cg01511567	chr11	0.267758	TRUE
cg01519742	chr4	0	TRUE
cg01527307	chr6	1	TRUE
cg01528542	chr12	0.565869	TRUE
cg01542719	chr3	0.377212	TRUE
cg01560871	chr10	1	TRUE
cg01570885	chr6	0.489652	TRUE
cg01584473	chr7	0.976688	TRUE
cg01620164	chr2	0.0423502	TRUE
cg01623187	chr20	1	TRUE
cg01626227	chr7	0.132796	TRUE
cg01644850	chr19	0	TRUE
cg01651821	chr2	0.294663	TRUE
cg01656216	chr10	1	TRUE
cg01704999	chr15	0.816743	TRUE
cg01738984	chr11	0	FALSE
cg01739167	chr17	0.391956	TRUE
cg01740766	chr6	0	TRUE
cg01752203	chr2	0.425961	TRUE
cg01757168	chr3	0	TRUE
cg01792616	chr16	0.557541	TRUE
cg01794929	chr22	0.471478	TRUE
cg01820374	chr12	0.375964	TRUE
cg01820962	chr6	0.976532	TRUE
cg01832549	chr1	0.654824	TRUE
cg01844642	chr3	0.248214	TRUE
cg01873645	chr9	0	TRUE
cg01873886	chr14	0	TRUE
cg01883408	chr5	0.119542	TRUE
cg01892695	chrX	0.714525	TRUE
cg01918706	chr1	0.187077	TRUE
cg01930621	chr19	0	TRUE
cg01946401	chr6	0.321433	TRUE
cg01949403	chr22	0.914447	TRUE
cg01968178	chr2	0	TRUE
cg02001279	chr19	0	TRUE
cg02016419	chr17	0.111006	TRUE
cg02018902	chr15	0.12304	TRUE
cg02025827	chr16	0.53286	TRUE
cg02037503	chr14	0.800444	TRUE
cg02046143	chr11	0.714242	TRUE
cg02047577	chr20	0	TRUE
cg02071305	chr15	0	TRUE
cg02085507	chr19	0.211029	TRUE
cg02085953	chr2	0.546775	TRUE
cg02151301	chr20	0.504215	TRUE
cg02151816	chr6	0.768651	TRUE
cg02154074	chr2	0.236275	TRUE
cg02181968	chr12	0.0514047	TRUE
cg02197293	chr19	0	TRUE
cg02204637	chr5	0.513209	TRUE
cg02209075	chr22	1	TRUE
cg02217159	chr6	0.586305	TRUE
cg02228185	chr17	0.315856	TRUE
cg02229946	chr2	1	TRUE
cg02244028	chr3	0.753872	TRUE
cg02272599	chr19	0.333351	TRUE
cg02275294	chr1	0.0535672	TRUE
cg02281167	chr6	0.187008	TRUE
cg02309431	chr20	0.83416	TRUE
cg02310103	chr3	0.466554	TRUE
cg02328239	chr5	0	TRUE
cg02331561	chr16	0.0422969	TRUE
cg02332492	chr9	0.716933	TRUE
cg02335441	chr3	0.51295	TRUE
cg02355868	chr16	0.405609	TRUE
cg02364642	chr12	0.257002	TRUE
cg02383785	chr7	0.268292	TRUE
cg02388150	chr8	0	TRUE
cg02426178	chr19	0.718298	TRUE
cg02426324	chr7	1	TRUE
cg02452500	chr11	1	TRUE
cg02479575	chr19	0.264069	TRUE
cg02480835	chr7	0.323362	TRUE
cg02489552	chr19	0.0903626	TRUE
cg02497428	chr16	1	TRUE
cg02503970	chr8	0	TRUE
cg02532488	chr11	0	TRUE
cg02533423	chr7	0	TRUE
cg02580606	chr17	1	TRUE
cg02631957	chr5	0	TRUE
cg02650266	chr4	0.0680755	TRUE
cg02654291	chr9	0.253652	TRUE
cg02735486	chr4	0.689502	TRUE
cg02762363	chr5	0.411826	TRUE
cg02795076	chr12	0	TRUE
cg02802055	chr9	0	TRUE
cg02821342	chr7	0	TRUE
cg02827112	chr4	0.562895	TRUE
cg02836046	chr21	0.383689	TRUE
cg02838492	chr9	0.303518	TRUE
cg02844545	chr6	0.0792071	TRUE
cg02867102	chr17	0.457997	TRUE
cg02871659	chr16	0.120218	TRUE
cg02901139	chr1	0.574475	TRUE
cg02972551	chr2	0.27342	TRUE
cg02976574	chr3	0.651664	TRUE
cg02980055	chr8	1	TRUE
cg02994956	chr22	0	TRUE
cg03007010	chr19	0	TRUE
cg03019000	chr3	0.609725	TRUE
cg03020208	chr12	0.1583	TRUE
cg03025830	chr8	0.229041	TRUE
cg03032497	chr14	0.969753	TRUE
cg03039990	chr14	0.602858	TRUE
cg03076094	chr16	0.35855	TRUE
cg03103192	chr4	0.359506	TRUE
cg03112869	chr3	1	TRUE
cg03163545	chr16	1	TRUE
cg03167275	chr21	0.268911	TRUE
cg03172991	chr19	0.82688	TRUE
cg03183882	chr3	0.311853	TRUE
cg03224418	chr20	0.0504992	TRUE
cg03232933	chr21	0.0480092	TRUE
cg03234186	chr19	0.0935877	TRUE
cg03258472	chr19	0.160599	TRUE
cg03261929	chr13	0	TRUE
cg03270204	chr6	0.260747	TRUE
cg03286783	chr15	0	TRUE
cg03330058	chr3	0.153655	TRUE
cg03340261	chr6	0	TRUE
cg03340878	chr6	0.418961	TRUE
cg03361973	chr15	0.386651	TRUE
cg03364683	chr4	0.43283	TRUE
cg03387497	chr20	1	TRUE
cg03399905	chr15	0	TRUE
cg03421353	chr5	0.228267	TRUE
cg03466124	chr3	0	TRUE
cg03467555	chr16	0.61344	TRUE
cg03473016	chr3	0.646757	TRUE
cg03473532	chr7	1	TRUE
cg03486383	chr16	0.638375	TRUE
cg03493146	chr7	0.21806	TRUE
cg03527802	chr16	0	TRUE
cg03535648	chr12	0.917971	TRUE
cg03555227	chr5	0	TRUE
cg03565081	chr14	0.756213	TRUE
cg03565323	chr17	0.127225	TRUE
cg03578041	chr15	0.455011	TRUE
cg03588357	chr14	0.337725	TRUE
cg03607117	chr3	0	TRUE
cg03619256	chr7	0.583553	TRUE
cg03623878	chr13	0.465849	TRUE
cg03633574	chr3	0.596622	TRUE
cg03638795	chr11	0.0147608	TRUE
cg03643998	chr17	0.259456	TRUE
cg03646329	chr13	0.26356	TRUE
cg03670162	chr12	0.399962	TRUE
cg03682823	chr7	0.0760114	TRUE
cg03703325	chr3	0	TRUE
cg03724882	chr14	0.144263	TRUE
cg03746976	chr16	0.338487	TRUE
cg03760483	chr17	0	TRUE
cg03771840	chr6	0.187008	TRUE
cg03773862	chr7	0.816415	TRUE
cg03788004	chr12	0	TRUE
cg03819692	chr16	1	TRUE
cg03891319	chr3	0.459734	TRUE
cg03894990	chr6	0.480232	TRUE
cg03915012	chr4	0.879114	TRUE
cg03929796	chr3	0.137164	TRUE
cg03947362	chr2	0	TRUE
cg03957108	chr2	0	TRUE
cg03958979	chr6	0	TRUE
cg03977782	chr3	0	TRUE
cg03984502	chr1	0.616437	TRUE
cg03991512	chr16	0.172287	TRUE
cg04005032	chr3	0	TRUE
cg04007936	chr16	0.671233	TRUE
cg04014889	chr15	0.480891	TRUE
cg04027548	chr12	0.658605	TRUE
cg04031656	chr16	0.288942	TRUE
cg04036898	chr1	0	TRUE
cg04055490	chr17	0.0415779	TRUE
cg04081402	chr22	0.317652	TRUE
cg04084157	chr7	0	TRUE
cg04087608	chr1	0.613388	TRUE
cg04092800	chr5	0.0580972	TRUE
cg04094160	chr9	0	TRUE
cg04105923	chr6	0.994584	TRUE
cg04121983	chr17	0	TRUE
cg04123409	chr12	0.565717	TRUE
cg04126866	chr10	0.795163	TRUE
cg04144218	chr7	1	TRUE
cg04149978	chr1	0.708641	TRUE
cg04169469	chr2	0.77347	TRUE
cg04200607	chr10	0.645552	TRUE
cg04218760	chr10	0.869742	TRUE
cg04221461	chr1	0.816838	TRUE
cg04267101	chr17	0.120218	TRUE
cg04268405	chr10	0.270496	TRUE
cg04333463	chr8	0	TRUE
cg04359302	chr3	0.792212	TRUE
cg04361926	chr16	0.462956	TRUE
cg04400972	chr1	0.171086	TRUE
cg04416734	chr16	0.149219	TRUE
cg04416752	chr9	0	TRUE
cg04424621	chr6	0.251354	TRUE
cg04431054	chr5	0.395778	TRUE
cg04436528	chr8	0.959512	TRUE
cg04452203	chr4	0.871583	TRUE
cg04452713	chr6	0.00582618	TRUE
cg04474832	chr3	0.134417	TRUE
cg04480914	chr11	0	TRUE
cg04521765	chr10	0.00924546	TRUE
cg04528819	chr7	0	TRUE
cg04576021	chr6	0.855659	TRUE
cg04596060	chr12	0.510934	TRUE
cg04601137	chr19	0	TRUE
cg04604946	chr12	0	TRUE
cg04616566	chr15	0.459171	TRUE
cg04621728	chr2	0.88185	TRUE
cg04642300	chr6	1	TRUE
cg04646282	chr15	0.809262	TRUE
cg04662594	chr8	1	TRUE
cg04684267	chr19	0.137528	TRUE
cg04709900	chr2	0.135451	TRUE
cg04718414	chr13	0.212973	TRUE
cg04736140	chr1	0.125739	TRUE
cg04749507	chr6	0.0113632	TRUE
cg04755031	chr22	0	TRUE
cg04757168	chr6	0.287818	TRUE
cg04818845	chr1	0.695186	TRUE
cg04836038	chr13	0	TRUE
cg04858164	chr15	0.989826	TRUE
cg04861640	chr6	0.46321	TRUE
cg04875128	chr15	0	TRUE
cg04937184	chr14	0.690582	TRUE
cg04940570	chr11	0	TRUE
cg04948475	chr4	1	TRUE
cg04955333	chr7	0.0572368	TRUE
cg04999352	chr11	0.337245	TRUE
cg04999691	chr7	0.919323	TRUE
cg05024939	chr4	0.0302223	TRUE
cg05087948	chr11	0.177075	TRUE
cg05089968	chr6	0.936224	TRUE
cg05106770	chr4	0.310882	TRUE
cg05125838	chr3	0.864574	TRUE
cg05228408	chr1	0	TRUE
cg05250458	chr19	0.237462	TRUE
cg05262777	chr11	1	TRUE
cg05270634	chr17	0	TRUE
cg05271255	chr17	0.73054	TRUE
cg05294243	chr19	0.192332	TRUE
cg05294455	chr17	0.938367	TRUE
cg05294577	chr14	0.202151	TRUE
cg05308819	chr1	0.592507	TRUE
cg05310309	chr2	0.46478	TRUE
cg05316065	chr8	0.879995	TRUE
cg05324516	chr10	0.706588	TRUE
cg05331214	chr2	1	TRUE
cg05365729	chr8	0.232585	TRUE
cg05379350	chr17	0	TRUE
cg05422352	chr2	0.00795562	TRUE
cg05436231	chr1	0.148302	TRUE
cg05440289	chr1	1	TRUE
cg05441133	chr10	0.737116	TRUE
cg05442902	chr22	0.504287	TRUE
cg05468948	chr6	0.478927	TRUE
cg05473871	chr19	0	TRUE
cg05488632	chr19	0	TRUE
cg05492270	chr11	0.111499	TRUE
cg05496363	chr11	0.621142	TRUE
cg05501584	chr15	0.242825	TRUE
cg05516505	chr22	0.480481	TRUE
cg05522498	chr11	1	TRUE
cg05532892	chr11	0.145187	TRUE
cg05542681	chr16	0	TRUE
cg05546763	chr14	0	TRUE
cg05590257	chr17	0	TRUE
cg05612876	chr12	0.426649	TRUE
cg05675373	chr1	0	TRUE
cg05694095	chr5	1	TRUE
cg05697249	chr11	0.372222	TRUE
cg05755779	chr8	1	TRUE
cg05759269	chr6	0.19078	TRUE
cg05780020	chr7	1	TRUE
cg05847778	chr2	0	TRUE
cg05851163	chr18	0	TRUE
cg05898102	chr5	0.498275	TRUE
cg05898618	chr11	0.539277	TRUE
cg05903609	chr17	0	TRUE
cg05915866	chr16	0	TRUE
cg05921699	chr19	1	TRUE
cg05923197	chr14	0	TRUE
cg05923226	chr19	0.0903626	TRUE
cg05928290	chr14	0.0962924	TRUE
cg05928581	chr11	0	TRUE
cg05940231	chr1	0.820982	TRUE
cg05940691	chr1	0.700577	TRUE
cg05960024	chr4	1	TRUE
cg05960039	chr20	0.476138	TRUE
cg05998295	chr8	0.949386	TRUE
cg06007201	chr16	0	TRUE
cg06044899	chr4	0.793663	TRUE
cg06048436	chr13	0.622898	TRUE
cg06068163	chr7	1	TRUE
cg06083669	chr20	0.244113	TRUE
cg06112560	chr16	0.48275	TRUE
cg06117855	chr3	0.442894	TRUE
cg06121469	chr15	0.247481	TRUE
cg06134964	chr3	0.951476	TRUE
cg06144905	chr17	0.603877	TRUE
cg06171242	chr6	0	TRUE
cg06189653	chr5	0.375061	TRUE
cg06198384	chr1	0.0282147	TRUE
cg06231995	chr9	0	TRUE
cg06291867	chr10	0	TRUE
cg06295856	chr11	0.0129789	TRUE
cg06326667	chr10	1	TRUE
cg06327515	chr5	0.196158	TRUE
cg06335143	chr1	0	TRUE
cg06361108	chr16	0	TRUE
cg06363129	chr7	0.595588	TRUE
cg06396324	chr19	1	TRUE
cg06416491	chr12	0.0171732	TRUE
cg06419846	chr11	0.651901	TRUE
cg06430061	chr5	0.811621	TRUE
cg06448705	chr5	0.799825	TRUE
cg06455149	chr8	0	TRUE
cg06457011	chr20	0.0260562	TRUE
cg06458239	chr19	0.875527	TRUE
cg06462220	chr6	0.392885	TRUE
cg06462291	chr12	0.0125532	TRUE
cg06493994	chr6	0.445396	TRUE
cg06513075	chr11	0	TRUE
cg06526721	chr5	0.160963	TRUE
cg06532163	chr17	0.234927	TRUE
cg06533629	chr7	0.261009	TRUE
cg06547285	chr12	1	TRUE
cg06557358	chr17	0	TRUE
cg06574422	chr12	0	TRUE
cg06637774	chr11	0	TRUE
cg06638433	chr17	0	TRUE
cg06638451	chr3	1	TRUE
cg06639320	chr2	0.0372852	TRUE
cg06648759	chr13	1	TRUE
cg06672696	chr3	1	TRUE
cg06685111	chr6	0.361988	TRUE
cg06688848	chr16	0	TRUE
cg06690548	chr4	0.353558	TRUE
cg06712013	chr12	0.590222	TRUE
cg06737494	chr3	0.17822	TRUE
cg06738602	chr14	0.279169	TRUE
cg06758350	chr21	0	TRUE
cg06784991	chr1	0	TRUE
cg06796779	chr3	0	TRUE
cg06805925	chr17	0.796356	TRUE
cg06810647	chr16	0.165142	TRUE
cg06819923	chr16	0.953977	TRUE
cg06836406	chr9	0	TRUE
cg06836772	chr1	0.514915	TRUE
cg06852243	chr17	0.566984	TRUE
cg06874016	chr17	0.485855	TRUE
cg06888746	chr10	0.680928	TRUE
cg06908778	chr10	0.0598732	TRUE
cg06926735	chr20	0.288533	TRUE
cg06952310	chr19	0.847235	TRUE
cg06958034	chr1	0	TRUE
cg06975499	chr17	0	TRUE
cg06993413	chr15	0.320641	TRUE
cg06994793	chr5	0	TRUE
cg07016730	chr22	0.622006	TRUE
cg07038400	chr3	0.263197	TRUE
cg07040244	chr1	0.376526	TRUE
cg07066898	chr19	0	TRUE
cg07073120	chr17	0	TRUE
cg07073964	chr19	1	TRUE
cg07077459	chr6	0	FALSE
cg07080372	chr11	0	TRUE
cg07082267	chr16	0.441934	TRUE
cg07095347	chr6	0.705618	TRUE
cg07101980	chr11	0.824227	TRUE
cg07110949	chr4	0.833301	TRUE
cg07115626	chr14	0.438202	TRUE
cg07158339	chr9	0.137933	TRUE
cg07172885	chr12	0.365067	TRUE
cg07180649	chr1	0	TRUE
cg07207669	chr1	0.23273	TRUE
cg07211259	chr9	1	TRUE
cg07236943	chr7	0.197645	TRUE
cg07248223	chr17	0.944769	TRUE
cg07265300	chr2	0.141163	TRUE
cg07285276	chr9	0.271261	TRUE
cg07291563	chr19	0.0945864	TRUE
cg07303143	chr3	0	TRUE
cg07312601	chr1	0.96588	TRUE
cg07319199	chr2	0.82385	TRUE
cg07320140	chr16	0.164831	TRUE
cg07337598	chr1	1	TRUE
cg07374224	chr21	0.586594	TRUE
cg07388493	chr1	0.0845039	TRUE
cg07408456	chr19	1	TRUE
cg07455279	chr19	0	TRUE
cg07484827	chr11	1	TRUE
cg07494518	chr21	0	TRUE
cg07498421	chr12	0.0123001	TRUE
cg07502389	chr8	0	TRUE
cg07536102	chr17	0	TRUE
cg07547549	chr20	0	TRUE
cg07553761	chr3	0	TRUE
cg07571951	chr7	0.0139623	TRUE
cg07583137	chr8	0.912312	TRUE
cg07584066	chr17	0.171405	TRUE
cg07589899	chr2	0.262944	TRUE
cg07595943	chr16	0.869682	TRUE
cg07621046	chr10	0.146094	TRUE
cg07638500	chr3	0.98688	TRUE
cg07654934	chr3	0.285955	TRUE
cg07663789	chr5	0	TRUE
cg07717903	chr5	0.148953	TRUE
cg07730301	chr11	0.206625	TRUE
cg07752420	chr9	0	FALSE
cg07770222	chr8	0.486958	TRUE
cg07809484	chr19	0.120272	TRUE
cg07810156	chr1	1	TRUE
cg07810190	chr6	0.30887	TRUE
cg07817698	chr16	0.275577	TRUE
cg07825606	chr16	0.890355	TRUE
cg07849904	chr22	0.0352664	TRUE
cg07850154	chr5	0.459635	TRUE
cg07850604	chr14	0	TRUE
cg07906193	chr10	1	TRUE
cg07927379	chr7	0	TRUE
cg07929310	chr16	0.157129	TRUE
cg07955995	chr7	0	TRUE
cg07978099	chr16	0.0873909	TRUE
cg08012287	chr11	0.322985	TRUE
cg08030082	chr2	0	TRUE
cg08035942	chr18	0	TRUE
cg08038054	chr7	0.207783	TRUE
cg08067365	chr1	0.578967	TRUE
cg08074477	chr17	1	TRUE
cg08090640	chr17	1	TRUE
cg08090772	chr8	0	TRUE
cg08097417	chr7	0	TRUE
cg08124722	chr17	1	TRUE
cg08151809	chr7	0.839874	TRUE
cg08166272	chr2	0.115486	TRUE
cg08169325	chr12	0.121593	TRUE
cg08186124	chr3	0	TRUE
cg08207604	chr6	0.259827	TRUE
cg08209133	chr4	0	TRUE
cg08212685	chr5	0	TRUE
cg08234504	chr5	0.837027	TRUE
cg08251036	chr2	0.9501	TRUE
cg08251399	chr2	0.167	TRUE
cg08276993	chr10	0.767983	TRUE
cg08280936	chr7	0.0592098	TRUE
cg08313880	chr17	0	FALSE
cg08329113	chr16	0.012151	TRUE
cg08331960	chr16	0.0695402	TRUE
cg08357125	chr2	0.123799	TRUE
cg08370996	chr15	0	TRUE
cg08397927	chr19	0	TRUE
cg08413469	chr1	0.470122	TRUE
cg08415592	chr22	1	TRUE
cg08420066	chr6	0.23231	TRUE
cg08424423	chr6	0.573766	TRUE
cg08429256	chr17	0	TRUE
cg08434234	chr7	0.309001	TRUE
cg08448547	chr8	0.804647	TRUE
cg08454546	chr15	0.350022	TRUE
cg08468401	chr3	0.368605	TRUE
cg08468689	chr17	0.433768	TRUE
cg08475827	chr2	0.170966	TRUE
cg08487374	chr7	0	TRUE
cg08529529	chr13	0.987021	TRUE
cg08540945	chr7	0.453686	TRUE
cg08573679	chr6	0.206194	TRUE
cg08586737	chr7	0.206527	TRUE
cg08587542	chr5	0.78841	TRUE
cg08598221	chr8	0.25029	TRUE
cg08622677	chr12	0	TRUE
cg08654655	chr1	0.179024	TRUE
cg08657705	chr5	0.766456	TRUE
cg08668790	chr19	0.17561	TRUE
cg08694544	chr19	0	TRUE
cg08761208	chr15	0.518707	TRUE
cg08771731	chr5	0.491281	TRUE
cg08822715	chr12	0.547844	TRUE
cg08872493	chr1	1	TRUE
cg08896629	chr19	0.0256224	TRUE
cg08899632	chr20	0.0801815	TRUE
cg08900043	chr12	0	TRUE
cg08908643	chr5	1	TRUE
cg08911208	chr7	0.564542	TRUE
cg08949164	chr16	0	TRUE
cg08963419	chr19	0	TRUE
cg08965235	chr11	0	TRUE
cg08993878	chr12	1	TRUE
cg09019938	chr10	0.0660249	TRUE
cg09025210	chr3	0.0588132	TRUE
cg09045681	chr6	0	TRUE
cg09096950	chr11	0.531262	TRUE
cg09118625	chr1	1	TRUE
cg09133026	chr14	1	TRUE
cg09143195	chr12	0.582819	TRUE
cg09155044	chr16	0.793275	TRUE
cg09164913	chr17	0.513221	TRUE
cg09183146	chr16	0.0537215	TRUE
cg09191327	chr9	0	TRUE
cg09196959	chr6	0.896335	TRUE
cg09254939	chr19	0.415729	TRUE
cg09255514	chr16	0.891374	TRUE
cg09294589	chr3	0.095021	TRUE
cg09304040	chr12	0.00450796	TRUE
cg09315264	chr1	1	TRUE
cg09322949	chr6	0	TRUE
cg09367901	chr14	0	TRUE
cg09383860	chr11	0.652175	TRUE
cg09404633	chr1	0.0416378	TRUE
cg09413557	chr1	0.26854	TRUE
cg09418283	chr12	0	TRUE
cg09428349	chr21	0.194531	TRUE
cg09432590	chr10	0	TRUE
cg09434995	chr7	0.838687	TRUE
cg09436502	chr7	0.312191	TRUE
cg09441152	chr18	0	TRUE
cg09462576	chr1	0.166236	TRUE
cg09480837	chr10	1	TRUE
cg09509673	chr17	0.315022	TRUE
cg09524078	chr3	0.647698	TRUE
cg09548179	chr16	0	TRUE
cg09556292	chr14	0	TRUE
cg09604333	chr20	0.476138	TRUE
cg09624858	chr6	1	TRUE
cg09630437	chr19	0.407976	TRUE
cg09646392	chr13	0.826618	TRUE
cg09651136	chr15	0.190308	TRUE
cg09652142	chr3	0.825073	TRUE
cg09671951	chr10	0.571235	TRUE
cg09678615	chr16	0.397594	TRUE
cg09692396	chr12	0	TRUE
cg09722397	chr17	0	TRUE
cg09722555	chr9	0.767742	TRUE
cg09748749	chr7	0.326255	TRUE
cg09785172	chr4	0	TRUE
cg09799873	chr19	0.489861	TRUE
cg09809672	chr1	0.704358	TRUE
cg09851465	chr1	1	TRUE
cg09869858	chr12	1	TRUE
cg09885951	chr1	0	TRUE
cg09892203	chr17	0	TRUE
cg09929187	chr12	0.748397	TRUE
cg09935271	chr19	0	TRUE
cg09993145	chr1	0.384633	TRUE
cg10036013	chr7	0.303621	TRUE
cg10045881	chr1	0.80874	TRUE
cg10052840	chr19	0.452825	TRUE
cg10106965	chr3	0.368949	TRUE
cg10158181	chr4	0.0514676	TRUE
cg10192196	chr6	0.565295	TRUE
cg10202457	chr1	0.0574847	TRUE
cg10203610	chr4	0	TRUE
cg10225525	chr14	0.41427	TRUE
cg10266490	chr1	0.0663868	TRUE
cg10281002	chr12	0.0838166	TRUE
cg10308629	chr7	0.0590264	TRUE
cg10345936	chr5	0.50817	TRUE
cg10376763	chr2	0.934031	TRUE
cg10377274	chr11	1	TRUE
cg10453071	chr16	0	TRUE
cg10486998	chr18	0	TRUE
cg10495047	chr5	0	TRUE
cg10498798	chr19	0.663671	TRUE
cg10501210	chr1	0.521282	TRUE
cg10523019	chr2	0	TRUE
cg10570177	chr9	0.356881	TRUE
cg10586358	chr19	0.00597265	TRUE
cg10591174	chr12	0.728973	TRUE
cg10619342	chr15	1	TRUE
cg10625705	chr20	0	TRUE
cg10636246	chr1	0.80661	TRUE
cg10636297	chr21	0.394211	TRUE
cg10644544	chr17	0	TRUE
cg10647101	chr22	0.0980241	TRUE
cg10654016	chr12	0	TRUE
cg10658666	chr2	0	TRUE
cg10667970	chr1	0.0226066	TRUE
cg10669058	chr19	0	TRUE
cg10699171	chr6	0.934826	TRUE
cg10699857	chr4	0	TRUE
cg10729426	chr19	0.875527	TRUE
cg10772169	chr1	0.326122	TRUE
cg10795646	chr1	1	TRUE
cg10804656	chr10	0	TRUE
cg10825530	chr11	0.937316	TRUE
cg10837404	chr5	1	TRUE
cg10855531	chr2	0.150824	TRUE
cg10865119	chr6	0.220137	TRUE
cg10878896	chr12	0	TRUE
cg10900550	chr9	0.353658	TRUE
cg10905180	chr11	0.92048	TRUE
cg10917602	chr16	0.348309	TRUE
cg10920957	chr16	0.0360883	TRUE
cg10922280	chr16	0.593862	TRUE
cg10940099	chr6	0	TRUE
cg10959651	chr2	0.983197	TRUE
cg11006267	chr5	0	TRUE
cg11025793	chr19	0	TRUE
cg11051055	chr8	0	TRUE
cg11067179	chr11	0.97268	TRUE
cg11071401	chr17	0	TRUE
cg11084334	chr3	0	TRUE
cg11092416	chr6	0.24272	TRUE
cg11117945	chr20	0.57387	TRUE
cg11136562	chr5	0.0381057	TRUE
cg11177450	chr3	0.499913	TRUE
cg11205552	chr3	0.221556	TRUE
cg11220950	chr16	0.0176332	TRUE
cg11233384	chr1	0.252637	TRUE
cg11237115	chr3	0	TRUE
cg11271171	chr5	1	TRUE
cg11298786	chr1	0	TRUE
cg11299964	chr9	0.536618	TRUE
cg11314684	chr1	0.796148	TRUE
cg11388238	chr2	0.416817	TRUE
cg11426590	chr1	0.0433755	TRUE
cg11459714	chr19	0.0352664	TRUE
cg11487705	chr5	0	TRUE
cg11490446	chr14	0.464402	TRUE
cg11491284	chr3	0.918665	TRUE
cg11529819	chr1	0.317933	TRUE
cg11600161	chr11	0.596589	TRUE
cg11618577	chr2	0	TRUE
cg11620135	chr17	0.107788	TRUE
cg11631518	chr12	0.454703	TRUE
cg11653233	chr17	0.191988	TRUE
cg11653266	chr17	0.0136204	TRUE
cg11671968	chr7	0.443063	TRUE
cg11705975	chr10	0	TRUE
cg11714320	chr12	0.197473	TRUE
cg11718162	chr1	0.589606	TRUE
cg11766468	chr19	0.732707	TRUE
cg11789321	chr5	1	TRUE
cg11804928	chr17	0	TRUE
cg11807280	chr2	0.465437	TRUE
cg11830800	chr12	0.566284	TRUE
cg11832534	chr1	1	TRUE
cg11833861	chr17	0	TRUE
cg11858226	chr7	0.0847996	TRUE
cg11896923	chr17	0.0100287	TRUE
cg11903057	chr4	0.9042	TRUE
cg11932564	chr22	0	FALSE
cg12068124	chr19	0.424781	TRUE
cg12082609	chr2	1	TRUE
cg12105450	chr2	0.563287	TRUE
cg12134570	chr19	0.0528427	TRUE
cg12138483	chr19	0.431566	TRUE
cg12140144	chr1	0.621728	TRUE
cg12145907	chr5	0	TRUE
cg12177001	chr14	1	TRUE
cg12188560	chr9	0.197115	TRUE
cg12238343	chr5	0	TRUE
cg12247247	chr17	0	TRUE
cg12258344	chr2	0.721612	TRUE
cg12261786	chr10	0	TRUE
cg12265604	chr16	0.0689543	TRUE
cg12269343	chr14	0.749699	TRUE
cg12289045	chr19	0.827509	TRUE
cg12303084	chr20	0	TRUE
cg12324144	chr3	0.679463	TRUE
cg12328429	chr11	1	TRUE
cg12350474	chr17	0.313839	TRUE
cg12351433	chr2	0.247231	TRUE
cg12373771	chr22	0	TRUE
cg12379720	chr22	0	TRUE
cg12402251	chr8	0.0514047	TRUE
cg12413566	chr3	1	TRUE
cg12419932	chr18	0.699043	TRUE
cg12424329	chr13	0.434422	TRUE
cg12459502	chr18	0.702267	TRUE
cg12473775	chr11	0.0352664	TRUE
cg12477880	chr21	0	TRUE
cg12483947	chr10	1	TRUE
cg12490835	chr10	0.0867784	TRUE
cg12506930	chr19	0.196702	TRUE
cg12530994	chr10	0.85542	TRUE
cg12554573	chr3	0.257367	TRUE
cg12578166	chr11	0.091657	TRUE
cg12608692	chr5	0.802004	TRUE
cg12616277	chr3	0.0352664	TRUE
cg12649038	chr10	1	TRUE
cg12743894	chr11	0.070419	TRUE
cg12753631	chr6	1	TRUE
cg12757011	chr2	0.299992	TRUE
cg12757684	chr6	1	TRUE
cg12768605	chr19	0.621591	TRUE
cg12776156	chr11	0.40791	TRUE
cg12788037	chr17	0	TRUE
cg12813792	chr20	0.709586	TRUE
cg12830694	chr19	0.600543	TRUE
cg12864235	chr5	0.817519	TRUE
cg12869659	chr1	0.451097	TRUE
cg12883767	chr12	0.178175	TRUE
cg12899747	chr3	1	TRUE
cg12934320	chr11	1	TRUE
cg12939283	chr6	0.592234	TRUE
cg12941369	chr3	0.295159	TRUE
cg12946225	chr19	0	TRUE
cg12948621	chr19	0	TRUE
cg12968224	chr3	0.813452	TRUE
cg12985418	chr18	0.283292	TRUE
cg12991365	chr3	0	TRUE
cg13001142	chr6	0.0913131	TRUE
cg13027206	chr14	0.70688	TRUE
cg13029847	chr17	0.00655853	TRUE
cg13033858	chr12	0.211615	TRUE
cg13038560	chr2	0.449444	TRUE
cg13042288	chr15	0.865458	TRUE
cg13093111	chr17	0.951432	TRUE
cg13119609	chr19	0.987699	TRUE
cg13120519	chr19	0.611571	TRUE
cg13129046	chr10	0.468535	TRUE
cg13149736	chr2	0.438187	TRUE
cg13216057	chr11	0	TRUE
cg13218906	chr20	0	TRUE
cg13221458	chr6	0.262879	TRUE
cg13258700	chr7	0.0633885	TRUE
cg13269407	chr22	0.0352664	TRUE
cg13278496	chr3	0.157855	TRUE
cg13296371	chr4	0.721806	TRUE
cg13302154	chr12	0.564884	TRUE
cg13307384	chr12	0.12139	TRUE
cg13319175	chr1	0.738846	TRUE
cg13323474	chr10	0	TRUE
cg13351161	chr8	0.113481	TRUE
cg13388466	chr17	0.323499	TRUE
cg13406950	chr1	0	FALSE
cg13409216	chr10	0	TRUE
cg13409704	chr22	0.079793	TRUE
cg13449372	chr10	1	TRUE
cg13460409	chr21	0.184148	TRUE
cg13462622	chr9	0.669617	TRUE
cg13491731	chr14	0.777722	TRUE
cg13509147	chr19	1	TRUE
cg13510262	chr12	0	TRUE
cg13514050	chr20	0.022963	TRUE
cg13547237	chr11	0.248525	TRUE
cg13550877	chr14	1	TRUE
cg13564075	chr17	0	TRUE
cg13567282	chr6	0.490849	TRUE
cg13571802	chr3	1	TRUE
cg13575542	chr3	0.893308	TRUE
cg13586038	chr9	0.630171	TRUE
cg13587552	chr1	0.435034	TRUE
cg13593287	chr14	0.761313	TRUE
cg13612317	chr10	0.565159	TRUE
cg13613532	chr11	0.123814	TRUE
cg13615100	chr15	1	TRUE
cg13617776	chr19	0.742857	TRUE
cg13631913	chr1	0	TRUE
cg13649056	chr9	0	TRUE
cg13654195	chr6	0	TRUE
cg13656062	chr19	1	TRUE
cg13656360	chr11	0.0352664	TRUE
cg13663218	chr12	0.222747	TRUE
cg13674411	chr1	0.297936	TRUE
cg13682722	chr14	0.164344	TRUE
cg13683374	chr17	0.663899	TRUE
cg13700897	chr8	0.577234	TRUE
cg13718960	chr14	0.769674	TRUE
cg13734401	chr9	0.804588	TRUE
cg13739066	chr14	1	TRUE
cg13767001	chr13	0.486645	TRUE
cg13783238	chr3	1	TRUE
cg13807496	chr11	0.060752	TRUE
cg13824500	chr10	1	TRUE
cg13828047	chr15	0.108373	TRUE
cg13828440	chr12	1	TRUE
cg13836627	chr15	0	TRUE
cg13843773	chr4	0.189589	TRUE
cg13848598	chr10	0.1583	TRUE
cg13854874	chr21	0	TRUE
cg13861644	chr12	0	TRUE
cg13870494	chr9	0.606851	TRUE
cg13870866	chr7	0.00115928	TRUE
cg13899108	chr19	0.6598	TRUE
cg13909661	chr12	1	TRUE
cg13917614	chr17	0.422908	TRUE
cg13931228	chr7	0.0831618	TRUE
cg13937040	chr15	0	TRUE
cg13975369	chr7	0	FALSE
cg13994175	chr3	0	TRUE
cg14009688	chr7	0.179342	TRUE
cg14010720	chr20	0.58836	TRUE
cg14059835	chr9	0.384666	TRUE
cg14060828	chr19	0	TRUE
cg14074174	chr19	0.201362	TRUE
cg14098795	chr17	0	TRUE
cg14105047	chr4	0	TRUE
cg14159818	chr20	0	TRUE
cg14162417	chr1	0.75604	TRUE
cg14163776	chr3	0.397811	TRUE
cg14175438	chr7	0.402405	TRUE
cg14209784	chr10	0	TRUE
cg14223995	chr4	0	TRUE
cg14224203	chr9	0.465885	TRUE
cg14258236	chr6	0.723235	TRUE
cg14281160	chr12	0.49189	TRUE
cg14308452	chr19	0.775622	TRUE
cg14314729	chr5	0.463738	TRUE
cg14329157	chr2	0.155224	TRUE
cg14334310	chr14	0.0669037	TRUE
cg14345676	chr5	0.683522	TRUE
cg14350002	chr9	0	TRUE
cg14359680	chr14	0.207762	TRUE
cg14361627	chr7	0	TRUE
cg14396995	chr7	0.691421	TRUE
cg14408969	chr8	0.37873	TRUE
cg14409958	chr8	0.529202	TRUE
cg14411282	chr9	1	TRUE
cg14423778	chr3	0.261233	TRUE
cg14424579	chr2	0	TRUE
cg14456683	chr3	0	TRUE
cg14467840	chr1	0	TRUE
cg14473016	chr22	0.284583	TRUE
cg14501253	chr8	0	TRUE
cg14522800	chr17	0	TRUE
cg14550518	chr3	0.117196	TRUE
cg14556683	chr19	0	TRUE
cg14565725	chr1	0.711686	TRUE
cg14597908	chr20	0.246768	TRUE
cg14614643	chr1	1	TRUE
cg14654875	chr16	0.458174	TRUE
cg14658362	chr8	0.018231	TRUE
cg14676592	chr16	0.185714	TRUE
cg14689355	chr2	0	TRUE
cg14692377	chr17	0	TRUE
cg14699004	chr4	0.134572	TRUE
cg14723032	chr17	0.193462	TRUE
cg14727952	chr11	0	TRUE
cg14746276	chr5	0.556863	TRUE
cg14747225	chr16	0.146316	TRUE
cg14748856	chr5	1	TRUE
cg14753631	chr12	0.812386	TRUE
cg14754581	chr3	0.318551	TRUE
cg14757228	chr6	0.273921	TRUE
cg14776578	chr10	0.626676	TRUE
cg14847502	chr10	0.0930551	TRUE
cg14894144	chr18	0.408251	TRUE
cg14911690	chr19	0	TRUE
cg14916213	chr11	0	TRUE
cg14918082	chr17	0	TRUE
cg14962509	chr1	0	TRUE
cg14972143	chr4	0.320881	TRUE
cg14992253	chr1	0.301909	TRUE
cg15013019	chr19	0.0528427	TRUE
cg15015340	chr11	0.566255	TRUE
cg15059474	chr7	0.613861	TRUE
cg15089077	chr1	0.413417	TRUE
cg15110296	chr12	0.641603	TRUE
cg15149655	chr2	0	TRUE
cg15171237	chr4	0.0186704	TRUE
cg15185286	chr6	0	TRUE
cg15188939	chr15	1	TRUE
cg15195412	chr16	0.348148	TRUE
cg15201877	chr1	0	TRUE
cg15220605	chr17	0.620989	TRUE
cg15262928	chr1	0	TRUE
cg15277914	chr3	0.3555	TRUE
cg15297650	chr2	0.941559	TRUE
cg15338967	chr13	1	TRUE
cg15339075	chr6	0.789121	TRUE
cg15341340	chr19	0.0689543	TRUE
cg15344028	chr2	0.875752	TRUE
cg15379633	chr22	0	TRUE
cg15381313	chr12	1	TRUE
cg15381769	chr6	0	TRUE
cg15393490	chr1	1	TRUE
cg15405572	chr12	0.760588	TRUE
cg15427448	chr11	0.1583	TRUE
cg15447479	chr7	0.1583	TRUE
cg15480367	chr14	0.104134	TRUE
cg15489301	chr7	1	TRUE
cg15498283	chr11	0	TRUE
cg15519474	chr17	0.277149	TRUE
cg15538427	chr11	0.0709014	TRUE
cg15547534	chr7	0.399122	TRUE
cg15551881	chr9	0.261644	TRUE
cg15553770	chr11	1	TRUE
cg15569512	chr14	0.00182645	TRUE
cg15603896	chr7	0.202566	TRUE
cg15611364	chr3	0.36901	TRUE
cg15642326	chr19	0.0424311	TRUE
cg15648389	chr12	0.333531	TRUE
cg15661409	chr14	0.522279	TRUE
cg15673540	chr17	0	TRUE
cg15703512	chr16	0.601769	TRUE
cg15774391	chr17	0	TRUE
cg15804973	chr6	0.276807	TRUE
cg15811427	chr19	1	TRUE
cg15845821	chr19	0.576304	TRUE
cg15856055	chr10	0.803917	TRUE
cg15881088	chr3	0	TRUE
cg15887846	chr11	0.541429	TRUE
cg15900052	chr1	1	TRUE
cg15903032	chr10	0.235663	TRUE
cg15903282	chr3	0.406633	TRUE
cg15910502	chr3	0.529566	TRUE
cg15936446	chr5	0	TRUE
cg15963417	chr12	0.784387	TRUE
cg15966757	chr12	0.875554	TRUE
cg15974053	chr19	0	TRUE
cg15988232	chr3	0.287148	TRUE
cg16008966	chr1	0.720939	TRUE
cg16012294	chr7	1	TRUE
cg16032108	chr11	1	TRUE
cg16034652	chr14	0.0741193	TRUE
cg16054275	chr1	0.659666	TRUE
cg16085042	chr12	0.1583	TRUE
cg16150435	chr6	0.671175	TRUE
cg16168311	chr1	0.0589627	TRUE
cg16173067	chr20	0.858017	TRUE
cg16181396	chr3	0.0549319	TRUE
cg16241714	chr8	0	TRUE
cg16243756	chr8	0.458681	TRUE
cg16255583	chr6	1	TRUE
cg16281600	chr5	0.421837	TRUE
cg16295988	chr9	0.199497	TRUE
cg16313343	chr14	0.201362	TRUE
cg16314254	chr1	0.636237	TRUE
cg16319578	chr14	0	TRUE
cg16333846	chr6	0.598693	TRUE
cg16340918	chr10	0.098834	TRUE
cg16352283	chr1	0.139068	TRUE
cg16354207	chr2	0.355979	TRUE
cg16357381	chr3	0.0519004	TRUE
cg16358826	chr4	0.418791	TRUE
cg16363586	chr19	0.212308	TRUE
cg16372520	chr14	0.661449	TRUE
cg16374999	chr12	0.322238	TRUE
cg16386080	chr9	0.169009	TRUE
cg16408394	chr9	0.0422969	TRUE
cg16408970	chr10	0	TRUE
cg16419235	chr8	0.00684461	TRUE
cg16419345	chr17	0.260365	TRUE
cg16466334	chr11	1	TRUE
cg16477091	chr17	0.222358	TRUE
cg16494477	chr5	0	TRUE
cg16514113	chr16	0.409328	TRUE
cg16543027	chr15	0.814348	TRUE
cg16547529	chr11	0.269081	TRUE
cg16579101	chr12	0	TRUE
cg16584662	chr15	0.782793	TRUE
cg16599143	chr1	1	TRUE
cg16608498	chr5	0.362634	TRUE
cg16612562	chr22	0.446551	TRUE
cg16618104	chr12	0.0212054	TRUE
cg16618789	chr7	1	TRUE
cg16648841	chr1	1	TRUE
cg16703882	chr3	0	TRUE
cg16713727	chr1	0.44743	TRUE
cg16717122	chr15	0.380123	TRUE
cg16718891	chr12	0	TRUE
cg16728114	chr1	0.301381	TRUE
cg16743289	chr1	0.285827	TRUE
cg16744741	chr4	0.525046	TRUE
cg16816226	chr3	0	TRUE
cg16852756	chr7	0.655577	TRUE
cg16854606	chr19	0.509437	TRUE
cg16867657	chr6	0.284849	TRUE
cg16899442	chr16	0.213959	TRUE
cg16933388	chr3	0.237304	TRUE
cg16983159	chr5	0.249912	TRUE
cg16984944	chr3	0.495089	TRUE
cg17009433	chr9	0	TRUE
cg17038116	chr1	0	TRUE
cg17063929	chr11	0.00381416	TRUE
cg17099569	chr2	0.873566	TRUE
cg17110586	chr19	0.70221	TRUE
cg17129388	chr17	0.0407593	TRUE
cg17133388	chr3	0	TRUE
cg17163168	chr1	0.159541	TRUE
cg17168836	chr1	0.829672	TRUE
cg17183905	chr12	0.709687	TRUE
cg17243289	chr18	0.621988	TRUE
cg17254383	chr17	0.48315	TRUE
cg17266282	chr6	1	TRUE
cg17274064	chr21	0.380066	TRUE
cg17285325	chr22	0.0352664	TRUE
cg17321954	chr3	0.267517	TRUE
cg17324128	chr10	0.193554	TRUE
cg17338403	chr15	0.268331	TRUE
cg17338821	chr3	0.03086	TRUE
cg17408647	chr7	0.00450797	TRUE
cg17421623	chr3	0.220118	TRUE
cg17431739	chr10	0.591746	TRUE
cg17471102	chr19	0.688913	TRUE
cg17472796	chr11	0.864829	TRUE
cg17526300	chr10	0.00328592	TRUE
cg17536848	chr7	0.0557721	TRUE
cg17589341	chr18	0.0889007	TRUE
cg17605084	chr12	1	TRUE
cg17607231	chr2	1	TRUE
cg17616646	chr11	0.346029	TRUE
cg17621438	chr5	0.533996	TRUE
cg17627559	chr11	0	TRUE
cg17641104	chr12	0	TRUE
cg17655614	chr16	0.110506	TRUE
cg17686885	chr17	0.122654	TRUE
cg17726022	chr12	0	TRUE
cg17729667	chr20	0	TRUE
cg17749443	chr9	0.221759	TRUE
cg17769442	chr19	0.00890203	TRUE
cg17770886	chr10	0.803917	TRUE
cg17782713	chr10	0.191224	TRUE
cg17791651	chr1	0	TRUE
cg17853587	chr4	0.749476	TRUE
cg17861230	chr19	0.0967834	TRUE
cg17879376	chr1	0.922473	TRUE
cg17882660	chr13	0	TRUE
cg17896249	chr16	0.0422276	TRUE
cg17903544	chr12	0.0989995	TRUE
cg17923358	chr7	0	TRUE
cg17940013	chr1	0	TRUE
cg17953385	chr10	0	TRUE
cg17960516	chr4	0	TRUE
cg17966192	chr2	0.744326	TRUE
cg18001427	chr21	0.0311356	TRUE
cg18003795	chr22	0.906822	TRUE
cg18031008	chr1	0.463353	TRUE
cg18055007	chr6	0.347978	TRUE
cg18064714	chr7	0	TRUE
cg18117393	chr1	1	TRUE
cg18125510	chr14	0.383034	TRUE
cg18139769	chr7	0.0760114	TRUE
cg18180783	chr10	0.940866	TRUE
cg18182399	chr2	0	TRUE
cg18240463	chr1	1	TRUE
cg18241647	chr20	1	TRUE
cg18244483	chr4	0.853635	TRUE
cg18267374	chr8	0	TRUE
cg18281842	chr11	1	TRUE
cg18303397	chr3	0	TRUE
cg18310639	chr1	0.924494	TRUE
cg18328933	chr3	0.134417	TRUE
cg18335931	chr19	0	TRUE
cg18343474	chr1	0.0527096	TRUE
cg18384097	chr1	1	TRUE
cg18392482	chr12	0.408606	TRUE
cg18440048	chr22	0	TRUE
cg18442362	chr7	1	TRUE
cg18448426	chr22	1	TRUE
cg18450254	chr3	0.601516	TRUE
cg18457597	chr17	0.947798	TRUE
cg18468088	chr6	0.397391	TRUE
cg18468844	chr1	1	TRUE
cg18473521	chr12	0	TRUE
cg18501647	chr6	0.432445	TRUE
cg18537454	chr10	0.276114	TRUE
cg18573383	chr12	0.371474	TRUE
cg18582260	chr13	0.0379295	TRUE
cg18587364	chr19	0.0436981	TRUE
cg18633600	chr12	0.475538	TRUE
cg18660898	chr1	0.133278	TRUE
cg18691434	chr7	0.124828	TRUE
cg18693704	chr16	0.293912	TRUE
cg18732541	chr19	0.557246	TRUE
cg18738190	chr10	0.147177	TRUE
cg18769120	chr7	0.890945	TRUE
cg18771300	chr14	0.53578	TRUE
cg18809289	chr10	0	TRUE
cg18826352	chr20	0.756894	TRUE
cg18875012	chr3	0.189052	TRUE
cg18881501	chr17	0	TRUE
cg18917643	chr5	0.903734	TRUE
cg18933331	chr1	0.901884	TRUE
cg18956095	chr8	0	TRUE
cg18983672	chr1	0.178953	TRUE
cg18984151	chr3	0.281334	TRUE
cg18996776	chr3	0.0635735	TRUE
cg19008809	chr3	0	TRUE
cg19015086	chr22	0.0195877	TRUE
cg19028160	chr2	0	TRUE
cg19031565	chr17	0.390508	TRUE
cg19034084	chr5	0.700264	TRUE
cg19044674	chr1	0	TRUE
cg19046959	chr1	0.0270642	TRUE
cg19104072	chr11	0.0176902	TRUE
cg19149785	chr19	0.943968	TRUE
cg19166302	chr3	0.205481	TRUE
cg19167673	chr22	0.113346	TRUE
cg19203457	chr6	0.655789	TRUE
cg19269039	chr1	0.573127	TRUE
cg19273182	chr2	0	TRUE
cg19283806	chr18	1	TRUE
cg19287114	chr9	0	TRUE
cg19297232	chr16	0.323837	TRUE
cg19305227	chr15	1	TRUE
cg19343530	chr6	0.0991269	TRUE
cg19345165	chr11	0	TRUE
cg19346193	chr10	0.512232	TRUE
cg19356189	chr19	0.364648	TRUE
cg19371795	chr19	0.161899	TRUE
cg19378133	chr16	0.399826	TRUE
cg19381811	chr3	0.681723	TRUE
cg19398783	chr4	1	TRUE
cg19420968	chr1	0.925454	TRUE
cg19439331	chr10	0	TRUE
cg19478743	chr17	0	TRUE
cg19497517	chr8	0.0250136	TRUE
cg19505546	chr5	0	TRUE
cg19514469	chr16	0.205463	TRUE
cg19514928	chr1	0.644079	TRUE
cg19556572	chr9	1	TRUE
cg19560210	chr1	0.784209	TRUE
cg19566405	chr17	0	TRUE
cg19569684	chr5	0.616734	TRUE
cg19573166	chr14	0.484766	TRUE
cg19583819	chr5	0.610396	TRUE
cg19586576	chr17	0.0571169	TRUE
cg19596273	chr10	0.0930551	TRUE
cg19615059	chr12	0	TRUE
cg19632206	chr1	0	TRUE
cg19662687	chr1	0.633228	TRUE
cg19663246	chr7	0.646989	TRUE
cg19663795	chr16	1	TRUE
cg19685066	chr1	1	TRUE
cg19686152	chr15	0.373705	TRUE
cg19692710	chr11	1	TRUE
cg19702785	chr20	1	TRUE
cg19706682	chr16	0.118149	TRUE
cg19722847	chr12	0.384009	TRUE
cg19724470	chr9	0.087806	TRUE
cg19731122	chr17	0.493962	TRUE
cg19761273	chr17	0.240774	TRUE
cg19789753	chr2	0.277102	TRUE
cg19853760	chr22	0	TRUE
cg19859445	chr8	0.925275	TRUE
cg19883905	chr18	0.382646	TRUE
cg19935065	chr10	1	TRUE
cg19945840	chr1	0	TRUE
cg20050761	chr7	0.934932	TRUE
cg20052760	chr6	0.511387	TRUE
cg20063906	chr11	0.622374	TRUE
cg20066677	chr12	0.380787	TRUE
cg20090497	chr12	1	TRUE
cg20100381	chr16	0.04496	TRUE
cg20102280	chr13	0	TRUE
cg20149168	chr1	1	TRUE
cg20162159	chr3	0	TRUE
cg20173259	chr19	0.0540411	TRUE
cg20234170	chr11	0	TRUE
cg20240860	chr11	0.135744	TRUE
cg20264732	chr16	0	TRUE
cg20283670	chr10	0.856366	TRUE
cg20295671	chr22	0	TRUE
cg20305610	chr4	0	TRUE
cg20322193	chr7	0.552082	TRUE
cg20324262	chr19	0.409961	TRUE
cg20366832	chr17	0.723225	TRUE
cg20397034	chr7	0.00416996	TRUE
cg20404336	chr12	0.365067	TRUE
cg20420249	chr1	0.341531	TRUE
cg20426994	chr7	0	TRUE
cg20492933	chr5	0.217767	TRUE
cg20492951	chr11	0	TRUE
cg20515136	chr3	0.295113	TRUE
cg20524216	chr3	0	TRUE
cg20525917	chr20	0.240552	TRUE
cg20540209	chr15	0.00450796	TRUE
cg20550118	chr15	0	TRUE
cg20570279	chr11	0.239204	TRUE
cg20572838	chr17	0.326374	TRUE
cg20592391	chr15	0.887906	TRUE
cg20652640	chr16	1	TRUE
cg20654468	chr11	0.527296	TRUE
cg20665157	chr7	1	TRUE
cg20669012	chr3	0.479658	TRUE
cg20674577	chr20	0.601222	TRUE
cg20692569	chr7	0.0865306	TRUE
cg20704560	chr1	0.292519	TRUE
cg20755989	chr5	1	TRUE
cg20756600	chr21	0.743801	TRUE
cg20761322	chr15	0.0598732	TRUE
cg20795863	chr2	0.369316	TRUE
cg20822990	chr1	0	TRUE
cg20828084	chr15	0.57393	TRUE
cg20847090	chr1	1	TRUE
cg20891917	chr7	0.988977	TRUE
cg20897936	chr6	0.375833	TRUE
cg20914508	chr3	1	TRUE
cg20947775	chr4	0.0568134	TRUE
cg20960181	chr1	0.690076	TRUE
cg20964423	chr1	0.7619	TRUE
cg20967028	chr12	0.80968	TRUE
cg20988565	chr8	0.729531	TRUE
cg20999813	chr16	0	TRUE
cg21006686	chr12	0.275423	TRUE
cg21053529	chr15	0	TRUE
cg21072934	chr15	0	TRUE
cg21081971	chr13	0.392277	TRUE
cg21096399	chr11	0.783578	TRUE
cg21099326	chr8	0	TRUE
cg21116457	chr18	0.167994	TRUE
cg21120249	chr9	0	TRUE
cg21137706	chr12	0.38083	TRUE
cg21139312	chr17	0.156804	TRUE
cg21144928	chr1	0	TRUE
cg21159778	chr9	0	TRUE
cg21184495	chr17	0	TRUE
cg21184711	chr7	1	TRUE
cg21186299	chr7	0	TRUE
cg21200703	chr4	0.792734	TRUE
cg21201109	chr19	0.176196	TRUE
cg21205978	chr22	0.395356	TRUE
cg21207418	chr19	0.797263	TRUE
cg21211748	chr1	0.269986	TRUE
cg21251970	chr9	1	TRUE
cg21254939	chr4	0.382744	TRUE
cg21296230	chr15	0	TRUE
cg21305265	chr8	0	TRUE
cg21363706	chr8	0	FALSE
cg21370143	chr11	0.81417	TRUE
cg21378206	chr2	0.947579	TRUE
cg21395782	chr19	0.0106597	TRUE
cg21448423	chr1	0	TRUE
cg21460081	chr17	0	TRUE
cg21467614	chr6	0.622627	TRUE
cg21515349	chr17	0	TRUE
cg21515406	chr5	0.0873193	TRUE
cg21563471	chr2	0.81589	TRUE
cg21567504	chr15	0	TRUE
cg21572722	chr6	0.362771	TRUE
cg21631428	chr4	0.849609	TRUE
cg21649520	chr8	1	TRUE
cg21674704	chr8	0.14549	TRUE
cg21712685	chr6	0.0770664	TRUE
cg21743182	chr7	0.433306	TRUE
cg21747310	chr12	0.676255	TRUE
cg21762589	chr10	0.621219	TRUE
cg21788470	chr12	0	FALSE
cg21801378	chr15	0	TRUE
cg21809447	chr1	0.64534	TRUE
cg21815258	chr5	0.644807	TRUE
cg21835643	chr20	1	TRUE
cg21860825	chr12	1	TRUE
cg21867345	chr3	0.230596	TRUE
cg21870884	chr1	0	TRUE
cg21874213	chr5	0.827558	TRUE
cg21878650	chr5	1	TRUE
cg21899500	chr3	0.0638279	TRUE
cg21907579	chr12	0.470092	TRUE
cg21911021	chr19	0	TRUE
cg21926612	chr6	0.24672	TRUE
cg21940708	chr19	0.74054	TRUE
cg21944491	chr19	0	TRUE
cg21949781	chr18	0.128541	TRUE
cg21950518	chr5	0	TRUE
cg21992250	chr11	0.0291147	TRUE
cg21993406	chr5	0.36055	TRUE
cg22006386	chr19	0	TRUE
cg22016779	chr2	0.558507	TRUE
cg22061831	chr2	0	TRUE
cg22073802	chr9	0	TRUE
cg22090592	chr14	0.503088	TRUE
cg22112832	chr2	0.728233	TRUE
cg22156456	chr17	0.476431	TRUE
cg22158769	chr2	0.0291147	TRUE
cg22162281	chr2	0.0337375	TRUE
cg22171829	chr7	0.325939	TRUE
cg22179082	chr13	0.0813565	TRUE
cg22185977	chr5	0.409743	TRUE
cg22190114	chr19	1	TRUE
cg22194129	chr12	1	TRUE
cg22197050	chr2	0	TRUE
cg22197830	chr5	0.054627	TRUE
cg22213242	chr11	0.916969	TRUE
cg22264409	chr3	0.654948	TRUE
cg22281505	chr17	1	TRUE
cg22282410	chr7	0	TRUE
cg22282672	chr5	0.70845	TRUE
cg22285878	chr7	0	TRUE
cg22289837	chr8	0.658477	TRUE
cg22296808	chr11	0.371699	TRUE
cg22352234	chr6	1	TRUE
cg22358580	chr12	0.0211279	TRUE
cg22372849	chr7	0.24643	TRUE
cg22378065	chr6	1	TRUE
cg22395019	chr2	0.25676	TRUE
cg22396353	chr22	0.0408589	TRUE
cg22407458	chr6	0.340215	TRUE
cg22432269	chr15	0.0352664	TRUE
cg22449114	chr20	0.134013	TRUE
cg22452230	chr15	0.401019	TRUE
cg22454769	chr2	0.247722	TRUE
cg22473095	chr20	0.463592	TRUE
cg22484793	chr3	1	TRUE
cg22495124	chr17	1	TRUE
cg22507023	chr17	0.721938	TRUE
cg22511262	chr11	0	TRUE
cg22512531	chr11	1	TRUE
cg22512670	chr1	0.407497	TRUE
cg22517995	chr19	0.161669	TRUE
cg22568540	chr19	1	TRUE
cg22580353	chr19	0.177616	TRUE
cg22580512	chr12	0	TRUE
cg22582569	chr11	0.0839322	TRUE
cg22594309	chr1	0	TRUE
cg22613010	chr3	0.174934	TRUE
cg22637507	chr11	0.220606	TRUE
cg22679120	chr7	0.194625	TRUE
cg22682373	chr12	0.21547	TRUE
cg22708738	chr19	0.287142	TRUE
cg22736354	chr6	0	TRUE
cg22793142	chr1	1	TRUE
cg22796704	chr10	0.587567	TRUE
cg22809047	chr2	0.350564	TRUE
cg22827210	chr12	0.535449	TRUE
cg22843803	chr11	0.0530581	TRUE
cg22851420	chr1	0	TRUE
cg22864500	chr2	1	TRUE
cg22881141	chr22	0.880514	TRUE
cg22901840	chr1	1	TRUE
cg22919728	chr3	0.414472	TRUE
cg22920873	chr7	0	TRUE
cg22943590	chr2	1	TRUE
cg22947000	chr16	0.416413	TRUE
cg22971191	chr13	1	TRUE
cg22982767	chr22	0	TRUE
cg22983092	chr17	1	TRUE
cg22991148	chr21	0	TRUE
cg23008153	chr5	0.321729	TRUE
cg23028740	chr1	0.412996	TRUE
cg23045908	chr1	0.0891458	TRUE
cg23077820	chr2	0.122909	TRUE
cg23078123	chr1	0.733247	TRUE
cg23091758	chr11	0	TRUE
cg23092072	chr4	0.257328	TRUE
cg23097079	chr10	0.44016	TRUE
cg23124451	chr22	0.0608934	TRUE
cg23127998	chr20	0.686468	TRUE
cg23152772	chr9	0.392838	TRUE
cg23159337	chr3	1	TRUE
cg23159704	chr20	0.528601	TRUE
cg23173910	chr2	0.653266	TRUE
cg23174607	chr6	0.723486	TRUE
cg23180365	chr3	0	TRUE
cg23191950	chr15	0.952008	TRUE
cg23213217	chr1	0.330445	TRUE
cg23234999	chr15	1	TRUE
cg23239039	chr4	0	TRUE
cg23239150	chr4	1	TRUE
cg23320649	chr3	0.268888	TRUE
cg23338195	chr8	1	TRUE
cg23357533	chr13	0.690182	TRUE
cg23357854	chr16	0	TRUE
cg23361092	chr13	0.0537215	TRUE
cg23373640	chr14	0.820069	TRUE
cg23375552	chr6	0	TRUE
cg23376526	chr1	0	TRUE
cg23389651	chr13	1	TRUE
cg23398076	chr2	0.43494	TRUE
cg23460961	chr11	0.5194	TRUE
cg23462687	chr2	0.238821	TRUE
cg23500537	chr5	0.276948	TRUE
cg23510258	chr17	1	TRUE
cg23510764	chr5	0.740092	TRUE
cg23517605	chr6	0	TRUE
cg23538901	chr15	0.823602	TRUE
cg23552977	chr14	0	TRUE
cg23568913	chr22	0.265235	TRUE
cg23586440	chr20	0.8203	TRUE
cg23605843	chr1	0	TRUE
cg23606718	chr2	0	TRUE
cg23615741	chr10	0.235663	TRUE
cg23643435	chr2	0.116461	TRUE
cg23662675	chr20	0	TRUE
cg23668631	chr17	0.213468	TRUE
cg23679724	chr20	0	TRUE
cg23709172	chr14	0.114575	TRUE
cg23710218	chr8	0	TRUE
cg23712970	chr14	0.843868	TRUE
cg23718736	chr18	0.245961	TRUE
cg23731991	chr7	0.0179245	TRUE
cg23744638	chr11	0.720402	TRUE
cg23753748	chr10	0.444738	TRUE
cg23754392	chr10	0.191224	TRUE
cg23786576	chr1	0.77449	TRUE
cg23808301	chr17	0.173788	TRUE
cg23818978	chr11	1	TRUE
cg23829395	chr12	0.720397	TRUE
cg23832061	chr6	0	TRUE
cg23836737	chr4	1	TRUE
cg23857078	chr7	0.938184	TRUE
cg23858532	chr4	0	TRUE
cg23889772	chr19	0.55695	TRUE
cg23900712	chr15	0.554479	TRUE
cg23941599	chr5	0.257721	TRUE
cg23995914	chr4	0.236595	TRUE
cg24046474	chr9	0.396166	TRUE
cg24058132	chr14	0.476673	TRUE
cg24079702	chr2	0.247722	TRUE
cg24081819	chr8	0.188219	TRUE
cg24090911	chr5	0.151249	TRUE
cg24091819	chr12	0.906882	TRUE
cg24107728	chr1	0.186992	TRUE
cg24110063	chr16	0.0585789	TRUE
cg24116886	chr20	0.682665	TRUE
cg24125648	chr15	0.298343	TRUE
cg24126851	chr11	0.823437	TRUE
cg24150153	chr1	0	TRUE
cg24169822	chr7	0.243117	TRUE
cg24173182	chr17	0.427244	TRUE
cg24178740	chr2	0.104322	TRUE
cg24208206	chr3	0.0668136	TRUE
cg24217948	chr18	0	TRUE
cg24254120	chr13	0	TRUE
cg24262469	chr3	0.316225	TRUE
cg24304712	chr1	0	TRUE
cg24332433	chr17	0	TRUE
cg24349631	chr22	0.0352664	TRUE
cg24350475	chr10	0.708836	TRUE
cg24374161	chr11	0.552567	TRUE
cg24375409	chr1	0.109361	TRUE
cg24403644	chr20	0.928132	TRUE
cg24407308	chr11	0.107673	TRUE
cg24441922	chr2	0.512288	TRUE
cg24450312	chr1	0	TRUE
cg24471894	chr9	0.381541	TRUE
cg24493940	chr12	0	TRUE
cg24505122	chr12	0.757513	TRUE
cg24505341	chr3	0	TRUE
cg24550456	chr1	0.238667	TRUE
cg24556026	chr9	0	TRUE
cg24580001	chr11	0.737193	TRUE
cg24611351	chr2	0.37835	TRUE
cg24620508	chr21	1	TRUE
cg24651706	chr2	0	TRUE
cg24674703	chr11	0.634913	TRUE
cg24696028	chr19	0	TRUE
cg24711649	chr12	0.59565	TRUE
cg24713204	chr19	0	TRUE
cg24739596	chr1	1	TRUE
cg24745327	chr11	0	TRUE
cg24768561	chr2	0.252599	TRUE
cg24788483	chr10	0.564452	TRUE
cg24834740	chr20	0	TRUE
cg24838825	chr10	0	FALSE
cg24843443	chr4	0.340193	TRUE
cg24845578	chr5	0.216544	TRUE
cg24862131	chr7	1	TRUE
cg24881205	chr7	0	TRUE
cg24883498	chr19	0.00655853	TRUE
cg24888049	chr15	0	TRUE
cg24888989	chr3	0	TRUE
cg24891133	chr13	0.368473	TRUE
cg24899750	chr20	0.424969	TRUE
cg24921089	chr11	0.653403	TRUE
cg24987259	chr11	0.259098	TRUE
cg24996883	chr1	1	TRUE
cg25005357	chr15	1	TRUE
cg25022327	chr11	1	TRUE
cg25062539	chr8	0.328169	TRUE
cg25070637	chr8	0.459998	TRUE
cg25092328	chr20	0.0449733	TRUE
cg25101936	chr11	0.423968	TRUE
cg25135555	chr17	0.608399	TRUE
cg25136687	chr6	0	TRUE
cg25148589	chr4	0	TRUE
cg25149218	chr2	0.510719	TRUE
cg25159610	chr5	0.848341	TRUE
cg25166896	chr22	0.127835	TRUE
cg25178749	chr21	1	TRUE
cg25229964	chr1	0.448171	TRUE
cg25251635	chr7	0.0303554	TRUE
cg25256723	chr1	0.757534	TRUE
cg25268718	chr14	0.424541	TRUE
cg25305703	chr8	1	TRUE
cg25309888	chr2	0.127204	TRUE
cg25386151	chr1	0.537901	TRUE
cg25410668	chr1	0.505208	TRUE
cg25411725	chr3	0.485176	TRUE
cg25415508	chr15	0	TRUE
cg25427880	chr10	0	TRUE
cg25428451	chr1	0.383781	TRUE
cg25428494	chr4	0.360166	TRUE
cg25431974	chr2	0.18215	TRUE
cg25436157	chr18	1	TRUE
cg25450819	chr5	1	TRUE
cg25459323	chr22	0.416695	TRUE
cg25478614	chr3	0.14408	TRUE
cg25505610	chr11	0.223344	TRUE
cg25536676	chr1	0.233756	TRUE
cg25538571	chr8	1	TRUE
cg25552492	chr8	0	TRUE
cg25564800	chr3	0.329896	TRUE
cg25618424	chr1	0.69356	TRUE
cg25657834	chr2	0	TRUE
cg25683012	chr12	0	TRUE
cg25713185	chr2	0.174146	TRUE
cg25719851	chr12	0	TRUE
cg25762706	chr8	0.657585	TRUE
cg25769980	chr4	0.83624	TRUE
cg25771195	chr16	0.323887	TRUE
cg25781123	chr3	1	TRUE
cg25809905	chr17	0.678399	TRUE
cg25838150	chr11	0.727187	TRUE
cg25881193	chr6	0.436148	TRUE
cg25898500	chr16	0	TRUE
cg25909396	chr17	0.168176	TRUE
cg25928579	chr17	0	TRUE
cg25936902	chr13	0.164567	TRUE
cg25947945	chr1	0.146027	TRUE
cg25969122	chr11	0.439848	TRUE
cg26003813	chr16	0	TRUE
cg26005082	chr19	0.325586	TRUE
cg26022315	chr17	0	TRUE
cg26043391	chr1	0	TRUE
cg26045434	chr8	0	TRUE
cg26091688	chr16	0.0291447	TRUE
cg26096837	chr11	0.08448	TRUE
cg26101086	chr8	1	TRUE
cg26104204	chr19	0	TRUE
cg26105310	chr1	0.283187	TRUE
cg26109803	chr10	0.694884	TRUE
cg26116103	chr12	0	TRUE
cg26147845	chr12	0	TRUE
cg26158023	chr3	1	TRUE
cg26162695	chr17	0	TRUE
cg26201213	chr10	0.797568	TRUE
cg26212924	chr8	0	TRUE
cg26219051	chr22	0	TRUE
cg26297688	chr12	0.0980241	TRUE
cg26311454	chr12	0.650497	TRUE
cg26312920	chr7	0.728964	TRUE
cg26350286	chr8	0	TRUE
cg26357744	chr3	0	TRUE
cg26372517	chr1	0	TRUE
cg26382071	chr17	0	TRUE
cg26394737	chr14	0.240126	TRUE
cg26394940	chr22	0	TRUE
cg26453588	chr22	0.344235	TRUE
cg26456957	chr19	0	TRUE
cg26469387	chr15	1	TRUE
cg26483332	chr10	0	TRUE
cg26535072	chr9	0.281681	TRUE
cg26552743	chr11	0.573005	TRUE
cg26581729	chr9	0.232121	TRUE
cg26610808	chr10	0.438981	TRUE
cg26614073	chr3	0.0495125	TRUE
cg26620959	chr6	0.423289	TRUE
cg26650655	chr5	0.0243827	TRUE
cg26665419	chr6	0	TRUE
cg26668490	chr17	0	TRUE
cg26685941	chr13	0.0937076	TRUE
cg26711820	chr12	0.319972	TRUE
cg26718511	chr6	0.311259	TRUE
cg26723847	chr11	0.00505624	TRUE
cg26725786	chr8	0.796524	TRUE
cg26746469	chr20	0.584082	TRUE
cg26765385	chr7	0.920709	TRUE
cg26815229	chr1	0.283608	TRUE
cg26824091	chr6	0.174074	TRUE
cg26824216	chr3	0.956814	TRUE
cg26833936	chr1	0.560499	TRUE
cg26842024	chr19	0	TRUE
cg26843711	chr5	0.148953	TRUE
cg26845300	chr6	0.303374	TRUE
cg26866325	chr4	1	TRUE
cg26898166	chr2	0	TRUE
cg26921969	chr5	0.162271	TRUE
cg26925981	chr8	0.782799	TRUE
cg26927807	chr19	0.245915	TRUE
cg26932976	chr17	0	TRUE
cg26933021	chr1	0.708781	TRUE
cg26974444	chr16	1	TRUE
cg26986871	chr12	0.84054	TRUE
cg27009703	chr7	0.580131	TRUE
cg27015931	chr16	0.61201	TRUE
cg27016307	chr19	0.584861	TRUE
cg27021512	chr13	0.434422	TRUE
cg27059819	chr3	0.175874	TRUE
cg27061971	chr5	0.0401046	TRUE
cg27092035	chr5	0	TRUE
cg27131176	chr22	0.0352664	TRUE
cg27168858	chr1	0.843469	TRUE
cg27169020	chr15	0.625243	TRUE
cg27187881	chr22	0	TRUE
cg27202708	chr1	0.497504	TRUE
cg27212234	chr19	0	TRUE
cg27244482	chr5	1	TRUE
cg27319898	chr7	0	TRUE
cg27320127	chr2	0	TRUE
cg27338353	chr22	0	TRUE
cg27367526	chr7	0.0540834	TRUE
cg27367952	chr2	0.688587	TRUE
cg27377450	chr19	0.525937	TRUE
cg27386529	chr3	0.00850117	TRUE
cg27396655	chr22	0.104355	TRUE
cg27413543	chr4	0	TRUE
cg27430293	chr16	0.234464	TRUE
cg27432653	chr1	0.00231093	TRUE
cg27437510	chr7	0.943475	TRUE
cg27440834	chr3	0.269683	TRUE
cg27447740	chr20	0	TRUE
cg27455578	chr7	0.490674	TRUE
cg27493997	chr1	0	TRUE
cg27494383	chr15	0	TRUE
cg27508620	chr7	0.0870077	TRUE
cg27514224	chr9	0.630205	TRUE
cg27544190	chr21	0	TRUE
cg27553955	chr2	0.184665	TRUE
cg27597505	chr12	0.573934	TRUE
cg27619353	chr22	0	FALSE
cg27626102	chr7	0.336976	TRUE
cg27640528	chr5	0.675745	TRUE
cg27655905	chr11	0.0972228	TRUE
ch.13.39564907R	chr13	0	FALSE
ch.2.30415474F	chr2	0	FALSE

## Sheet: Neandertal (PC-guided Clocks)
Table S6: Methylation values of target sites extracted from archaic hominin DNAm maps
Site	Chromosome	Beta Value	Matched
cg00000292	chr16	0.136675	TRUE
cg00000714	chr19	0.088846	TRUE
cg00001099	chr8	0.395871	TRUE
cg00001446	chr1	0.279036	TRUE
cg00001747	chr2	0	TRUE
cg00002116	chr17	0	TRUE
cg00002224	chr8	0	TRUE
cg00002426	chr3	0.0136299	TRUE
cg00002646	chr1	0.576693	TRUE
cg00002660	chr12	0	TRUE
cg00002719	chr1	0.140335	TRUE
cg00002810	chr1	0	TRUE
cg00003091	chr4	0.244135	TRUE
cg00003287	chr1	0.360213	TRUE
cg00003345	chr1	0.610249	TRUE
cg00003529	chr3	1	TRUE
cg00003578	chr1	0.481295	TRUE
cg00003625	chr17	0	TRUE
cg00003994	chr7	0	TRUE
cg00004429	chr9	0.808618	TRUE
cg00004608	chr6	0.345642	TRUE
cg00004806	chr6	0.989841	TRUE
cg00005072	chr16	1	TRUE
cg00005306	chr16	0	TRUE
cg00005619	chr11	0.307078	TRUE
cg00005849	chr2	0.733783	TRUE
cg00006081	chr10	0.139816	TRUE
cg00006459	chr4	1	TRUE
cg00007076	chr8	0.0890569	TRUE
cg00007221	chr1	0.638372	TRUE
cg00007981	chr11	0	TRUE
cg00008629	chr9	0.207882	TRUE
cg00008647	chr1	0	TRUE
cg00008665	chr3	0.5076	TRUE
cg00008695	chr8	0.628455	TRUE
cg00008713	chr18	0	TRUE
cg00009407	chr14	0	TRUE
cg00010654	chr1	0.422181	TRUE
cg00010853	chr6	0.259452	TRUE
cg00011203	chr1	0.84469	TRUE
cg00011225	chr2	0.0582276	TRUE
cg00011482	chr14	0.53759	TRUE
cg00011740	chr16	0	TRUE
cg00011861	chr14	0.738077	TRUE
cg00011924	chr17	0.663142	TRUE
cg00012199	chr14	0	TRUE
cg00012362	chr1	0	TRUE
cg00012386	chr1	0.107883	TRUE
cg00012397	chr11	0	TRUE
cg00012469	chr7	0.0105728	TRUE
cg00013410	chr17	0	TRUE
cg00013618	chr22	0.74255	TRUE
cg00013899	chr1	1	TRUE
cg00014085	chr2	0	TRUE
cg00014118	chr1	0.579511	TRUE
cg00014194	chr9	0.172234	TRUE
cg00014272	chr19	0.0922739	TRUE
cg00015121	chr14	0.521827	TRUE
cg00015603	chr2	1	TRUE
cg00015770	chr4	0	TRUE
cg00016223	chr6	0	TRUE
cg00016783	chr2	0.660973	TRUE
cg00016913	chr17	0.617904	TRUE
cg00017441	chr19	0	TRUE
cg00017826	chr2	0.93289	TRUE
cg00017842	chr2	0.823246	TRUE
cg00017931	chr6	0.695384	TRUE
cg00018606	chr2	0.372077	TRUE
cg00019118	chr12	0.893724	TRUE
cg00019137	chr19	0	TRUE
cg00019759	chr1	0	TRUE
cg00020348	chr7	0.984803	TRUE
cg00020474	chr1	0.33735	TRUE
cg00021030	chr17	1	TRUE
cg00021123	chr1	0	FALSE
cg00021237	chr8	0	TRUE
cg00021275	chr2	0.49863	TRUE
cg00021325	chr14	0.075767	TRUE
cg00021527	chr17	0	TRUE
cg00021855	chr8	0.452137	TRUE
cg00022235	chr16	0.754847	TRUE
cg00022866	chr11	0.408481	TRUE
cg00022911	chr19	0	TRUE
cg00023001	chr17	0	TRUE
cg00024046	chr2	1	TRUE
cg00024086	chr7	0	TRUE
cg00024404	chr5	0.229214	TRUE
cg00024416	chr22	1	TRUE
cg00024471	chr3	0.149274	TRUE
cg00024472	chr17	0	TRUE
cg00024812	chr2	0.192517	TRUE
cg00024967	chr3	0	TRUE
cg00024989	chr19	0.606787	TRUE
cg00025138	chr14	0	TRUE
cg00025211	chr1	0	TRUE
cg00025405	chr5	0.424845	TRUE
cg00025591	chr21	0.328717	TRUE
cg00025626	chr2	1	TRUE
cg00025991	chr10	0.992899	TRUE
cg00026290	chr4	1	TRUE
cg00026412	chr10	1	TRUE
cg00026474	chr8	0.329336	TRUE
cg00026909	chr1	0.699431	TRUE
cg00027083	chr18	0.115542	TRUE
cg00027466	chr1	0.96945	TRUE
cg00027674	chr11	0.218409	TRUE
cg00028022	chr1	0.81954	TRUE
cg00028135	chr3	0.00796429	TRUE
cg00028184	chr1	0.425802	TRUE
cg00028507	chr1	0.554097	TRUE
cg00028935	chr3	0	TRUE
cg00029246	chr7	1	TRUE
cg00029353	chr12	0	TRUE
cg00029397	chr12	0.152783	TRUE
cg00029521	chr6	0.849429	TRUE
cg00030047	chr1	0.573704	TRUE
cg00030604	chr1	0.55746	TRUE
cg00030816	chr1	0	TRUE
cg00031162	chr17	0.34253	TRUE
cg00031256	chr6	0.0965066	TRUE
cg00031277	chr4	1	TRUE
cg00031708	chr7	0.570734	TRUE
cg00031896	chr12	0.502839	TRUE
cg00032227	chr17	0	TRUE
cg00032609	chr20	0.307434	TRUE
cg00032756	chr12	0.413443	TRUE
cg00033155	chr2	1	TRUE
cg00033773	chr19	0	TRUE
cg00033834	chr10	1	TRUE
cg00034019	chr6	0	TRUE
cg00034039	chr9	0	TRUE
cg00034769	chr14	0.325098	TRUE
cg00035197	chr16	1	TRUE
cg00035623	chr19	0.4985	TRUE
cg00035636	chr13	0.383565	TRUE
cg00035969	chr1	0.943416	TRUE
cg00036011	chr6	0	TRUE
cg00036110	chr1	0.784742	TRUE
cg00036347	chr1	0.0677246	TRUE
cg00036871	chr2	0.293524	TRUE
cg00036976	chr16	0.324825	TRUE
cg00037388	chr2	0	TRUE
cg00038167	chr19	0.525816	TRUE
cg00038675	chr1	0.804409	TRUE
cg00038736	chr19	0.0346787	TRUE
cg00039057	chr22	0.363065	TRUE
cg00039129	chr6	0.705616	TRUE
cg00039480	chr17	0.764557	TRUE
cg00039864	chr5	1	TRUE
cg00040008	chr4	0.119903	TRUE
cg00040367	chr1	0	TRUE
cg00040575	chr22	0.447925	TRUE
cg00040708	chr3	0.331058	TRUE
cg00040861	chr19	0	TRUE
cg00040873	chr16	1	TRUE
cg00041328	chr17	0.224871	TRUE
cg00041575	chr11	0.118782	TRUE
cg00041872	chr1	0.539933	TRUE
cg00041989	chr17	0.731357	TRUE
cg00042059	chr2	1	TRUE
cg00042341	chr2	0	TRUE
cg00042914	chr18	0.770711	TRUE
cg00043095	chr2	0	TRUE
cg00043364	chr5	0	TRUE
cg00043564	chr7	0.243197	TRUE
cg00043599	chr1	0	TRUE
cg00043788	chr20	0.210153	TRUE
cg00044050	chr16	0	TRUE
cg00044245	chr6	0	TRUE
cg00044372	chr16	1	TRUE
cg00044665	chr16	0.870889	TRUE
cg00044729	chr22	0.823266	TRUE
cg00045114	chr1	1	TRUE
cg00045275	chr1	0.313814	TRUE
cg00045900	chr8	1	TRUE
cg00045902	chr10	0.323246	TRUE
cg00045910	chr10	1	TRUE
cg00046041	chr16	0	TRUE
cg00046156	chr5	1	TRUE
cg00046744	chr12	0.000499835	TRUE
cg00046815	chr12	0.337788	TRUE
cg00047287	chr22	0.146821	TRUE
cg00047469	chr9	0.00361245	TRUE
cg00047694	chr16	0.142229	TRUE
cg00048759	chr7	0	TRUE
cg00049323	chr5	0.171528	TRUE
cg00049440	chr9	0	TRUE
cg00049595	chr6	0.0445219	TRUE
cg00049729	chr5	0.353042	TRUE
cg00050152	chr5	0	TRUE
cg00050375	chr6	0.947495	TRUE
cg00050792	chr13	0.229599	TRUE
cg00051662	chr10	0.861342	TRUE
cg00051782	chr3	0	TRUE
cg00052290	chr10	0	TRUE
cg00052422	chr3	0.0378767	TRUE
cg00053851	chr1	0.52963	TRUE
cg00054301	chr16	1	TRUE
cg00054706	chr2	0.302134	TRUE
cg00054774	chr21	0.458512	TRUE
cg00055073	chr2	0.632263	TRUE
cg00055292	chr7	0.559338	TRUE
cg00055341	chr2	0.700202	TRUE
cg00055529	chr17	0.805558	TRUE
cg00055555	chr10	0.369395	TRUE
cg00055557	chr20	0.179427	TRUE
cg00056202	chr8	0.247377	TRUE
cg00056257	chr3	0.222537	TRUE
cg00056497	chr10	0.145453	TRUE
cg00056624	chr3	0	TRUE
cg00056628	chr17	0	TRUE
cg00056676	chr5	0	TRUE
cg00056767	chr13	0.353762	TRUE
cg00057393	chr15	0	TRUE
cg00057593	chr8	1	TRUE
cg00057700	chr10	0	TRUE
cg00057722	chr18	0.324495	TRUE
cg00058009	chr4	0.633382	TRUE
cg00058515	chr2	0.581538	TRUE
cg00058708	chr2	0.0105199	TRUE
cg00058879	chr22	0.287362	TRUE
cg00058938	chr19	0.225574	TRUE
cg00059225	chr5	0	TRUE
cg00059424	chr22	0	TRUE
cg00059652	chr17	0.590886	TRUE
cg00059740	chr7	0	TRUE
cg00059911	chr12	0	TRUE
cg00060320	chr3	0	TRUE
cg00060374	chr1	0.0682992	TRUE
cg00060836	chr8	0.11942	TRUE
cg00060880	chr12	0	TRUE
cg00061306	chr17	0.643861	TRUE
cg00061635	chr17	0.739874	TRUE
cg00061860	chr15	0.872945	TRUE
cg00062245	chr17	0	TRUE
cg00062282	chr22	0	TRUE
cg00062312	chr1	0	TRUE
cg00063111	chr3	0.207966	TRUE
cg00063174	chr2	0.0139936	TRUE
cg00063456	chr1	0.67986	TRUE
cg00063567	chr2	0	TRUE
cg00064950	chr17	0.149152	TRUE
cg00065302	chr21	0.225672	TRUE
cg00065408	chr12	0	TRUE
cg00065957	chr1	0.40114	TRUE
cg00066239	chr17	0.125959	TRUE
cg00066663	chr17	0.297707	TRUE
cg00066816	chr5	0.15436	TRUE
cg00067018	chr12	0	TRUE
cg00067102	chr1	0	TRUE
cg00067126	chr2	0.307463	TRUE
cg00067471	chr19	0.206081	TRUE
cg00067518	chr1	0.285063	TRUE
cg00067528	chr2	0.367465	TRUE
cg00067758	chr6	1	TRUE
cg00068102	chr2	0.89602	TRUE
cg00068433	chr1	0.171568	TRUE
cg00069002	chr1	0	TRUE
cg00069261	chr16	0	TRUE
cg00070052	chr9	0.387476	TRUE
cg00070162	chr1	1	TRUE
cg00070680	chr7	0	TRUE
cg00070814	chr10	0	TRUE
cg00071265	chr20	0.161864	TRUE
cg00071360	chr20	0.187664	TRUE
cg00071442	chr14	0.394424	TRUE
cg00071751	chr10	0	TRUE
cg00071887	chr15	0.300236	TRUE
cg00071950	chr4	0	TRUE
cg00071998	chr6	0	TRUE
cg00072216	chr4	0	TRUE
cg00072369	chr5	0.420802	TRUE
cg00072426	chr16	0.901594	TRUE
cg00073010	chr17	0	TRUE
cg00073090	chr19	0.310163	TRUE
cg00073460	chr6	0.409711	TRUE
cg00073549	chr16	0.948176	TRUE
cg00073794	chr2	0.779258	TRUE
cg00074365	chr2	1	TRUE
cg00074818	chr8	0.630773	TRUE
cg00076325	chr2	0.233087	TRUE
cg00076543	chr6	0.565486	TRUE
cg00076645	chr5	0	TRUE
cg00076998	chr3	0	TRUE
cg00077877	chr8	1	TRUE
cg00077904	chr5	0.544761	TRUE
cg00078025	chr9	0.0326851	TRUE
cg00078194	chr11	0	TRUE
cg00078911	chr2	0.902721	TRUE
cg00078968	chr1	0	TRUE
cg00079219	chr12	1	TRUE
cg00079563	chr22	0	TRUE
cg00079598	chr11	1	TRUE
cg00080012	chr11	0	TRUE
cg00080972	chr5	0.0375525	TRUE
cg00080987	chr3	0.680459	TRUE
cg00081105	chr3	1	TRUE
cg00081251	chr1	0	TRUE
cg00081439	chr10	1	TRUE
cg00081919	chr2	0.352964	TRUE
cg00081935	chr12	0	TRUE
cg00081975	chr17	0	TRUE
cg00082140	chr5	0.776096	TRUE
cg00082182	chr1	0.258439	TRUE
cg00082285	chr1	0.9961	TRUE
cg00082426	chr2	0	TRUE
cg00082713	chr3	0.0942715	TRUE
cg00082897	chr22	0.557329	TRUE
cg00082939	chr10	1	TRUE
cg00083188	chr10	0.323173	TRUE
cg00083193	chr15	0.711904	TRUE
cg00083206	chr6	0.879309	TRUE
cg00083262	chr1	0.248737	TRUE
cg00083359	chr8	1	TRUE
cg00083616	chr19	1	TRUE
cg00083659	chr22	1	TRUE
cg00084019	chr7	0.922151	TRUE
cg00084202	chr8	0.67071	TRUE
cg00084347	chr12	0.747894	TRUE
cg00084432	chr13	0.788782	TRUE
cg00084687	chr7	0	TRUE
cg00085013	chr3	1	TRUE
cg00085281	chr7	0.77968	TRUE
cg00085370	chr5	1	TRUE
cg00085493	chr1	1	TRUE
cg00086283	chr7	1	TRUE
cg00086809	chr16	0	TRUE
cg00087067	chr5	0.650712	TRUE
cg00087244	chr7	0.440108	TRUE
cg00087273	chr1	1	TRUE
cg00087884	chr1	0.357936	TRUE
cg00087963	chr16	0.546958	TRUE
cg00087971	chr6	0.084856	TRUE
cg00088148	chr2	0.777737	TRUE
cg00088183	chr1	0.176186	TRUE
cg00088299	chr4	0.115542	TRUE
cg00088797	chr3	0.386415	TRUE
cg00089486	chr3	0.356902	TRUE
cg00089528	chr5	0.253465	TRUE
cg00089550	chr11	0	TRUE
cg00089821	chr6	0.912328	TRUE
cg00089823	chr5	0.453904	TRUE
cg00089915	chr1	0.0945269	TRUE
cg00090431	chr2	0.102665	TRUE
cg00090674	chr22	0.762518	TRUE
cg00090737	chr10	0.702047	TRUE
cg00090787	chr15	0.321717	TRUE
cg00090936	chr3	0.667692	TRUE
cg00091004	chr1	0.0587487	TRUE
cg00091060	chr19	0.730008	TRUE
cg00091693	chr17	1	TRUE
cg00092400	chr12	0.843055	TRUE
cg00093095	chr17	0.648842	TRUE
cg00093099	chr18	0.659344	TRUE
cg00094036	chr12	0	TRUE
cg00094063	chr16	0.0688023	TRUE
cg00094412	chr6	0.639516	TRUE
cg00094518	chr7	0	TRUE
cg00094735	chr5	0.542336	TRUE
cg00094851	chr2	0.145286	TRUE
cg00094898	chr16	0.231912	TRUE
cg00095259	chr18	1	TRUE
cg00095276	chr5	0.747983	TRUE
cg00095431	chr2	1	TRUE
cg00095523	chr12	0.581212	TRUE
cg00095526	chr1	0.827458	TRUE
cg00095674	chr1	0	TRUE
cg00096536	chr4	0.136111	TRUE
cg00096810	chr5	1	TRUE
cg00096922	chr7	0	TRUE
cg00097450	chr17	0.772075	TRUE
cg00097452	chr1	0.450326	TRUE
cg00097573	chr1	0	TRUE
cg00097968	chr1	1	TRUE
cg00098304	chr15	0.931877	TRUE
cg00098553	chr13	0	TRUE
cg00098814	chr15	0	TRUE
cg00099094	chr5	0.481925	TRUE
cg00099240	chr22	0.320224	TRUE
cg00099441	chr2	0.679454	TRUE
cg00099602	chr6	1	TRUE
cg00099835	chr2	0.104836	TRUE
cg00099976	chr13	0	TRUE
cg00100804	chr9	0	TRUE
cg00101154	chr16	0.392421	TRUE
cg00101453	chr22	0	TRUE
cg00101457	chr10	0.886896	TRUE
cg00101629	chr1	1	TRUE
cg00101715	chr3	0.756409	TRUE
cg00101728	chr6	0.667327	TRUE
cg00101940	chr16	0.923601	TRUE
cg00102023	chr18	0	TRUE
cg00102166	chr1	0	TRUE
cg00102615	chr9	0.941704	TRUE
cg00102731	chr20	0.515606	TRUE
cg00102920	chr6	0.251727	TRUE
cg00102955	chr1	0.100715	TRUE
cg00103299	chr15	0.12041	TRUE
cg00103398	chr1	0.554566	TRUE
cg00103448	chr17	1	TRUE
cg00103783	chr17	0	TRUE
cg00103785	chr1	0.324406	TRUE
cg00104267	chr9	0.210859	TRUE
cg00105253	chr14	0.478631	TRUE
cg00105640	chr1	0.0836129	TRUE
cg00106250	chr2	0	TRUE
cg00106499	chr7	0	TRUE
cg00106744	chr21	0	TRUE
cg00107046	chr1	1	TRUE
cg00107187	chr14	0.0897511	TRUE
cg00107488	chr22	0.222868	TRUE
cg00107606	chr2	0.0335967	TRUE
cg00107630	chr9	0.961065	TRUE
cg00107632	chr4	0	TRUE
cg00107682	chr15	0.379432	TRUE
cg00107782	chr1	0	TRUE
cg00108098	chr3	1	TRUE
cg00108277	chr3	0	TRUE
cg00108454	chr1	0.58173	TRUE
cg00108715	chr3	0.841812	TRUE
cg00108873	chr9	0.754384	TRUE
cg00109356	chr13	0	TRUE
cg00109703	chr20	0.308586	TRUE
cg00110578	chr6	0	TRUE
cg00110675	chr6	0	TRUE
cg00110688	chr12	0	TRUE
cg00110785	chr7	0.331809	TRUE
cg00110832	chr6	0	TRUE
cg00110917	chr7	0.687941	TRUE
cg00110982	chr7	0	TRUE
cg00111826	chr5	0.778945	TRUE
cg00111893	chr6	0.182326	TRUE
cg00111948	chr1	0.243149	TRUE
cg00112238	chr1	1	TRUE
cg00112251	chr1	0.457849	TRUE
cg00112341	chr3	1	TRUE
cg00112517	chr17	0.0390789	TRUE
cg00112952	chr1	1	TRUE
cg00113315	chr1	1	TRUE
cg00113663	chr5	0.0362633	TRUE
cg00113951	chr12	0.246909	TRUE
cg00114008	chr1	0	TRUE
cg00114346	chr7	0.987339	TRUE
cg00114478	chr8	0.81493	TRUE
cg00114944	chr6	0	TRUE
cg00114966	chr1	0.773531	TRUE
cg00115458	chr6	0.606818	TRUE
cg00115567	chr6	0.641892	TRUE
cg00115629	chr3	0.14388	TRUE
cg00116092	chr1	0.290824	TRUE
cg00116234	chr9	1	TRUE
cg00116315	chr6	0.889844	TRUE
cg00116766	chr16	1	TRUE
cg00116838	chr19	0	TRUE
cg00116946	chr5	0.328607	TRUE
cg00117005	chr6	0.812573	TRUE
cg00117172	chr1	0	TRUE
cg00117599	chr17	0.799396	TRUE
cg00118158	chr2	1	TRUE
cg00118507	chr1	0.445491	TRUE
cg00118978	chr3	0.237248	TRUE
cg00119073	chr3	0.573691	TRUE
cg00119079	chr3	0.0973404	TRUE
cg00119117	chr20	0	TRUE
cg00119127	chr7	1	TRUE
cg00119314	chr17	0.151746	TRUE
cg00119811	chr5	1	TRUE
cg00120473	chr4	0.494057	TRUE
cg00121158	chr9	0	TRUE
cg00121339	chr16	0.805831	TRUE
cg00121634	chr3	0	TRUE
cg00121640	chr9	0	TRUE
cg00121876	chr6	0.471897	TRUE
cg00122406	chr8	0.495676	TRUE
cg00122659	chr1	0.998316	TRUE
cg00122854	chr2	0.7572	TRUE
cg00123035	chr1	0	TRUE
cg00123055	chr8	0	TRUE
cg00124488	chr6	0	TRUE
cg00125306	chr17	0	TRUE
cg00125406	chr4	0.468242	TRUE
cg00126034	chr17	0	TRUE
cg00126959	chr17	0.0442024	TRUE
cg00127047	chr5	0.301039	TRUE
cg00127150	chr22	0.970465	TRUE
cg00127214	chr14	0	TRUE
cg00127353	chr6	1	TRUE
cg00127408	chr9	0.471858	TRUE
cg00127591	chr17	0	TRUE
cg00127781	chr3	0.858838	TRUE
cg00128386	chr16	0.847001	TRUE
cg00128482	chr8	1	TRUE
cg00128877	chr1	0.602967	TRUE
cg00129273	chr8	0.181779	TRUE
cg00129651	chr17	0.0521974	TRUE
cg00129827	chr6	0.442668	TRUE
cg00129981	chr16	0.833284	TRUE
cg00130039	chr13	0	TRUE
cg00130181	chr13	1	TRUE
cg00130275	chr11	0.143259	TRUE
cg00131758	chr22	1	TRUE
cg00132108	chr5	0.158667	TRUE
cg00132141	chr10	1	TRUE
cg00133403	chr16	1	TRUE
cg00133595	chr16	0	TRUE
cg00133624	chr12	1	TRUE
cg00133698	chr4	0	TRUE
cg00133909	chr15	0	TRUE
cg00134190	chr6	0	TRUE
cg00134210	chr10	0.474892	TRUE
cg00134295	chr12	0.614835	TRUE
cg00134602	chr3	0.569976	TRUE
cg00134645	chr5	0	TRUE
cg00134776	chr3	0.203352	TRUE
cg00134787	chr17	0.717199	TRUE
cg00135056	chr3	0.0729726	TRUE
cg00135293	chr6	1	TRUE
cg00135815	chr13	0	TRUE
cg00135888	chr11	0.195347	TRUE
cg00136405	chr4	1	TRUE
cg00136477	chr1	0.793705	TRUE
cg00136736	chr22	0.324059	TRUE
cg00136968	chr7	1	TRUE
cg00137209	chr3	0.0527576	TRUE
cg00137828	chr10	0	TRUE
cg00138101	chr17	0.788041	TRUE
cg00138126	chr20	0.130498	TRUE
cg00138710	chr2	1	TRUE
cg00139037	chr13	0	TRUE
cg00139244	chr10	0	TRUE
cg00139681	chr7	1	TRUE
cg00139683	chr20	0.464891	TRUE
cg00140447	chr7	1	TRUE
cg00140479	chr22	0	TRUE
cg00140501	chr8	0	TRUE
cg00140842	chr2	0	TRUE
cg00141162	chr3	1	TRUE
cg00141174	chr9	0.34483	TRUE
cg00142257	chr9	0.0464656	TRUE
cg00142266	chr15	0.0863035	TRUE
cg00142670	chr6	0.172609	TRUE
cg00142925	chr11	0	TRUE
cg00143376	chr2	0.895549	TRUE
cg00143387	chr16	0	TRUE
cg00145141	chr17	1	TRUE
cg00145352	chr17	0.689007	TRUE
cg00145904	chr1	0.340562	TRUE
cg00145961	chr15	0.876807	TRUE
cg00146027	chr10	0.522178	TRUE
cg00146695	chr13	0	TRUE
cg00146698	chr4	0	TRUE
cg00147095	chr1	0.268062	TRUE
cg00147172	chr22	0.70001	TRUE
cg00147339	chr6	0	TRUE
cg00147638	chr1	1	TRUE
cg00147863	chr19	0.603215	TRUE
cg00148127	chr17	1	TRUE
cg00148325	chr17	1	TRUE
cg00148666	chr16	0	TRUE
cg00148825	chr4	0.657575	TRUE
cg00149213	chr1	1	TRUE
cg00149976	chr3	0	TRUE
cg00150231	chr2	0.586225	TRUE
cg00150785	chr20	0.765575	TRUE
cg00151251	chr2	0.615215	TRUE
cg00151525	chr1	0.0049773	TRUE
cg00151607	chr16	0	TRUE
cg00151922	chr20	0	TRUE
cg00152047	chr1	1	TRUE
cg00152175	chr16	0.368167	TRUE
cg00152322	chr15	0.365512	TRUE
cg00152799	chr18	0.170889	TRUE
cg00152942	chr16	0.169002	TRUE
cg00152946	chr10	0.169264	TRUE
cg00153395	chr1	1	TRUE
cg00153707	chr9	0.983659	TRUE
cg00153856	chr1	0	TRUE
cg00154888	chr12	0.216528	TRUE
cg00155485	chr12	0	TRUE
cg00155514	chr1	0	TRUE
cg00155535	chr12	0.939425	TRUE
cg00155609	chr19	0	TRUE
cg00155879	chr10	0.43953	TRUE
cg00156216	chr11	0	TRUE
cg00156230	chr7	0.946523	TRUE
cg00156427	chr11	0.40916	TRUE
cg00156551	chr8	1	TRUE
cg00156744	chr5	0	TRUE
cg00156995	chr13	1	TRUE
cg00157043	chr11	0.571634	TRUE
cg00157179	chr1	0.0680292	TRUE
cg00157456	chr16	0.186437	TRUE
cg00157638	chr1	1	TRUE
cg00157796	chr6	0	TRUE
cg00158122	chr10	0.106015	TRUE
cg00158308	chr13	0	TRUE
cg00158333	chr17	0	TRUE
cg00158683	chr3	0	TRUE
cg00159243	chr12	0.709293	TRUE
cg00160388	chr16	0.0399013	TRUE
cg00160914	chr1	0.259015	TRUE
cg00161247	chr9	0.810589	TRUE
cg00161556	chr11	0.339316	TRUE
cg00162064	chr1	1	TRUE
cg00162104	chr4	0.590608	TRUE
cg00162206	chr2	0	TRUE
cg00162348	chr16	0	TRUE
cg00162401	chr6	0	TRUE
cg00162643	chr9	0.154335	TRUE
cg00162806	chr10	0.117096	TRUE
cg00162969	chr12	0.594152	TRUE
cg00163006	chr17	1	TRUE
cg00163546	chr18	1	TRUE
cg00163702	chr16	0.943195	TRUE
cg00164235	chr4	0	TRUE
cg00164898	chr22	0.0867603	TRUE
cg00164941	chr2	0.591769	TRUE
cg00165323	chr1	0.00357731	TRUE
cg00165535	chr1	0.111223	TRUE
cg00165631	chr1	0.663923	TRUE
cg00166216	chr3	0.147522	TRUE
cg00166372	chr3	0.272472	TRUE
cg00166722	chr3	1	TRUE
cg00167076	chr3	0.786986	TRUE
cg00167491	chr5	0.0344401	TRUE
cg00167504	chr7	0	TRUE
cg00167958	chr22	0.893639	TRUE
cg00168009	chr3	0	TRUE
cg00168118	chr16	0.527709	TRUE
cg00168205	chr12	0	TRUE
cg00168785	chr2	0.155011	TRUE
cg00168815	chr4	0.0314807	TRUE
cg00169354	chr20	0.650414	TRUE
cg00169419	chr4	0.941662	TRUE
cg00169617	chr3	0.224527	TRUE
cg00169725	chr5	0.24231	TRUE
cg00169737	chr12	0.636236	TRUE
cg00169776	chr1	0.126386	TRUE
cg00169897	chr16	1	TRUE
cg00170213	chr6	0.232333	TRUE
cg00170295	chr6	1	TRUE
cg00170438	chr20	1	TRUE
cg00170564	chr12	0	TRUE
cg00170796	chr1	0.366814	TRUE
cg00171126	chr21	0	TRUE
cg00171154	chr12	0.597009	TRUE
cg00172270	chr12	0	TRUE
cg00172376	chr21	0.23226	TRUE
cg00172812	chr1	0.0237303	TRUE
cg00172872	chr12	1	TRUE
cg00173010	chr7	0	TRUE
cg00173063	chr8	1	TRUE
cg00174421	chr8	0	TRUE
cg00174500	chr14	0.450569	TRUE
cg00174508	chr12	0.847775	TRUE
cg00174573	chr12	0.307552	TRUE
cg00174718	chr6	1	TRUE
cg00174743	chr21	0.312447	TRUE
cg00174851	chr7	0.629611	TRUE
cg00174901	chr19	0.0497549	TRUE
cg00174992	chr2	0.953021	TRUE
cg00175344	chr13	0.437138	TRUE
cg00175823	chr12	0.138045	TRUE
cg00175844	chr8	1	TRUE
cg00176210	chr8	0.765214	TRUE
cg00176638	chr1	0.285185	TRUE
cg00177013	chr20	0	TRUE
cg00177127	chr1	0.66762	TRUE
cg00177875	chr11	0.874155	TRUE
cg00177923	chr8	0	TRUE
cg00178356	chr13	0.443983	TRUE
cg00178511	chr3	0.154163	TRUE
cg00178551	chr8	1	TRUE
cg00178790	chr18	0	TRUE
cg00178850	chr1	0.265889	TRUE
cg00178928	chr2	0.362411	TRUE
cg00179217	chr6	0	TRUE
cg00179374	chr7	0.53305	TRUE
cg00179940	chr12	1	TRUE
cg00180012	chr6	0.268682	TRUE
cg00180447	chr3	0.623491	TRUE
cg00180666	chr20	0.301448	TRUE
cg00180762	chr12	0.106675	TRUE
cg00181054	chr13	0	TRUE
cg00181432	chr3	0.232415	TRUE
cg00181834	chr10	0	TRUE
cg00181968	chr1	0	TRUE
cg00182294	chr11	0.16264	TRUE
cg00182758	chr17	0.291034	TRUE
cg00182893	chr6	0.988679	TRUE
cg00183684	chr1	0	TRUE
cg00183888	chr7	1	TRUE
cg00183916	chr17	0	TRUE
cg00184235	chr8	0	TRUE
cg00184452	chr1	0.127426	TRUE
cg00184457	chr8	1	TRUE
cg00184732	chr15	0.0180832	TRUE
cg00184884	chr22	0.0933535	TRUE
cg00184893	chr17	0	TRUE
cg00185413	chr3	1	TRUE
cg00185839	chr11	0	TRUE
cg00186141	chr7	0	TRUE
cg00186499	chr20	1	TRUE
cg00186701	chr8	0.518803	TRUE
cg00187059	chr6	0.547704	TRUE
cg00187120	chr7	0.340846	TRUE
cg00187380	chr12	0	TRUE
cg00187437	chr6	1	TRUE
cg00187557	chr5	0.812325	TRUE
cg00187671	chr17	0	TRUE
cg00187692	chr13	0.640723	TRUE
cg00187933	chr4	0	TRUE
cg00189366	chr10	0.227463	TRUE
cg00190355	chr5	1	TRUE
cg00191853	chr8	1	TRUE
cg00191882	chr17	0	TRUE
cg00192220	chr16	0.698438	TRUE
cg00192275	chr10	1	TRUE
cg00192882	chr17	0.591722	TRUE
cg00194146	chr6	0	TRUE
cg00194780	chr17	0.783396	TRUE
cg00196372	chr9	0	TRUE
cg00196414	chr2	0	TRUE
cg00196671	chr18	0	TRUE
cg00196787	chr17	0	TRUE
cg00196827	chr18	0	TRUE
cg00197026	chr6	0.54193	TRUE
cg00197058	chr17	0.70714	TRUE
cg00197373	chr5	0.749684	TRUE
cg00197381	chr5	0.0548624	TRUE
cg00197641	chr14	0.163457	TRUE
cg00197993	chr6	1	TRUE
cg00199048	chr17	0	TRUE
cg00199091	chr6	1	TRUE
cg00200063	chr17	0	TRUE
cg00200164	chr6	0.734396	TRUE
cg00200803	chr20	0.479107	TRUE
cg00201185	chr12	0	TRUE
cg00201234	chr3	0.608373	TRUE
cg00201296	chr2	1	TRUE
cg00201670	chr21	0	TRUE
cg00201779	chr6	1	TRUE
cg00202454	chr15	0.377888	TRUE
cg00202460	chr15	0.541665	TRUE
cg00202479	chr6	0.965035	TRUE
cg00202702	chr11	0	TRUE
cg00203035	chr16	0.0861703	TRUE
cg00203284	chr1	0.21469	TRUE
cg00203456	chr6	0	TRUE
cg00203915	chr7	0.913404	TRUE
cg00204262	chr19	0.265066	TRUE
cg00205658	chr7	0.510481	TRUE
cg00205756	chr16	0.964743	TRUE
cg00206052	chr10	0.0215552	TRUE
cg00206468	chr16	0.953742	TRUE
cg00207428	chr16	0.470308	TRUE
cg00207534	chr16	0	TRUE
cg00207731	chr15	0	TRUE
cg00207873	chr16	1	TRUE
cg00208504	chr4	0.43121	TRUE
cg00208967	chr19	0.0873247	TRUE
cg00209037	chr22	0	TRUE
cg00209923	chr15	1	TRUE
cg00210204	chr6	0	TRUE
cg00210249	chr10	0.56234	TRUE
cg00210473	chr6	0.943621	TRUE
cg00210562	chr15	0.0291317	TRUE
cg00210842	chr12	0.0217572	TRUE
cg00210856	chr5	1	TRUE
cg00210994	chr3	0.163889	TRUE
cg00211115	chr11	0.698051	TRUE
cg00211630	chr11	0.467077	TRUE
cg00211661	chr11	0.293661	TRUE
cg00212470	chr1	1	TRUE
cg00212786	chr2	1	TRUE
cg00212988	chr10	0.197409	TRUE
cg00213004	chr1	0.610698	TRUE
cg00213052	chr18	0.660764	TRUE
cg00213142	chr3	1	TRUE
cg00213295	chr17	1	TRUE
cg00213714	chr9	0.24509	TRUE
cg00214044	chr13	1	TRUE
cg00214171	chr17	0.585739	TRUE
cg00214294	chr4	0	TRUE
cg00215182	chr1	1	TRUE
cg00215801	chr6	0	TRUE
cg00215896	chr17	1	TRUE
cg00216361	chr3	0.0232555	TRUE
cg00216758	chr11	0	TRUE
cg00216831	chr16	0	TRUE
cg00216901	chr20	0.41361	TRUE
cg00217795	chr14	0.457771	TRUE
cg00218146	chr15	0	TRUE
cg00218404	chr18	1	TRUE
cg00218415	chr20	1	TRUE
cg00218770	chr20	0.842299	TRUE
cg00218893	chr17	0.383988	TRUE
cg00219169	chr10	0.254158	TRUE
cg00219282	chr6	0.270434	TRUE
cg00219626	chr6	0.0852688	TRUE
cg00220102	chr16	0.215238	TRUE
cg00220113	chr8	1	TRUE
cg00220294	chr16	0.164486	TRUE
cg00220389	chr17	0	TRUE
cg00220455	chr11	0.971039	TRUE
cg00220492	chr15	0	TRUE
cg00221012	chr17	0.724582	TRUE
cg00221070	chr5	0	TRUE
cg00221382	chr16	0.106922	TRUE
cg00221494	chr13	0.0502927	TRUE
cg00221668	chr11	1	TRUE
cg00221718	chr3	1	TRUE
cg00221969	chr16	0	TRUE
cg00222175	chr22	0.785792	TRUE
cg00222291	chr16	0	TRUE
cg00222341	chr15	0.414324	TRUE
cg00222601	chr5	0	TRUE
cg00222690	chr6	0.0992766	TRUE
cg00223135	chr15	1	TRUE
cg00223186	chr1	0.121585	TRUE
cg00223950	chr1	0	TRUE
cg00224083	chr4	0.882491	TRUE
cg00224471	chr5	0.877849	TRUE
cg00224508	chr1	0	TRUE
cg00224807	chr2	0.0297608	TRUE
cg00225070	chr15	0	TRUE
cg00225157	chr6	0.301077	TRUE
cg00225623	chr13	0	TRUE
cg00226831	chr15	1	TRUE
cg00226849	chr18	0.909154	TRUE
cg00226931	chr11	0	TRUE
cg00227156	chr22	0.34736	TRUE
cg00227225	chr15	0	TRUE
cg00227781	chr17	0	TRUE
cg00228017	chr18	0.00697085	TRUE
cg00228390	chr6	0.0944566	TRUE
cg00228735	chr7	0.785012	TRUE
cg00229387	chr6	0.507722	TRUE
cg00230074	chr17	0.0771419	TRUE
cg00230271	chr4	0	TRUE
cg00230368	chr6	0.377712	TRUE
cg00230700	chr4	0	TRUE
cg00231140	chr18	0	TRUE
cg00231192	chr4	0.83981	TRUE
cg00231405	chr17	0	TRUE
cg00231483	chr18	0.652875	TRUE
cg00231528	chr1	1	TRUE
cg00231771	chr6	0.905483	TRUE
cg00231920	chr20	0	TRUE
cg00231945	chr21	0.741942	TRUE
cg00232059	chr22	0.560315	TRUE
cg00232160	chr9	0.903898	TRUE
cg00232500	chr9	0.690018	TRUE
cg00232535	chr7	0.73757	TRUE
cg00232827	chr5	0.844454	TRUE
cg00233028	chr11	0.31988	TRUE
cg00233307	chr19	0.12004	TRUE
cg00233565	chr5	0	TRUE
cg00234261	chr7	0.38743	TRUE
cg00234321	chr3	0.818524	TRUE
cg00234613	chr4	1	TRUE
cg00234616	chr2	0.0682992	TRUE
cg00234625	chr5	0.571485	TRUE
cg00235508	chr17	0.167738	TRUE
cg00235933	chr5	0	TRUE
cg00236576	chr17	0.481302	TRUE
cg00236831	chr12	0	TRUE
cg00236832	chr17	0.0146854	TRUE
cg00236919	chr4	0.0359994	TRUE
cg00237010	chr12	0.445344	TRUE
cg00237631	chr7	0	TRUE
cg00238213	chr7	0.610755	TRUE
cg00238295	chr10	0.974559	TRUE
cg00238510	chr2	0.88164	TRUE
cg00238662	chr6	0.407442	TRUE
cg00238770	chr12	0.201797	TRUE
cg00238848	chr11	0.724204	TRUE
cg00239025	chr2	0.864827	TRUE
cg00239061	chr17	0	TRUE
cg00239353	chr16	0.745386	TRUE
cg00239657	chr5	1	TRUE
cg00239685	chr3	0	TRUE
cg00239835	chr11	0.430605	TRUE
cg00240007	chr12	0.183429	TRUE
cg00240432	chr7	0	TRUE
cg00240767	chr16	1	TRUE
cg00240880	chr20	0.269286	TRUE
cg00241076	chr16	0.21027	TRUE
cg00241281	chr14	0.351342	TRUE
cg00241355	chr12	0	TRUE
cg00241432	chr13	1	TRUE
cg00241638	chr8	1	TRUE
cg00241712	chr22	0	TRUE
cg00242035	chr11	1	TRUE
cg00242098	chr1	1	TRUE
cg00242299	chr8	0	TRUE
cg00242627	chr1	0	TRUE
cg00242839	chr10	0.334803	TRUE
cg00243272	chr22	1	TRUE
cg00243313	chr5	0	TRUE
cg00244001	chr10	0.270737	TRUE
cg00244308	chr2	0.332551	TRUE
cg00244776	chr6	0.399153	TRUE
cg00244983	chr10	0	TRUE
cg00245454	chr4	0.920275	TRUE
cg00245613	chr8	1	TRUE
cg00245885	chr5	0.740449	TRUE
cg00246301	chr2	1	TRUE
cg00246451	chr1	0.212873	TRUE
cg00247334	chr3	0.21299	TRUE
cg00247489	chr1	0.555347	TRUE
cg00247535	chr3	1	TRUE
cg00247748	chr3	0.534446	TRUE
cg00248574	chr4	1	TRUE
cg00248804	chr17	0	TRUE
cg00248856	chr11	1	TRUE
cg00249032	chr20	0.385105	TRUE
cg00249576	chr6	0.627605	TRUE
cg00250409	chr16	0.463748	TRUE
cg00250414	chr7	0.775348	TRUE
cg00250483	chr1	0.884325	TRUE
cg00250743	chr10	1	TRUE
cg00251358	chr5	0.879901	TRUE
cg00251622	chr4	0.981357	TRUE
cg00251678	chr1	1	TRUE
cg00251973	chr12	0.836732	TRUE
cg00252332	chr13	0	TRUE
cg00252422	chr1	0	TRUE
cg00252472	chr6	0.656767	TRUE
cg00252781	chr1	0.264787	TRUE
cg00252804	chr1	0.928024	TRUE
cg00252813	chr12	0	TRUE
cg00252814	chr7	1	TRUE
cg00253398	chr22	1	TRUE
cg00253851	chr16	0.493763	TRUE
cg00254133	chr20	0	TRUE
cg00254886	chr5	0	TRUE
cg00255099	chr5	1	TRUE
cg00255699	chr1	1	TRUE
cg00255919	chr5	0.697122	TRUE
cg00256046	chr1	0.815665	TRUE
cg00256074	chr16	1	TRUE
cg00256166	chr15	0.0298642	TRUE
cg00256281	chr22	0	TRUE
cg00256767	chr1	0	TRUE
cg00257202	chr4	0	TRUE
cg00257455	chr1	0.504315	TRUE
cg00257712	chr4	0.486068	TRUE
cg00258316	chr1	0.318821	TRUE
cg00258550	chr21	0.393768	TRUE
cg00258597	chr8	0	TRUE
cg00258873	chr6	0.173459	TRUE
cg00259019	chr2	0.306214	TRUE
cg00259279	chr1	1	TRUE
cg00259549	chr8	0.735407	TRUE
cg00259834	chr3	0.571461	TRUE
cg00260116	chr7	0.0531814	TRUE
cg00260883	chr16	0.512334	TRUE
cg00261552	chr12	0	TRUE
cg00261569	chr3	0.737037	TRUE
cg00261781	chr2	0.0579784	TRUE
cg00262030	chr8	0.491964	TRUE
cg00262415	chr1	0.294148	TRUE
cg00262621	chr1	0	TRUE
cg00262776	chr12	0	TRUE
cg00263248	chr14	0.0948591	TRUE
cg00263368	chr7	0.50877	TRUE
cg00264129	chr5	0.497449	TRUE
cg00264208	chr22	0	TRUE
cg00264419	chr8	1	TRUE
cg00264441	chr11	0	TRUE
cg00265238	chr7	0	TRUE
cg00265277	chr9	0.771174	TRUE
cg00265415	chr1	0	TRUE
cg00265490	chr8	0	TRUE
cg00266009	chr8	0	TRUE
cg00266322	chr17	0	TRUE
cg00266920	chr18	0	TRUE
cg00267713	chr1	0	TRUE
cg00268009	chr4	0	TRUE
cg00268086	chr17	0.154458	TRUE
cg00268338	chr10	0	TRUE
cg00268518	chr11	0	TRUE
cg00268547	chr5	0.316006	TRUE
cg00269115	chr1	0	TRUE
cg00269643	chr7	0.157214	TRUE
cg00269725	chr6	1	TRUE
cg00269817	chr8	1	TRUE
cg00269996	chr6	0.268288	TRUE
cg00270141	chr2	0.488769	TRUE
cg00270778	chr2	0.0470138	TRUE
cg00271311	chr11	1	TRUE
cg00272971	chr10	0	TRUE
cg00273068	chr20	0.150366	TRUE
cg00273449	chr2	0.516722	TRUE
cg00274279	chr6	0	TRUE
cg00274399	chr13	0.0264553	TRUE
cg00274587	chr6	0.102832	TRUE
cg00274965	chr21	0	TRUE
cg00275232	chr19	0	TRUE
cg00276389	chr22	0.993859	TRUE
cg00276797	chr10	0	TRUE
cg00276799	chr11	0.11983	TRUE
cg00276826	chr10	0.539651	TRUE
cg00277334	chr10	0.701894	TRUE
cg00277753	chr10	0.580669	TRUE
cg00277898	chr6	0.368068	TRUE
cg00278329	chr16	0.190887	TRUE
cg00278366	chr12	0.300803	TRUE
cg00278692	chr10	0	TRUE
cg00280220	chr17	0.386426	TRUE
cg00280758	chr4	0.330102	TRUE
cg00280799	chr7	1	TRUE
cg00280895	chr2	0.436457	TRUE
cg00281048	chr4	0.985756	TRUE
cg00281600	chr7	0	TRUE
cg00282195	chr2	1	TRUE
cg00282244	chr7	0.426087	TRUE
cg00282347	chr1	0.17432	TRUE
cg00282683	chr7	0	TRUE
cg00282953	chr5	0.355493	TRUE
cg00283535	chr8	1	TRUE
cg00283986	chr2	0.900846	TRUE
cg00285294	chr7	1	TRUE
cg00285314	chr16	0	TRUE
cg00285620	chr11	1	TRUE
cg00286188	chr2	0.622255	TRUE
cg00287322	chr2	0	TRUE
cg00287477	chr4	0.370007	TRUE
cg00287773	chr5	1	TRUE
cg00287974	chr7	0.0519478	TRUE
cg00288562	chr7	0	TRUE
cg00289081	chr22	0	TRUE
cg00289254	chr11	0.00439742	TRUE
cg00289503	chr20	0.153709	TRUE
cg00290028	chr13	0.181986	TRUE
cg00290101	chr11	1	TRUE
cg00290303	chr7	0.952687	TRUE
cg00290483	chr17	0.0835623	TRUE
cg00290506	chr1	0.362868	TRUE
cg00290607	chr11	0.512287	TRUE
cg00290758	chr10	0.653289	TRUE
cg00290994	chr1	0.0601923	TRUE
cg00291478	chr10	0.410822	TRUE
cg00291877	chr15	0.110189	TRUE
cg00292029	chr6	0.23459	TRUE
cg00292071	chr7	0.877408	TRUE
cg00292636	chr1	1	TRUE
cg00292664	chr10	0	TRUE
cg00292669	chr1	0.833281	TRUE
cg00292701	chr4	0.62417	TRUE
cg00292971	chr7	0.379589	TRUE
cg00292986	chr2	0	TRUE
cg00293060	chr12	0.83306	TRUE
cg00293245	chr11	0	TRUE
cg00293409	chr3	0	TRUE
cg00293644	chr1	0.780216	TRUE
cg00294382	chr12	0.78556	TRUE
cg00294940	chr1	1	TRUE
cg00295259	chr2	0.394595	TRUE
cg00295293	chr8	0.492433	TRUE
cg00295308	chr10	1	TRUE
cg00295485	chr2	0.0547731	TRUE
cg00295604	chr11	0.0787283	TRUE
cg00295887	chr8	0	TRUE
cg00296182	chr10	0	TRUE
cg00296279	chr10	0	TRUE
cg00297584	chr12	0.102529	TRUE
cg00297600	chr8	0.805181	TRUE
cg00297950	chr1	0.0448498	TRUE
cg00298020	chr1	0	TRUE
cg00298065	chr19	0.00683121	TRUE
cg00298481	chr11	0	TRUE
cg00298796	chr8	0	TRUE
cg00298910	chr2	0	TRUE
cg00299230	chr11	0.944248	TRUE
cg00299511	chr11	0.512004	TRUE
cg00299736	chr11	0.874089	TRUE
cg00299767	chr14	0.0223436	TRUE
cg00299820	chr1	1	TRUE
cg00299893	chr15	0.934066	TRUE
cg00299943	chr22	1	TRUE
cg00300039	chr1	0.0322261	TRUE
cg00300637	chr5	0.6922	TRUE
cg00300672	chr2	0.996871	TRUE
cg00300908	chr15	0.668283	TRUE
cg00301660	chr8	0.27835	TRUE
cg00301879	chr4	0	FALSE
cg00302081	chr9	0.490913	TRUE
cg00302340	chr12	0.512857	TRUE
cg00302494	chr2	0	TRUE
cg00302793	chr4	0	TRUE
cg00303111	chr10	1	TRUE
cg00303183	chr2	0	TRUE
cg00303335	chr7	0.672724	TRUE
cg00303723	chr19	0	TRUE
cg00303811	chr2	0.709475	TRUE
cg00303982	chr8	0	TRUE
cg00304072	chr15	0	TRUE
cg00304185	chr16	0	TRUE
cg00305629	chr9	0.642972	TRUE
cg00305740	chr7	0.628395	TRUE
cg00306298	chr2	0	TRUE
cg00306311	chr4	0.497036	TRUE
cg00306390	chr1	0.155274	TRUE
cg00306426	chr1	0	TRUE
cg00306578	chr16	1	TRUE
cg00306951	chr2	1	TRUE
cg00307066	chr4	0.541863	TRUE
cg00308133	chr19	0.159791	TRUE
cg00308503	chr5	0.976299	TRUE
cg00308909	chr10	0.567308	TRUE
cg00308914	chr5	0.635623	TRUE
cg00309056	chr7	0	TRUE
cg00309133	chr15	0.542162	TRUE
cg00309204	chr17	0	TRUE
cg00309402	chr4	1	TRUE
cg00310257	chr3	0.720517	TRUE
cg00310412	chr15	0.364696	TRUE
cg00310523	chr12	0.646146	TRUE
cg00311035	chr7	0.369568	TRUE
cg00311768	chr8	0.118329	TRUE
cg00311984	chr8	0	TRUE
cg00312474	chr1	0.397351	TRUE
cg00312508	chr10	0.950233	TRUE
cg00312919	chr7	0	TRUE
cg00312921	chr4	0	TRUE
cg00313106	chr1	0.258032	TRUE
cg00313685	chr7	0.980855	TRUE
cg00313722	chr19	0.69739	TRUE
cg00313750	chr13	1	TRUE
cg00313876	chr13	0.236385	TRUE
cg00313981	chr1	0	TRUE
cg00314622	chr3	0.501134	TRUE
cg00314660	chr2	0.643061	TRUE
cg00315239	chr16	0.899626	TRUE
cg00315394	chr5	0.489267	TRUE
cg00315563	chr3	1	TRUE
cg00316341	chr10	1	TRUE
cg00316759	chr15	0.122776	TRUE
cg00316921	chr8	0.69857	TRUE
cg00317577	chr15	0.572533	TRUE
cg00317626	chr1	1	TRUE
cg00317680	chr8	0	TRUE
cg00317886	chr13	0.538284	TRUE
cg00318436	chr16	0.987862	TRUE
cg00318573	chr20	0.0734869	TRUE
cg00318865	chr12	0	TRUE
cg00318947	chr7	1	TRUE
cg00319168	chr2	0	TRUE
cg00319359	chr11	0	TRUE
cg00319692	chr8	1	TRUE
cg00319761	chr16	0	TRUE
cg00319774	chr8	0.318881	TRUE
cg00319912	chr19	0.328936	TRUE
cg00320159	chr20	0	TRUE
cg00320243	chr19	0	TRUE
cg00320980	chr10	0.963607	TRUE
cg00321065	chr1	0	TRUE
cg00321288	chr12	1	TRUE
cg00321478	chr1	1	TRUE
cg00321850	chr1	0.182713	TRUE
cg00321931	chr4	0.0196024	TRUE
cg00322262	chr4	0.932243	TRUE
cg00322942	chr4	0	TRUE
cg00322946	chr10	0.16179	TRUE
cg00323014	chr10	0.373836	TRUE
cg00323305	chr3	0	TRUE
cg00323501	chr22	0.266246	TRUE
cg00323631	chr4	0	TRUE
cg00323915	chr7	1	TRUE
cg00323916	chr22	0.0228365	TRUE
cg00324097	chr17	0.341353	TRUE
cg00324108	chr4	0.76777	TRUE
cg00324161	chr3	0	TRUE
cg00324438	chr16	0.154217	TRUE
cg00324520	chr15	0.824618	TRUE
cg00324733	chr11	0	TRUE
cg00325149	chr1	0.0953703	TRUE
cg00325491	chr11	1	TRUE
cg00325866	chr15	0.117852	TRUE
cg00325920	chr3	1	TRUE
cg00326231	chr22	0.11656	TRUE
cg00326251	chr8	0.223466	TRUE
cg00326259	chr5	0.123558	TRUE
cg00326813	chr8	0.640622	TRUE
cg00326908	chr8	0.612725	TRUE
cg00327185	chr11	0	TRUE
cg00327524	chr8	0	FALSE
cg00328058	chr1	0.73763	TRUE
cg00328219	chr8	0.924724	TRUE
cg00328376	chr7	0	FALSE
cg00328729	chr11	0.391811	TRUE
cg00328740	chr3	1	TRUE
cg00328900	chr5	0.0298817	TRUE
cg00329052	chr4	1	TRUE
cg00329270	chr3	0	TRUE
cg00329447	chr8	0.248356	TRUE
cg00329618	chr12	0	TRUE
cg00330370	chr1	0.142289	TRUE
cg00330825	chr11	0.486376	TRUE
cg00330929	chr19	0.252839	TRUE
cg00331101	chr4	1	TRUE
cg00331237	chr12	0.0605605	TRUE
cg00332153	chr4	0	TRUE
cg00332421	chr9	1	TRUE
cg00332680	chr10	0.412569	TRUE
cg00332745	chr16	0	TRUE
cg00332850	chr8	1	TRUE
cg00333226	chr7	0	TRUE
cg00333483	chr17	0	TRUE
cg00333528	chr6	0.710951	TRUE
cg00334177	chr6	0.151831	TRUE
cg00334507	chr16	0.451915	TRUE
cg00334691	chr15	1	TRUE
cg00334976	chr20	1	TRUE
cg00335286	chr18	0.618979	TRUE
cg00335908	chr16	0.126308	TRUE
cg00336149	chr3	1	TRUE
cg00336376	chr20	0	TRUE
cg00336605	chr19	0.261026	TRUE
cg00336700	chr2	0	TRUE
cg00336706	chr5	0.0731446	TRUE
cg00337703	chr10	0.789158	TRUE
cg00337916	chr7	0.281495	TRUE
cg00338116	chr13	0	TRUE
cg00338702	chr12	0.665858	TRUE
cg00338928	chr2	0	TRUE
cg00339195	chr16	0.102104	TRUE
cg00339241	chr15	0.655264	TRUE
cg00339331	chr19	0.251585	TRUE
cg00339441	chr10	0.7339	TRUE
cg00339695	chr16	0.44954	TRUE
cg00339913	chr8	0.440367	TRUE
cg00341935	chr8	1	TRUE
cg00342530	chr9	0.677794	TRUE
cg00342532	chr19	0.115542	TRUE
cg00343092	chr22	0.0619635	TRUE
cg00344260	chr12	0	TRUE
cg00344358	chr12	0.0559912	TRUE
cg00344380	chr4	0.598494	TRUE
cg00344411	chr3	0.998869	TRUE
cg00344443	chr11	0.307484	TRUE
cg00344577	chr17	0.603596	TRUE
cg00345443	chr3	0	TRUE
cg00345965	chr1	0	TRUE
cg00346256	chr19	1	TRUE
cg00346326	chr13	0.251991	TRUE
cg00346392	chr16	0.781878	TRUE
cg00346446	chr1	0.379158	TRUE
cg00346898	chr1	0.532175	TRUE
cg00346985	chr1	0.354161	TRUE
cg00347198	chr17	0	TRUE
cg00347369	chr8	0.535188	TRUE
cg00347620	chr12	1	TRUE
cg00347775	chr22	1	TRUE
cg00347904	chr6	0.246064	TRUE
cg00348467	chr17	0.0178351	TRUE
cg00348900	chr16	1	TRUE
cg00348992	chr1	0.43373	TRUE
cg00349925	chr13	1	TRUE
cg00349943	chr20	0	TRUE
cg00350003	chr17	0	TRUE
cg00350199	chr11	1	TRUE
cg00350296	chr11	0.16236	TRUE
cg00350441	chr16	0	TRUE
cg00350448	chr11	0.431007	TRUE
cg00350478	chr6	1	TRUE
cg00350702	chr20	0	TRUE
cg00350931	chr4	0.883962	TRUE
cg00351011	chr19	0.0378767	TRUE
cg00351119	chr6	1	TRUE
cg00351324	chr10	0	TRUE
cg00351813	chr17	0.816558	TRUE
cg00352106	chr1	0.966859	TRUE
cg00352576	chr9	0.206548	TRUE
cg00353112	chr15	0.23163	TRUE
cg00353923	chr7	0.19414	TRUE
cg00354542	chr16	0.526875	TRUE
cg00354572	chr12	0.494426	TRUE
cg00354641	chr6	0.293702	TRUE
cg00354884	chr17	0.181294	TRUE
cg00355281	chr7	0	TRUE
cg00355389	chr3	0.631422	TRUE
cg00355656	chr1	0.276433	TRUE
cg00355699	chr13	1	TRUE
cg00355802	chr8	0	TRUE
cg00355829	chr3	0.299188	TRUE
cg00355909	chr16	0.037046	TRUE
cg00356183	chr7	0	TRUE
cg00356645	chr6	0.956785	TRUE
cg00356694	chr17	0.875199	TRUE
cg00356916	chr1	1	TRUE
cg00357273	chr6	0.986774	TRUE
cg00357958	chr12	0.149494	TRUE
cg00358023	chr7	1	TRUE
cg00358132	chr11	1	TRUE
cg00358278	chr16	0.646248	TRUE
cg00359181	chr2	0	TRUE
cg00359325	chr3	0	TRUE
cg00360256	chr12	0.0103268	TRUE
cg00360468	chr4	0	TRUE
cg00361017	chr6	0.97873	TRUE
cg00363082	chr5	0.809615	TRUE
cg00363737	chr10	1	TRUE
cg00363813	chr12	0	TRUE
cg00364287	chr12	0.36397	TRUE
cg00364339	chr3	1	TRUE
cg00364445	chr19	1	TRUE
cg00364457	chr6	0.535495	TRUE
cg00364557	chr12	1	TRUE
cg00364758	chr7	1	TRUE
cg00365524	chr1	0.123217	TRUE
cg00366103	chr7	0.104442	TRUE
cg00367281	chr8	1	TRUE
cg00368022	chr5	0	TRUE
cg00368059	chr10	0.273765	TRUE
cg00368415	chr1	0.253293	TRUE
cg00368973	chr17	0	TRUE
cg00369024	chr20	0.108162	TRUE
cg00369194	chr7	1	TRUE
cg00369202	chr6	0.375688	TRUE
cg00369376	chr2	0.783428	TRUE
cg00369414	chr16	0.424376	TRUE
cg00369640	chr2	0.237452	TRUE
cg00370022	chr15	0.566374	TRUE
cg00370608	chr16	0.439527	TRUE
cg00371134	chr1	1	TRUE
cg00371418	chr17	0	TRUE
cg00371627	chr7	0.0196024	TRUE
cg00371891	chr19	0	TRUE
cg00372375	chr8	0.0765619	TRUE
cg00373020	chr1	1	TRUE
cg00373436	chr3	0.885266	TRUE
cg00373499	chr5	0	TRUE
cg00373616	chr1	0.751737	TRUE
cg00374333	chr2	0	TRUE
cg00374672	chr7	0.348621	TRUE
cg00375132	chr10	1	TRUE
cg00375939	chr3	0	FALSE
cg00375964	chr4	0.00727648	TRUE
cg00375983	chr1	0.946105	TRUE
cg00376553	chr7	0	TRUE
cg00376625	chr10	0.0641121	TRUE
cg00376639	chr19	0	TRUE
cg00376654	chr16	1	TRUE
cg00376979	chr21	1	TRUE
cg00377074	chr6	0.382404	TRUE
cg00377497	chr8	0.809654	TRUE
cg00377915	chr10	1	TRUE
cg00378158	chr22	1	TRUE
cg00378218	chr17	0	TRUE
cg00378292	chr9	0.492781	TRUE
cg00378510	chr19	0	TRUE
cg00378658	chr11	0.983065	TRUE
cg00379107	chr16	0	TRUE
cg00379559	chr16	0.956858	TRUE
cg00379619	chr19	1	TRUE
cg00379733	chr3	1	TRUE
cg00380464	chr6	0	TRUE
cg00380780	chr6	1	TRUE
cg00380835	chr19	1	TRUE
cg00380860	chr3	0.55824	TRUE
cg00381057	chr19	0	TRUE
cg00381076	chr18	0	TRUE
cg00381442	chr16	0.371291	TRUE
cg00381755	chr16	0	TRUE
cg00382515	chr2	0.062278	TRUE
cg00383220	chr11	0.767935	TRUE
cg00384537	chr17	1	TRUE
cg00384707	chr19	1	TRUE
cg00384847	chr1	0.103924	TRUE
cg00386008	chr12	1	TRUE
cg00386101	chr2	0.976671	TRUE
cg00386408	chr5	0.0405624	TRUE
cg00386456	chr19	0.0259281	TRUE
cg00386725	chr1	0.637062	TRUE
cg00387090	chr1	1	TRUE
cg00387115	chr12	0.1336	TRUE
cg00387445	chr1	0.506428	TRUE
cg00387964	chr4	0.800842	TRUE
cg00388154	chr15	1	TRUE
cg00388605	chr1	0.037046	TRUE
cg00388871	chr20	0.65337	TRUE
cg00390143	chr12	1	TRUE
cg00390259	chr13	1	TRUE
cg00390511	chr7	1	TRUE
cg00390769	chr7	0.0802675	TRUE
cg00391479	chr19	0.645241	TRUE
cg00391668	chr1	1	TRUE
cg00392377	chr19	0.144321	TRUE
cg00392832	chr3	0	TRUE
cg00393263	chr1	0.727505	TRUE
cg00393376	chr7	0	TRUE
cg00393487	chr3	1	TRUE
cg00393585	chr4	0.896481	TRUE
cg00393837	chr2	0	TRUE
cg00393992	chr12	0.774629	TRUE
cg00394221	chr1	1	TRUE
cg00394658	chr11	0.125268	TRUE
cg00394823	chr16	0.987069	TRUE
cg00395501	chr1	0.466582	TRUE
cg00395697	chr12	0.0250799	TRUE
cg00395894	chr19	0.46238	TRUE
cg00395931	chr1	0	TRUE
cg00395990	chr11	0.971551	TRUE
cg00396427	chr16	0.807666	TRUE
cg00396625	chr1	0	TRUE
cg00396687	chr15	0	TRUE
cg00396894	chr2	0.855953	TRUE
cg00397283	chr19	0	TRUE
cg00397324	chr21	0	TRUE
cg00397422	chr17	1	TRUE
cg00397575	chr15	0.277262	TRUE
cg00397635	chr1	0.0607567	TRUE
cg00397740	chr1	0	TRUE
cg00398048	chr4	0.183476	TRUE
cg00398276	chr7	0	TRUE
cg00398764	chr15	0.0437113	TRUE
cg00399295	chr16	1	TRUE
cg00399483	chr18	0.32661	TRUE
cg00400221	chr8	0	TRUE
cg00400448	chr15	0.331563	TRUE
cg00400832	chr7	0.0948141	TRUE
cg00400987	chr16	1	TRUE
cg00401032	chr19	0.47488	TRUE
cg00401091	chr20	0	TRUE
cg00401691	chr3	0.516352	TRUE
cg00401796	chr20	1	TRUE
cg00401972	chr16	0.893914	TRUE
cg00405070	chr12	0	TRUE
cg00405190	chr2	0.25821	TRUE
cg00405568	chr17	0.107867	TRUE
cg00405677	chr5	0	TRUE
cg00405843	chr7	0	TRUE
cg00406392	chr10	0.111958	TRUE
cg00406796	chr19	0	TRUE
cg00407062	chr9	0.63036	TRUE
cg00407150	chr3	0.641982	TRUE
cg00407468	chr9	0.563328	TRUE
cg00407537	chr16	0.831752	TRUE
cg00408773	chr1	0.664501	TRUE
cg00408964	chr2	0	TRUE
cg00409104	chr17	0.898243	TRUE
cg00409183	chr15	0	TRUE
cg00409684	chr10	0	TRUE
cg00409816	chr1	1	TRUE
cg00410034	chr22	0.605375	TRUE
cg00410419	chr13	0	TRUE
cg00410576	chr15	0.532133	TRUE
cg00411072	chr17	0.574406	TRUE
cg00411097	chr7	0.660154	TRUE
cg00411697	chr11	0.703426	TRUE
cg00412772	chr19	0.438104	TRUE
cg00413089	chr7	0.435409	TRUE
cg00413617	chr11	0.27263	TRUE
cg00413838	chr8	1	TRUE
cg00414041	chr6	1	TRUE
cg00414093	chr16	1	TRUE
cg00415011	chr8	0.796855	TRUE
cg00415333	chr6	1	TRUE
cg00415424	chr2	1	TRUE
cg00415497	chr22	0	TRUE
cg00415582	chr6	0	TRUE
cg00415704	chr15	0.71925	TRUE
cg00415978	chr4	0.554473	TRUE
cg00415993	chr5	0.789729	TRUE
cg00416176	chr1	0	TRUE
cg00416386	chr2	0.786886	TRUE
cg00416492	chr6	0.193665	TRUE
cg00416645	chr2	0.728124	TRUE
cg00416882	chr18	0.412493	TRUE
cg00417094	chr1	1	TRUE
cg00417151	chr20	0.613568	TRUE
cg00417297	chr3	0.00020723	TRUE
cg00417304	chr11	0.214394	TRUE
cg00417421	chr20	0	TRUE
cg00417424	chr5	1	TRUE
cg00417823	chr16	1	TRUE
cg00418071	chr1	1	TRUE
cg00418146	chr1	0	TRUE
cg00418150	chr11	0.861928	TRUE
cg00418735	chr20	0.935171	TRUE
cg00419040	chr1	0	TRUE
cg00419159	chr10	1	TRUE
cg00419298	chr7	0.733784	TRUE
cg00419321	chr1	0.074334	TRUE
cg00419564	chr1	0.00732689	TRUE
cg00419604	chr2	0.509684	TRUE
cg00419702	chr22	0	FALSE
cg00420347	chr1	0.924568	TRUE
cg00420532	chr7	1	TRUE
cg00420568	chr9	0.465577	TRUE
cg00420715	chr8	0	TRUE
cg00420722	chr4	0.385013	TRUE
cg00420742	chr19	0.511899	TRUE
cg00420869	chr5	0.422324	TRUE
cg00420895	chr6	0.794122	TRUE
cg00420929	chr19	0.242878	TRUE
cg00420997	chr8	1	TRUE
cg00421089	chr17	0.167232	TRUE
cg00421221	chr2	0.65184	TRUE
cg00421335	chr2	0.0888369	TRUE
cg00421846	chr6	0.329924	TRUE
cg00422120	chr2	0	TRUE
cg00422248	chr19	0	TRUE
cg00422488	chr9	0.338459	TRUE
cg00422578	chr11	1	TRUE
cg00422638	chr10	0.355893	TRUE
cg00422913	chr17	0	TRUE
cg00423030	chr17	0	TRUE
cg00423114	chr1	1	TRUE
cg00423124	chr13	0	TRUE
cg00423597	chr1	0.88205	TRUE
cg00423655	chr3	0.47592	TRUE
cg00423729	chr5	0.943336	TRUE
cg00423811	chr7	1	TRUE
cg00423871	chr19	0.820441	TRUE
cg00423969	chr2	1	TRUE
cg00424169	chr13	0.0607269	TRUE
cg00424946	chr16	0	TRUE
cg00424967	chr6	0.68061	TRUE
cg00425217	chr19	0.436305	TRUE
cg00425431	chr15	0.103922	TRUE
cg00425710	chr16	0.777585	TRUE
cg00425792	chr17	0	TRUE
cg00425988	chr8	0	TRUE
cg00426056	chr6	0	TRUE
cg00426182	chr6	0.0282857	TRUE
cg00426377	chr1	0.917355	TRUE
cg00426498	chr17	0.365177	TRUE
cg00426517	chr4	0	TRUE
cg00426822	chr1	0.363539	TRUE
cg00426963	chr9	0.283885	TRUE
cg00427086	chr15	0.725751	TRUE
cg00427635	chr15	1	TRUE
cg00428296	chr1	0.433342	TRUE
cg00428568	chr11	0.572835	TRUE
cg00428598	chr17	0.251571	TRUE
cg00429683	chr17	0.918385	TRUE
cg00429706	chr7	0.0375525	TRUE
cg00430036	chr9	0.432205	TRUE
cg00430080	chr11	0.347018	TRUE
cg00430287	chr6	0.935228	TRUE
cg00430888	chr4	0.303198	TRUE
cg00430945	chr19	0.0914264	TRUE
cg00431050	chr10	0	TRUE
cg00431114	chr20	0.278125	TRUE
cg00431324	chr16	0.105986	TRUE
cg00431447	chr16	0	TRUE
cg00431565	chr19	0	TRUE
cg00431813	chr7	0.713615	TRUE
cg00431837	chr6	0	TRUE
cg00432937	chr7	0.847594	TRUE
cg00432979	chr13	0.0968527	TRUE
cg00433284	chr17	0.144016	TRUE
cg00433861	chr18	0.674084	TRUE
cg00434573	chr19	0.197091	TRUE
cg00435006	chr16	0	TRUE
cg00435063	chr7	1	TRUE
cg00435305	chr10	0	TRUE
cg00435526	chr11	0.0488311	TRUE
cg00435528	chr7	0.989792	TRUE
cg00436174	chr2	0	TRUE
cg00436254	chr2	0.080288	TRUE
cg00436301	chr6	0.0998345	TRUE
cg00436603	chr10	0.622185	TRUE
cg00437124	chr6	0.972246	TRUE
cg00437411	chr15	1	TRUE
cg00439089	chr17	0.749178	TRUE
cg00439384	chr3	0.367054	TRUE
cg00439658	chr17	0	TRUE
cg00439790	chr12	0.221928	TRUE
cg00441382	chr15	0	TRUE
cg00441898	chr16	0.00460918	TRUE
cg00442112	chr4	0.0188014	TRUE
cg00442430	chr19	0.0844403	TRUE
cg00442931	chr3	0.217489	TRUE
cg00443645	chr14	0	TRUE
cg00443869	chr5	0.00180623	TRUE
cg00443946	chr16	1	TRUE
cg00444019	chr10	0	TRUE
cg00444059	chr16	0.142917	TRUE
cg00444390	chr11	1	TRUE
cg00445232	chr15	0.243293	TRUE
cg00445405	chr2	0.18474	TRUE
cg00445443	chr7	0.320989	TRUE
cg00445475	chr9	0.231833	TRUE
cg00445566	chr5	0.0322261	TRUE
cg00446211	chr6	0	TRUE
cg00446235	chr1	0.0154907	TRUE
cg00446697	chr11	0.653297	TRUE
cg00446966	chr19	0	TRUE
cg00447208	chr17	0.558461	TRUE
cg00447970	chr17	0.0238664	TRUE
cg00448560	chr16	0.34545	TRUE
cg00448659	chr7	0.61288	TRUE
cg00448720	chr13	0.338127	TRUE
cg00448761	chr19	0	TRUE
cg00448814	chr6	0.410976	TRUE
cg00448868	chr16	0.429003	TRUE
cg00448875	chr3	0.87226	TRUE
cg00449000	chr9	0.234259	TRUE
cg00449189	chr22	0.744976	TRUE
cg00449728	chr18	0.462245	TRUE
cg00449767	chr19	0.0267199	TRUE
cg00449941	chr17	0.00980121	TRUE
cg00450015	chr2	0.753684	TRUE
cg00450475	chr10	0.0100845	TRUE
cg00450695	chr19	0.697599	TRUE
cg00450784	chr12	0.227592	TRUE
cg00450990	chr2	0.858668	TRUE
cg00451039	chr1	0	TRUE
cg00451105	chr13	0.702582	TRUE
cg00451635	chr16	0.437491	TRUE
cg00452039	chr7	0	TRUE
cg00452257	chr19	0.0144856	TRUE
cg00453193	chr7	0	TRUE
cg00453202	chr16	0.148501	TRUE
cg00453258	chr10	1	TRUE
cg00453374	chr7	0.123818	TRUE
cg00453864	chr19	1	TRUE
cg00454305	chr16	0	TRUE
cg00454734	chr7	1	TRUE
cg00454997	chr1	0.0836347	TRUE
cg00455402	chr19	0.080592	TRUE
cg00455452	chr11	0	TRUE
cg00455796	chr19	0.792628	TRUE
cg00456216	chr1	0.833476	TRUE
cg00456299	chr1	0	TRUE
cg00456582	chr6	0	TRUE
cg00456672	chr15	0.792964	TRUE
cg00456774	chr19	0.564695	TRUE
cg00457155	chr11	0.535421	TRUE
cg00457195	chr20	0.65101	TRUE
cg00457403	chr3	0.189994	TRUE
cg00457913	chr6	0	TRUE
cg00458337	chr17	0.206423	TRUE
cg00458449	chr2	0.742392	TRUE
cg00459623	chr2	0.758714	TRUE
cg00459816	chr17	0.524854	TRUE
cg00459909	chr2	0.883867	TRUE
cg00459953	chr20	0	TRUE
cg00459975	chr8	0.000641268	TRUE
cg00460436	chr16	0.390282	TRUE
cg00460795	chr2	0.359084	TRUE
cg00460983	chr10	0.909952	TRUE
cg00462107	chr5	0.89602	TRUE
cg00462311	chr14	0	TRUE
cg00462525	chr2	0	TRUE
cg00462700	chr10	0.892128	TRUE
cg00462994	chr17	0	TRUE
cg00463202	chr13	0.854548	TRUE
cg00463367	chr10	0.890798	TRUE
cg00463594	chr17	0.0442024	TRUE
cg00463732	chr17	1	TRUE
cg00463848	chr12	0.876848	TRUE
cg00463859	chr1	0	TRUE
cg00464946	chr1	1	TRUE
cg00465073	chr18	0.805352	TRUE
cg00465247	chr13	0.234548	TRUE
cg00465250	chr2	0	TRUE
cg00465284	chr2	0	TRUE
cg00465319	chr3	1	TRUE
cg00466116	chr1	1	TRUE
cg00466158	chr9	0.115542	TRUE
cg00466249	chr17	0.354734	TRUE
cg00466301	chr20	0	TRUE
cg00466334	chr1	0.961832	TRUE
cg00466425	chr6	0.471593	TRUE
cg00466436	chr20	1	TRUE
cg00466492	chr19	0.0893539	TRUE
cg00466544	chr14	0.435643	TRUE
cg00466839	chr4	0.850503	TRUE
cg00467326	chr19	0	TRUE
cg00468146	chr6	0	TRUE
cg00468380	chr8	0.323262	TRUE
cg00468400	chr8	1	TRUE
cg00469635	chr11	0	TRUE
cg00469771	chr17	0.0962632	TRUE
cg00470051	chr6	0.784823	TRUE
cg00470277	chr7	0.771909	TRUE
cg00471000	chr20	1	TRUE
cg00471059	chr5	0.973	TRUE
cg00471141	chr8	0.415073	TRUE
cg00471368	chr16	1	TRUE
cg00471645	chr2	0.203842	TRUE
cg00472277	chr11	0	TRUE
cg00472281	chr5	0.416235	TRUE
cg00472292	chr4	0	TRUE
cg00472758	chr16	1	TRUE
cg00472814	chr21	0	TRUE
cg00473031	chr19	0.0250847	TRUE
cg00473167	chr3	0.227065	TRUE
cg00473416	chr3	0.113486	TRUE
cg00473462	chr5	0.171528	TRUE
cg00473597	chr19	0.28304	TRUE
cg00474004	chr9	1	TRUE
cg00474209	chr6	0	TRUE
cg00474218	chr15	0.32807	TRUE
cg00474328	chr6	0.648337	TRUE
cg00474696	chr2	0.485218	TRUE
cg00475322	chr7	0.0146185	TRUE
cg00475509	chr3	0.0501767	TRUE
cg00475815	chr3	0	TRUE
cg00477086	chr2	1	TRUE
cg00477978	chr11	0.579225	TRUE
cg00478246	chr2	0	TRUE
cg00478361	chr1	0.215188	TRUE
cg00478442	chr6	0	TRUE
cg00478479	chr19	0.297544	TRUE
cg00478601	chr2	1	TRUE
cg00478851	chr11	0.101638	TRUE
cg00479411	chr11	0.648672	TRUE
cg00479986	chr19	0.10355	TRUE
cg00480115	chr19	0.192094	TRUE
cg00480209	chr17	0	TRUE
cg00480231	chr2	1	TRUE
cg00480331	chr3	0	TRUE
cg00480381	chr16	0.875775	TRUE
cg00481159	chr12	0.977444	TRUE
cg00481350	chr4	0.450752	TRUE
cg00481600	chr15	0.184253	TRUE
cg00481629	chr22	0.231802	TRUE
cg00481644	chr15	0	TRUE
cg00481725	chr15	0.239887	TRUE
cg00481951	chr3	0.34959	TRUE
cg00482020	chr16	0.239828	TRUE
cg00483154	chr5	0	TRUE
cg00483217	chr2	1	TRUE
cg00483304	chr2	0.723767	TRUE
cg00483503	chr17	0	TRUE
cg00483562	chr5	0	TRUE
cg00483893	chr11	0.931934	TRUE
cg00483990	chr17	0	TRUE
cg00484396	chr16	0.219026	TRUE
cg00485194	chr3	0	TRUE
cg00485201	chr10	0.922752	TRUE
cg00485296	chr16	0	TRUE
cg00485748	chr20	0.909851	TRUE
cg00486113	chr6	0.667978	TRUE
cg00486143	chr7	0.173857	TRUE
cg00486564	chr2	0	TRUE
cg00487159	chr16	0	TRUE
cg00487506	chr8	0.68021	TRUE
cg00487870	chr8	0.0331752	TRUE
cg00488514	chr22	0.424344	TRUE
cg00488575	chr15	0.791219	TRUE
cg00488718	chr4	0	TRUE
cg00488747	chr16	0.318912	TRUE
cg00489408	chr16	0	TRUE
cg00489652	chr12	0.118962	TRUE
cg00489660	chr11	0.452831	TRUE
cg00490583	chr16	0.761205	TRUE
cg00490655	chr2	0	TRUE
cg00491404	chr1	1	TRUE
cg00491412	chr2	0.125891	TRUE
cg00491548	chr19	0.0170302	TRUE
cg00491603	chr19	0.978108	TRUE
cg00491839	chr19	0	TRUE
cg00491963	chr11	0	TRUE
cg00492574	chr9	0.0848415	TRUE
cg00492868	chr19	0.0497549	TRUE
cg00492873	chr1	0.184264	TRUE
cg00493314	chr2	0.857033	TRUE
cg00493400	chr2	0.198174	TRUE
cg00493422	chr4	0.76702	TRUE
cg00493831	chr1	0	TRUE
cg00494665	chr12	0	TRUE
cg00495415	chr12	0	TRUE
cg00495436	chr3	0.15793	TRUE
cg00495442	chr20	0.10467	TRUE
cg00495503	chr13	0.109603	TRUE
cg00495658	chr10	0.99386	TRUE
cg00495693	chr6	0.998863	TRUE
cg00495988	chr2	0.266562	TRUE
cg00496004	chr11	0	TRUE
cg00496026	chr10	0.253799	TRUE
cg00496170	chr14	0	TRUE
cg00496272	chr16	0.213249	TRUE
cg00496462	chr7	0.918897	TRUE
cg00496504	chr3	1	TRUE
cg00496967	chr17	0.710406	TRUE
cg00497078	chr14	0.446038	TRUE
cg00497251	chr2	0.426265	TRUE
cg00497554	chr2	0	TRUE
cg00497630	chr17	0	TRUE
cg00497735	chr16	0.920307	TRUE
cg00497905	chr11	0.565023	TRUE
cg00498010	chr7	0.549022	TRUE
cg00498211	chr2	0	TRUE
cg00498289	chr2	0.68135	TRUE
cg00498305	chr10	0.499692	TRUE
cg00498360	chr17	0.54542	TRUE
cg00498804	chr11	0.908706	TRUE
cg00499210	chr11	0.00247031	TRUE
cg00499277	chr14	0.932008	TRUE
cg00499289	chr2	0.0393547	TRUE
cg00499539	chr2	0.87015	TRUE
cg00499700	chr5	0.574066	TRUE
cg00499723	chr12	0	TRUE
cg00499726	chr17	0.151883	TRUE
cg00499822	chr10	1	TRUE
cg00499837	chr11	1	TRUE
cg00500227	chr10	0.956903	TRUE
cg00500428	chr16	0.192111	TRUE
cg00500481	chr6	0	TRUE
cg00500507	chr22	1	TRUE
cg00500522	chr12	0	TRUE
cg00500936	chr12	0.0414964	TRUE
cg00501356	chr22	0.743631	TRUE
cg00501366	chr17	0.7723	TRUE
cg00501467	chr6	0.371333	TRUE
cg00501622	chr9	0.851598	TRUE
cg00501628	chr12	0	TRUE
cg00501711	chr20	0.555887	TRUE
cg00501876	chr3	0	TRUE
cg00501904	chr1	0.886222	TRUE
cg00501919	chr6	0.997378	TRUE
cg00502017	chr15	1	TRUE
cg00502062	chr1	0.676037	TRUE
cg00502099	chr11	0.35839	TRUE
cg00502190	chr1	0.468828	TRUE
cg00502442	chr6	0	TRUE
cg00502444	chr7	1	TRUE
cg00502576	chr13	1	TRUE
cg00502597	chr1	1	TRUE
cg00502932	chr1	0	TRUE
cg00502963	chr1	0	TRUE
cg00503298	chr1	0.515122	TRUE
cg00503840	chr7	0	TRUE
cg00504034	chr13	0	TRUE
cg00504410	chr16	0.848026	TRUE
cg00504595	chr13	0.895394	TRUE
cg00504782	chr1	0.86079	TRUE
cg00505277	chr19	0	TRUE
cg00505318	chr3	0.209371	TRUE
cg00505502	chr9	0	TRUE
cg00506247	chr5	0	TRUE
cg00506866	chr2	0.102081	TRUE
cg00506886	chr19	1	TRUE
cg00507945	chr5	0.63659	TRUE
cg00508526	chr4	0.315148	TRUE
cg00508697	chr9	0.108731	TRUE
cg00508855	chr5	0	TRUE
cg00508975	chr3	0	TRUE
cg00509136	chr19	0.0953196	TRUE
cg00509616	chr15	0.756692	TRUE
cg00509670	chr14	0.614441	TRUE
cg00509772	chr20	0.311235	TRUE
cg00509996	chr4	0.536577	TRUE
cg00510160	chr12	1	TRUE
cg00510331	chr3	0.281999	TRUE
cg00510360	chr3	0	TRUE
cg00510437	chr12	0.398581	TRUE
cg00510447	chr16	0	TRUE
cg00510787	chr6	0.311783	TRUE
cg00510870	chr8	0.182416	TRUE
cg00511334	chr16	0.16689	TRUE
cg00511475	chr16	0.166361	TRUE
cg00511674	chr16	0	TRUE
cg00512279	chr10	0.247117	TRUE
cg00512280	chr19	0	TRUE
cg00512374	chr17	0	TRUE
cg00512454	chr6	1	TRUE
cg00512726	chr15	0	TRUE
cg00513060	chr19	0	TRUE
cg00513169	chr10	1	TRUE
cg00513288	chr19	0.924315	TRUE
cg00513467	chr9	0.309708	TRUE
cg00514407	chr2	0.0184437	TRUE
cg00514413	chr19	0	TRUE
cg00514486	chr3	0.951241	TRUE
cg00514575	chr5	0	FALSE
cg00514609	chr11	0	TRUE
cg00514628	chr22	0	TRUE
cg00514713	chr7	1	TRUE
cg00515455	chr6	1	TRUE
cg00516067	chr20	0	TRUE
cg00516481	chr21	0	TRUE
cg00516513	chr4	0	TRUE
cg00516639	chr7	0	TRUE
cg00516678	chr7	0.366656	TRUE
cg00516966	chr17	0.448197	TRUE
cg00517072	chr1	0.453854	TRUE
cg00517261	chr12	0.608313	TRUE
cg00517270	chr15	1	TRUE
cg00518190	chr1	0.254229	TRUE
cg00518266	chr6	0.206813	TRUE
cg00518276	chr11	1	TRUE
cg00518941	chr2	1	TRUE
cg00518989	chr22	0	TRUE
cg00519069	chr19	0.100348	TRUE
cg00519627	chr16	0.0122224	TRUE
cg00520380	chr22	0.316008	TRUE
cg00520612	chr3	0.239336	TRUE
cg00521239	chr8	0	TRUE
cg00521255	chr5	0.300822	TRUE
cg00521588	chr5	0	TRUE
cg00522034	chr3	0	TRUE
cg00522048	chr10	0.652629	TRUE
cg00522231	chr2	0.339263	TRUE
cg00522316	chr19	0	TRUE
cg00522579	chr18	1	TRUE
cg00522588	chr12	0.628363	TRUE
cg00522893	chr2	0	TRUE
cg00523012	chr19	0.0441517	TRUE
cg00523161	chr2	0.454824	TRUE
cg00523241	chr16	0.601977	TRUE
cg00523742	chr17	0.795525	TRUE
cg00524108	chr19	0.240306	TRUE
cg00524220	chr19	0.0660239	TRUE
cg00524443	chr17	0.837343	TRUE
cg00524706	chr12	1	TRUE
cg00524708	chr16	0.632614	TRUE
cg00524963	chr1	0.770106	TRUE
cg00525011	chr16	0	TRUE
cg00525681	chr13	0.688233	TRUE
cg00525823	chr18	0	TRUE
cg00526316	chr1	0	TRUE
cg00526772	chr10	1	TRUE
cg00527440	chr2	0	TRUE
cg00528052	chr1	0	TRUE
cg00528549	chr11	0	TRUE
cg00528572	chr11	0.687984	TRUE
cg00528616	chr16	0.774669	TRUE
cg00528967	chr13	0	TRUE
cg00529053	chr6	0.0582669	TRUE
cg00529946	chr2	0.0697863	TRUE
cg00530414	chr16	0.372291	TRUE
cg00530438	chr7	0.995278	TRUE
cg00530564	chr12	0.2743	TRUE
cg00530650	chr7	1	TRUE
cg00531745	chr6	0.52666	TRUE
cg00532335	chr10	0.746397	TRUE
cg00532411	chr1	0.294244	TRUE
cg00532449	chr1	0	TRUE
cg00532998	chr13	0.220384	TRUE
cg00533393	chr11	0	TRUE
cg00533407	chr7	0.918902	TRUE
cg00533891	chr10	0.0444339	TRUE
cg00533923	chr6	0	TRUE
cg00534163	chr1	1	TRUE
cg00534255	chr1	1	TRUE
cg00534274	chr4	0.836417	TRUE
cg00534318	chr3	0.416313	TRUE
cg00534655	chr5	0.146832	TRUE
cg00535027	chr4	0.283776	TRUE
cg00535618	chr1	1	TRUE
cg00535683	chr1	1	TRUE
cg00536366	chr22	0.263189	TRUE
cg00536792	chr6	0.938725	TRUE
cg00536910	chr8	0.495899	TRUE
cg00537673	chr6	0.205573	TRUE
cg00537837	chr16	0.280841	TRUE
cg00538147	chr10	0	TRUE
cg00538212	chr7	1	TRUE
cg00538381	chr2	0.266677	TRUE
cg00538923	chr17	0.635124	TRUE
cg00539154	chr1	0.886538	TRUE
cg00539347	chr22	0.420311	TRUE
cg00539716	chr2	0	TRUE
cg00540067	chr3	0.516069	TRUE
cg00540544	chr1	0	TRUE
cg00540558	chr19	0.184751	TRUE
cg00541303	chr1	0.7927	TRUE
cg00541476	chr8	0	FALSE
cg00541479	chr1	0.294683	TRUE
cg00541544	chr22	0.42909	TRUE
cg00542992	chr5	0.408867	TRUE
cg00543364	chr21	0.916257	TRUE
cg00543406	chr1	0	TRUE
cg00543769	chr5	0.914599	TRUE
cg00545462	chr20	1	TRUE
cg00545705	chr1	0.84336	TRUE
cg00545916	chr17	0.173087	TRUE
cg00546248	chr1	0.626205	TRUE
cg00546491	chr7	0.152837	TRUE
cg00546897	chr21	0.344245	TRUE
cg00546932	chr16	0.863211	TRUE
cg00547365	chr1	1	TRUE
cg00547441	chr7	0.187862	TRUE
cg00547484	chr1	0.624708	TRUE
cg00548098	chr16	0.939242	TRUE
cg00548143	chr1	0	TRUE
cg00548268	chr7	0.00955798	TRUE
cg00548708	chr17	0	TRUE
cg00548822	chr11	0.14392	TRUE
cg00548911	chr17	0.874549	TRUE
cg00549064	chr16	0.03001	TRUE
cg00549412	chr21	0.252549	TRUE
cg00549450	chr10	1	TRUE
cg00549451	chr1	0	TRUE
cg00549561	chr16	1	TRUE
cg00549601	chr12	0.377747	TRUE
cg00549896	chr2	0.195818	TRUE
cg00549972	chr6	1	TRUE
cg00550340	chr17	0.0707352	TRUE
[truncated: 76,466 more rows]

## Sheet: Denisovan (PC-guided Clocks)
Table S6: Methylation values of target sites extracted from archaic hominin DNAm maps
Site	Chromosome	Beta Value	Matched
cg00000292	chr16	0.0928201	TRUE
cg00000714	chr19	0.206395	TRUE
cg00001099	chr8	0.51837	TRUE
cg00001446	chr1	0.70507	TRUE
cg00001747	chr2	0	TRUE
cg00002116	chr17	0	TRUE
cg00002224	chr8	0	TRUE
cg00002426	chr3	0.23432	TRUE
cg00002646	chr1	0.313156	TRUE
cg00002660	chr12	0	TRUE
cg00002719	chr1	0.454685	TRUE
cg00002810	chr1	0	TRUE
cg00003091	chr4	0.0439347	TRUE
cg00003287	chr1	0.965279	TRUE
cg00003345	chr1	0.935034	TRUE
cg00003529	chr3	1	TRUE
cg00003578	chr1	0.134348	TRUE
cg00003625	chr17	0.12432	TRUE
cg00003994	chr7	0	TRUE
cg00004429	chr9	1	TRUE
cg00004608	chr6	0.426018	TRUE
cg00004806	chr6	1	TRUE
cg00005072	chr16	1	TRUE
cg00005306	chr16	0	TRUE
cg00005619	chr11	0.577661	TRUE
cg00005849	chr2	1	TRUE
cg00006081	chr10	0	TRUE
cg00006459	chr4	1	TRUE
cg00007076	chr8	0	TRUE
cg00007221	chr1	0.41922	TRUE
cg00007981	chr11	0	TRUE
cg00008629	chr9	0.344118	TRUE
cg00008647	chr1	0	TRUE
cg00008665	chr3	0.352436	TRUE
cg00008695	chr8	1	TRUE
cg00008713	chr18	0	TRUE
cg00009407	chr14	0	TRUE
cg00010654	chr1	0.0295542	TRUE
cg00010853	chr6	0.288365	TRUE
cg00011203	chr1	0.710122	TRUE
cg00011225	chr2	0	TRUE
cg00011482	chr14	0.114328	TRUE
cg00011740	chr16	0	TRUE
cg00011861	chr14	0.369948	TRUE
cg00011924	chr17	1	TRUE
cg00012199	chr14	0	TRUE
cg00012362	chr1	0.135636	TRUE
cg00012386	chr1	0	TRUE
cg00012397	chr11	0.305941	TRUE
cg00012469	chr7	0.0698331	TRUE
cg00013410	chr17	0	TRUE
cg00013618	chr22	1	TRUE
cg00013899	chr1	1	TRUE
cg00014085	chr2	0	TRUE
cg00014118	chr1	0	TRUE
cg00014194	chr9	0	TRUE
cg00014272	chr19	0.334063	TRUE
cg00015121	chr14	0.5364	TRUE
cg00015603	chr2	1	TRUE
cg00015770	chr4	0	TRUE
cg00016223	chr6	0	TRUE
cg00016783	chr2	1	TRUE
cg00016913	chr17	0.623303	TRUE
cg00017441	chr19	0	FALSE
cg00017826	chr2	0.926776	TRUE
cg00017842	chr2	1	TRUE
cg00017931	chr6	1	TRUE
cg00018606	chr2	0.377812	TRUE
cg00019118	chr12	0.516135	TRUE
cg00019137	chr19	0	TRUE
cg00019759	chr1	0	TRUE
cg00020348	chr7	1	TRUE
cg00020474	chr1	0.69933	TRUE
cg00021030	chr17	0.680481	TRUE
cg00021123	chr1	0.406692	TRUE
cg00021237	chr8	0	TRUE
cg00021275	chr2	0.722775	TRUE
cg00021325	chr14	0	TRUE
cg00021527	chr17	0	TRUE
cg00021855	chr8	0.640579	TRUE
cg00022235	chr16	0.698655	TRUE
cg00022866	chr11	0.148657	TRUE
cg00022911	chr19	0	TRUE
cg00023001	chr17	0	TRUE
cg00024046	chr2	1	TRUE
cg00024086	chr7	0	TRUE
cg00024404	chr5	0.460612	TRUE
cg00024416	chr22	1	TRUE
cg00024471	chr3	0.146076	TRUE
cg00024472	chr17	0	TRUE
cg00024812	chr2	0.316468	TRUE
cg00024967	chr3	0.607393	TRUE
cg00024989	chr19	0.26935	TRUE
cg00025138	chr14	0	TRUE
cg00025211	chr1	0	TRUE
cg00025405	chr5	0.554753	TRUE
cg00025591	chr21	0.994705	TRUE
cg00025626	chr2	1	TRUE
cg00025991	chr10	0.825682	TRUE
cg00026290	chr4	1	TRUE
cg00026412	chr10	1	TRUE
cg00026474	chr8	0.21903	TRUE
cg00026909	chr1	0.459549	TRUE
cg00027083	chr18	0	TRUE
cg00027466	chr1	0.586406	TRUE
cg00027674	chr11	0.469889	TRUE
cg00028022	chr1	0.851276	TRUE
cg00028135	chr3	0.399018	TRUE
cg00028184	chr1	0.292365	TRUE
cg00028507	chr1	0.980406	TRUE
cg00028935	chr3	0.0288751	TRUE
cg00029246	chr7	1	TRUE
cg00029353	chr12	0	TRUE
cg00029397	chr12	0	TRUE
cg00029521	chr6	1	TRUE
cg00030047	chr1	0.00943096	TRUE
cg00030604	chr1	1	TRUE
cg00030816	chr1	0	TRUE
cg00031162	chr17	0.651102	TRUE
cg00031256	chr6	1	TRUE
cg00031277	chr4	0.739819	TRUE
cg00031708	chr7	0.813864	TRUE
cg00031896	chr12	0.417774	TRUE
cg00032227	chr17	0	TRUE
cg00032609	chr20	0.352894	TRUE
cg00032756	chr12	0.176346	TRUE
cg00033155	chr2	1	TRUE
cg00033773	chr19	0.29388	TRUE
cg00033834	chr10	1	TRUE
cg00034019	chr6	0.115092	TRUE
cg00034039	chr9	0	TRUE
cg00034769	chr14	0.418328	TRUE
cg00035197	chr16	0.917212	TRUE
cg00035623	chr19	0.415527	TRUE
cg00035636	chr13	0.00802322	TRUE
cg00035969	chr1	1	TRUE
cg00036011	chr6	0	TRUE
cg00036110	chr1	1	TRUE
cg00036347	chr1	0	TRUE
cg00036871	chr2	0.0612929	TRUE
cg00036976	chr16	0.301828	TRUE
cg00037388	chr2	0	TRUE
cg00038167	chr19	0.811674	TRUE
cg00038675	chr1	0.818066	TRUE
cg00038736	chr19	0.0857207	TRUE
cg00039057	chr22	0.445472	TRUE
cg00039129	chr6	0.861656	TRUE
cg00039480	chr17	1	TRUE
cg00039864	chr5	1	TRUE
cg00040008	chr4	0	TRUE
cg00040367	chr1	0	TRUE
cg00040575	chr22	0.325122	TRUE
cg00040708	chr3	1	TRUE
cg00040861	chr19	0.0361268	TRUE
cg00040873	chr16	0	TRUE
cg00041328	chr17	0	TRUE
cg00041575	chr11	0.141896	TRUE
cg00041872	chr1	0.100573	TRUE
cg00041989	chr17	0.676659	TRUE
cg00042059	chr2	1	TRUE
cg00042341	chr2	0	TRUE
cg00042914	chr18	0.382107	TRUE
cg00043095	chr2	0.08448	TRUE
cg00043364	chr5	0	FALSE
cg00043564	chr7	0.445537	TRUE
cg00043599	chr1	0.137648	TRUE
cg00043788	chr20	0.127542	TRUE
cg00044050	chr16	0.0619743	TRUE
cg00044245	chr6	0.0407021	TRUE
cg00044372	chr16	1	TRUE
cg00044665	chr16	0.239003	TRUE
cg00044729	chr22	0.759172	TRUE
cg00045114	chr1	0.928028	TRUE
cg00045275	chr1	0.292053	TRUE
cg00045900	chr8	1	TRUE
cg00045902	chr10	0	TRUE
cg00045910	chr10	0.940467	TRUE
cg00046041	chr16	0	TRUE
cg00046156	chr5	1	TRUE
cg00046744	chr12	0.191109	TRUE
cg00046815	chr12	0.0758732	TRUE
cg00047287	chr22	0	TRUE
cg00047469	chr9	0	TRUE
cg00047694	chr16	0.319601	TRUE
cg00048759	chr7	0.0814042	TRUE
cg00049323	chr5	0.137687	TRUE
cg00049440	chr9	0.148514	TRUE
cg00049595	chr6	0.545163	TRUE
cg00049729	chr5	0.0344832	TRUE
cg00050152	chr5	0.404368	TRUE
cg00050375	chr6	0.929151	TRUE
cg00050792	chr13	0.665701	TRUE
cg00051662	chr10	0.221996	TRUE
cg00051782	chr3	0	TRUE
cg00052290	chr10	0	TRUE
cg00052422	chr3	0	TRUE
cg00053851	chr1	0.695549	TRUE
cg00054301	chr16	0.697554	TRUE
cg00054706	chr2	0.26984	TRUE
cg00054774	chr21	0.462904	TRUE
cg00055073	chr2	0.617387	TRUE
cg00055292	chr7	0.671712	TRUE
cg00055341	chr2	0.786268	TRUE
cg00055529	chr17	0.110298	TRUE
cg00055555	chr10	0.308834	TRUE
cg00055557	chr20	0	TRUE
cg00056202	chr8	0.140335	TRUE
cg00056257	chr3	0.241405	TRUE
cg00056497	chr10	0.186377	TRUE
cg00056624	chr3	0	TRUE
cg00056628	chr17	0	TRUE
cg00056676	chr5	0	TRUE
cg00056767	chr13	0.268833	TRUE
cg00057393	chr15	0	TRUE
cg00057593	chr8	1	TRUE
cg00057700	chr10	0	TRUE
cg00057722	chr18	0.322278	TRUE
cg00058009	chr4	1	TRUE
cg00058515	chr2	1	TRUE
cg00058708	chr2	0.331357	TRUE
cg00058879	chr22	0	FALSE
cg00058938	chr19	0.069902	TRUE
cg00059225	chr5	0	FALSE
cg00059424	chr22	0	TRUE
cg00059652	chr17	0.445206	TRUE
cg00059740	chr7	0	TRUE
cg00059911	chr12	0	TRUE
cg00060320	chr3	0	TRUE
cg00060374	chr1	0.351373	TRUE
cg00060836	chr8	0.483439	TRUE
cg00060880	chr12	0	TRUE
cg00061306	chr17	0.742104	TRUE
cg00061635	chr17	0.999924	TRUE
cg00061860	chr15	0.672967	TRUE
cg00062245	chr17	0.0299936	TRUE
cg00062282	chr22	0.181203	TRUE
cg00062312	chr1	0	TRUE
cg00063111	chr3	0.153028	TRUE
cg00063174	chr2	0	TRUE
cg00063456	chr1	0.788673	TRUE
cg00063567	chr2	0	TRUE
cg00064950	chr17	0.00536834	TRUE
cg00065302	chr21	1	TRUE
cg00065408	chr12	0	TRUE
cg00065957	chr1	0.0989681	TRUE
cg00066239	chr17	0.209237	TRUE
cg00066663	chr17	0.458461	TRUE
cg00066816	chr5	0.234171	TRUE
cg00067018	chr12	0.201682	TRUE
cg00067102	chr1	0	TRUE
cg00067126	chr2	0.161842	TRUE
cg00067471	chr19	0.349206	TRUE
cg00067518	chr1	0.439254	TRUE
cg00067528	chr2	0.485392	TRUE
cg00067758	chr6	1	TRUE
cg00068102	chr2	1	TRUE
cg00068433	chr1	0.872879	TRUE
cg00069002	chr1	0	TRUE
cg00069261	chr16	0	TRUE
cg00070052	chr9	0.513821	TRUE
cg00070162	chr1	1	TRUE
cg00070680	chr7	0	TRUE
cg00070814	chr10	0	TRUE
cg00071265	chr20	0.182174	TRUE
cg00071360	chr20	0.201728	TRUE
cg00071442	chr14	0.0762709	TRUE
cg00071751	chr10	0	TRUE
cg00071887	chr15	0	TRUE
cg00071950	chr4	0.337925	TRUE
cg00071998	chr6	0	TRUE
cg00072216	chr4	0	TRUE
cg00072369	chr5	0.293286	TRUE
cg00072426	chr16	0.39386	TRUE
cg00073010	chr17	0	TRUE
cg00073090	chr19	0	TRUE
cg00073460	chr6	0.760455	TRUE
cg00073549	chr16	1	TRUE
cg00073794	chr2	0.877541	TRUE
cg00074365	chr2	0.963193	TRUE
cg00074818	chr8	0	TRUE
cg00076325	chr2	1	TRUE
cg00076543	chr6	0.495362	TRUE
cg00076645	chr5	0.207514	TRUE
cg00076998	chr3	0.112602	TRUE
cg00077877	chr8	1	TRUE
cg00077904	chr5	0.772253	TRUE
cg00078025	chr9	0.0792071	TRUE
cg00078194	chr11	0	TRUE
cg00078911	chr2	0.680623	TRUE
cg00078968	chr1	0	TRUE
cg00079219	chr12	0	TRUE
cg00079563	chr22	0.0997128	TRUE
cg00079598	chr11	1	TRUE
cg00080012	chr11	0.0883896	TRUE
cg00080972	chr5	0.272214	TRUE
cg00080987	chr3	0.948725	TRUE
cg00081105	chr3	1	TRUE
cg00081251	chr1	0	TRUE
cg00081439	chr10	1	TRUE
cg00081919	chr2	0.0434687	TRUE
cg00081935	chr12	0.31799	TRUE
cg00081975	chr17	0	FALSE
cg00082140	chr5	0.487945	TRUE
cg00082182	chr1	0.180297	TRUE
cg00082285	chr1	1	TRUE
cg00082426	chr2	0	TRUE
cg00082713	chr3	0	TRUE
cg00082897	chr22	0.627201	TRUE
cg00082939	chr10	1	TRUE
cg00083188	chr10	0.420689	TRUE
cg00083193	chr15	1	TRUE
cg00083206	chr6	0.348444	TRUE
cg00083262	chr1	0.764787	TRUE
cg00083359	chr8	0.775089	TRUE
cg00083616	chr19	1	TRUE
cg00083659	chr22	0.68271	TRUE
cg00084019	chr7	0.179397	TRUE
cg00084202	chr8	1	TRUE
cg00084347	chr12	0.672051	TRUE
cg00084432	chr13	0.800168	TRUE
cg00084687	chr7	0	TRUE
cg00085013	chr3	0.832139	TRUE
cg00085281	chr7	1	TRUE
cg00085370	chr5	1	TRUE
cg00085493	chr1	0.785632	TRUE
cg00086283	chr7	1	TRUE
cg00086809	chr16	0	TRUE
cg00087067	chr5	1	TRUE
cg00087244	chr7	0.491136	TRUE
cg00087273	chr1	0.784651	TRUE
cg00087884	chr1	0.685128	TRUE
cg00087963	chr16	1	TRUE
cg00087971	chr6	0.738188	TRUE
cg00088148	chr2	0.777107	TRUE
cg00088183	chr1	0	TRUE
cg00088299	chr4	0	TRUE
cg00088797	chr3	1	TRUE
cg00089486	chr3	0.227236	TRUE
cg00089528	chr5	0.488295	TRUE
cg00089550	chr11	0.0449334	TRUE
cg00089821	chr6	1	TRUE
cg00089823	chr5	0.464964	TRUE
cg00089915	chr1	0.288295	TRUE
cg00090431	chr2	0.158076	TRUE
cg00090674	chr22	0.459384	TRUE
cg00090737	chr10	0.311169	TRUE
cg00090787	chr15	0.353232	TRUE
cg00090936	chr3	0.526573	TRUE
cg00091004	chr1	0.0792071	TRUE
cg00091060	chr19	0.265123	TRUE
cg00091693	chr17	0.565092	TRUE
cg00092400	chr12	1	TRUE
cg00093095	chr17	0.513219	TRUE
cg00093099	chr18	0.270272	TRUE
cg00094036	chr12	0	TRUE
cg00094063	chr16	0	TRUE
cg00094412	chr6	0.386526	TRUE
cg00094518	chr7	0	TRUE
cg00094735	chr5	1	TRUE
cg00094851	chr2	0.319424	TRUE
cg00094898	chr16	0.350659	TRUE
cg00095259	chr18	1	TRUE
cg00095276	chr5	1	TRUE
cg00095431	chr2	1	TRUE
cg00095523	chr12	0.466879	TRUE
cg00095526	chr1	0.62525	TRUE
cg00095674	chr1	0	TRUE
cg00096536	chr4	0.394626	TRUE
cg00096810	chr5	0.84794	TRUE
cg00096922	chr7	0.374076	TRUE
cg00097450	chr17	0.413054	TRUE
cg00097452	chr1	0.300519	TRUE
cg00097573	chr1	0	TRUE
cg00097968	chr1	0.73159	TRUE
cg00098304	chr15	0.812472	TRUE
cg00098553	chr13	0	TRUE
cg00098814	chr15	0.0228166	TRUE
cg00099094	chr5	0.499991	TRUE
cg00099240	chr22	0.512779	TRUE
cg00099441	chr2	0.83218	TRUE
cg00099602	chr6	1	TRUE
cg00099835	chr2	0.64454	TRUE
cg00099976	chr13	0	TRUE
cg00100804	chr9	0.0568988	TRUE
cg00101154	chr16	0.582528	TRUE
cg00101453	chr22	0	TRUE
cg00101457	chr10	0.863887	TRUE
cg00101629	chr1	0.77569	TRUE
cg00101715	chr3	0.294343	TRUE
cg00101728	chr6	0.572216	TRUE
cg00101940	chr16	0.577279	TRUE
cg00102023	chr18	0	FALSE
cg00102166	chr1	0	TRUE
cg00102615	chr9	1	TRUE
cg00102731	chr20	0.584954	TRUE
cg00102920	chr6	0	TRUE
cg00102955	chr1	0.312138	TRUE
cg00103299	chr15	0.13347	TRUE
cg00103398	chr1	0.185059	TRUE
cg00103448	chr17	0.760473	TRUE
cg00103783	chr17	0	TRUE
cg00103785	chr1	0	TRUE
cg00104267	chr9	0.786135	TRUE
cg00105253	chr14	0.0873193	TRUE
cg00105640	chr1	0	TRUE
cg00106250	chr2	0	TRUE
cg00106499	chr7	0	TRUE
cg00106744	chr21	0	TRUE
cg00107046	chr1	1	TRUE
cg00107187	chr14	0.1583	TRUE
cg00107488	chr22	0.198388	TRUE
cg00107606	chr2	0.0651461	TRUE
cg00107630	chr9	0.60745	TRUE
cg00107632	chr4	0.08448	TRUE
cg00107682	chr15	0	TRUE
cg00107782	chr1	0.374398	TRUE
cg00108098	chr3	1	TRUE
cg00108277	chr3	0	TRUE
cg00108454	chr1	1	TRUE
cg00108715	chr3	0.388161	TRUE
cg00108873	chr9	1	TRUE
cg00109356	chr13	0	TRUE
cg00109703	chr20	0.694427	TRUE
cg00110578	chr6	0	TRUE
cg00110675	chr6	0	TRUE
cg00110688	chr12	0.0253451	TRUE
cg00110785	chr7	0.147065	TRUE
cg00110832	chr6	0	TRUE
cg00110917	chr7	0.150913	TRUE
cg00110982	chr7	0	TRUE
cg00111826	chr5	1	TRUE
cg00111893	chr6	0.633317	TRUE
cg00111948	chr1	0.0695668	TRUE
cg00112238	chr1	0.546503	TRUE
cg00112251	chr1	0.626909	TRUE
cg00112341	chr3	1	TRUE
cg00112517	chr17	0.00943096	TRUE
cg00112952	chr1	1	TRUE
cg00113315	chr1	1	TRUE
cg00113663	chr5	0.807501	TRUE
cg00113951	chr12	0.0790515	TRUE
cg00114008	chr1	0	TRUE
cg00114346	chr7	1	TRUE
cg00114478	chr8	1	TRUE
cg00114944	chr6	0	TRUE
cg00114966	chr1	0.496986	TRUE
cg00115458	chr6	0.906567	TRUE
cg00115567	chr6	0.515699	TRUE
cg00115629	chr3	0.294389	TRUE
cg00116092	chr1	0.32085	TRUE
cg00116234	chr9	0.744465	TRUE
cg00116315	chr6	0.831466	TRUE
cg00116766	chr16	1	TRUE
cg00116838	chr19	0	TRUE
cg00116946	chr5	0.447157	TRUE
cg00117005	chr6	0.556035	TRUE
cg00117172	chr1	0.0906317	TRUE
cg00117599	chr17	0.667496	TRUE
cg00118158	chr2	0.860141	TRUE
cg00118507	chr1	0.72451	TRUE
cg00118978	chr3	0.659544	TRUE
cg00119073	chr3	0.310693	TRUE
cg00119079	chr3	0.107968	TRUE
cg00119117	chr20	0	TRUE
cg00119127	chr7	0.628665	TRUE
cg00119314	chr17	0	TRUE
cg00119811	chr5	1	TRUE
cg00120473	chr4	0.574442	TRUE
cg00121158	chr9	0.263758	TRUE
cg00121339	chr16	0.867298	TRUE
cg00121634	chr3	0	TRUE
cg00121640	chr9	0	TRUE
cg00121876	chr6	0.941823	TRUE
cg00122406	chr8	0.87246	TRUE
cg00122659	chr1	1	TRUE
cg00122854	chr2	0.334649	TRUE
cg00123035	chr1	0	TRUE
cg00123055	chr8	0	TRUE
cg00124488	chr6	0	TRUE
cg00125306	chr17	0	TRUE
cg00125406	chr4	0	TRUE
cg00126034	chr17	0	TRUE
cg00126959	chr17	0	TRUE
cg00127047	chr5	0.210972	TRUE
cg00127150	chr22	0.272265	TRUE
cg00127214	chr14	0	TRUE
cg00127353	chr6	0.693714	TRUE
cg00127408	chr9	0.280162	TRUE
cg00127591	chr17	0	TRUE
cg00127781	chr3	0.423465	TRUE
cg00128386	chr16	0.267327	TRUE
cg00128482	chr8	1	TRUE
cg00128877	chr1	0.209959	TRUE
cg00129273	chr8	0.877985	TRUE
cg00129651	chr17	0	TRUE
cg00129827	chr6	0.797486	TRUE
cg00129981	chr16	0.473659	TRUE
cg00130039	chr13	0	TRUE
cg00130181	chr13	0.974779	TRUE
cg00130275	chr11	0.576935	TRUE
cg00131758	chr22	1	TRUE
cg00132108	chr5	0	TRUE
cg00132141	chr10	0.686543	TRUE
cg00133403	chr16	0.830784	TRUE
cg00133595	chr16	0	TRUE
cg00133624	chr12	1	TRUE
cg00133698	chr4	0	TRUE
cg00133909	chr15	0	TRUE
cg00134190	chr6	0	TRUE
cg00134210	chr10	0.704357	TRUE
cg00134295	chr12	1	TRUE
cg00134602	chr3	0.232672	TRUE
cg00134645	chr5	0	TRUE
cg00134776	chr3	0.116114	TRUE
cg00134787	chr17	1	TRUE
cg00135056	chr3	0.241112	TRUE
cg00135293	chr6	1	TRUE
cg00135815	chr13	0.0352664	TRUE
cg00135888	chr11	0.120613	TRUE
cg00136405	chr4	0.577353	TRUE
cg00136477	chr1	0.528308	TRUE
cg00136736	chr22	0	TRUE
cg00136968	chr7	0.982431	TRUE
cg00137209	chr3	0.19188	TRUE
cg00137828	chr10	0	TRUE
cg00138101	chr17	0.360135	TRUE
cg00138126	chr20	0.0337177	TRUE
cg00138710	chr2	1	TRUE
cg00139037	chr13	0.215085	TRUE
cg00139244	chr10	0	TRUE
cg00139681	chr7	1	TRUE
cg00139683	chr20	0.542771	TRUE
cg00140447	chr7	0.960746	TRUE
cg00140479	chr22	0	TRUE
cg00140501	chr8	0.0114935	TRUE
cg00140842	chr2	0	TRUE
cg00141162	chr3	1	TRUE
cg00141174	chr9	0.16123	TRUE
cg00142257	chr9	0	TRUE
cg00142266	chr15	0.813287	TRUE
cg00142670	chr6	0.142242	TRUE
cg00142925	chr11	0.0387817	TRUE
cg00143376	chr2	0.246768	TRUE
cg00143387	chr16	0.179121	TRUE
cg00145141	chr17	1	TRUE
cg00145352	chr17	0.575272	TRUE
cg00145904	chr1	0.523986	TRUE
cg00145961	chr15	1	TRUE
cg00146027	chr10	0.224525	TRUE
cg00146695	chr13	0	TRUE
cg00146698	chr4	0.0428378	TRUE
cg00147095	chr1	0.397941	TRUE
cg00147172	chr22	0.362185	TRUE
cg00147339	chr6	0	TRUE
cg00147638	chr1	1	TRUE
cg00147863	chr19	0.224378	TRUE
cg00148127	chr17	1	TRUE
cg00148325	chr17	1	TRUE
cg00148666	chr16	0	TRUE
cg00148825	chr4	0.450775	TRUE
cg00149213	chr1	0.74265	TRUE
cg00149976	chr3	0	TRUE
cg00150231	chr2	1	TRUE
cg00150785	chr20	1	TRUE
cg00151251	chr2	0.600263	TRUE
cg00151525	chr1	0	TRUE
cg00151607	chr16	0	TRUE
cg00151922	chr20	0.107129	TRUE
cg00152047	chr1	1	TRUE
cg00152175	chr16	0	FALSE
cg00152322	chr15	1	TRUE
cg00152799	chr18	0.524965	TRUE
cg00152942	chr16	0.106359	TRUE
cg00152946	chr10	0	TRUE
cg00153395	chr1	1	TRUE
cg00153707	chr9	1	TRUE
cg00153856	chr1	0	TRUE
cg00154888	chr12	0.532663	TRUE
cg00155485	chr12	0	TRUE
cg00155514	chr1	0	TRUE
cg00155535	chr12	1	TRUE
cg00155609	chr19	0	TRUE
cg00155879	chr10	0.0865306	TRUE
cg00156216	chr11	0	TRUE
cg00156230	chr7	0.794803	TRUE
cg00156427	chr11	0.743984	TRUE
cg00156551	chr8	0.742911	TRUE
cg00156744	chr5	0	TRUE
cg00156995	chr13	0.658737	TRUE
cg00157043	chr11	0.88383	TRUE
cg00157179	chr1	0.666936	TRUE
cg00157456	chr16	0.184766	TRUE
cg00157638	chr1	0.5912	TRUE
cg00157796	chr6	0	TRUE
cg00158122	chr10	0	TRUE
cg00158308	chr13	0.684011	TRUE
cg00158333	chr17	0	TRUE
cg00158683	chr3	0	TRUE
cg00159243	chr12	0.816182	TRUE
cg00160388	chr16	0.18071	TRUE
cg00160914	chr1	0.215004	TRUE
cg00161247	chr9	1	TRUE
cg00161556	chr11	0.532465	TRUE
cg00162064	chr1	1	TRUE
cg00162104	chr4	1	TRUE
cg00162206	chr2	0	TRUE
cg00162348	chr16	0	TRUE
cg00162401	chr6	0	TRUE
cg00162643	chr9	0.170846	TRUE
cg00162806	chr10	0.488136	TRUE
cg00162969	chr12	0.316468	TRUE
cg00163006	chr17	1	TRUE
cg00163546	chr18	0.927159	TRUE
cg00163702	chr16	0.998085	TRUE
cg00164235	chr4	0.133134	TRUE
cg00164898	chr22	0	TRUE
cg00164941	chr2	0.56823	TRUE
cg00165323	chr1	0	TRUE
cg00165535	chr1	0	TRUE
cg00165631	chr1	1	TRUE
cg00166216	chr3	0.207834	TRUE
cg00166372	chr3	0.179577	TRUE
cg00166722	chr3	0.677043	TRUE
cg00167076	chr3	0.436561	TRUE
cg00167491	chr5	0.192135	TRUE
cg00167504	chr7	0	TRUE
cg00167958	chr22	1	TRUE
cg00168009	chr3	0	TRUE
cg00168118	chr16	1	TRUE
cg00168205	chr12	0	TRUE
cg00168785	chr2	0.253212	TRUE
cg00168815	chr4	0	TRUE
cg00169354	chr20	0.835622	TRUE
cg00169419	chr4	0.430386	TRUE
cg00169617	chr3	0.262458	TRUE
cg00169725	chr5	0.153377	TRUE
cg00169737	chr12	0.547785	TRUE
cg00169776	chr1	0.687313	TRUE
cg00169897	chr16	1	TRUE
cg00170213	chr6	0.306024	TRUE
cg00170295	chr6	1	TRUE
cg00170438	chr20	0.198648	TRUE
cg00170564	chr12	0.0403929	TRUE
cg00170796	chr1	0.467781	TRUE
cg00171126	chr21	0	TRUE
cg00171154	chr12	0.201051	TRUE
cg00172270	chr12	0	TRUE
cg00172376	chr21	0.182416	TRUE
cg00172812	chr1	0.406261	TRUE
cg00172872	chr12	1	TRUE
cg00173010	chr7	0.0638664	TRUE
cg00173063	chr8	1	TRUE
cg00174421	chr8	0	TRUE
cg00174500	chr14	0.315613	TRUE
cg00174508	chr12	0.576699	TRUE
cg00174573	chr12	0.566501	TRUE
cg00174718	chr6	0.899503	TRUE
cg00174743	chr21	0.103838	TRUE
cg00174851	chr7	0.659873	TRUE
cg00174901	chr19	0	TRUE
cg00174992	chr2	1	TRUE
cg00175344	chr13	0	TRUE
cg00175823	chr12	0.494128	TRUE
cg00175844	chr8	0.959173	TRUE
cg00176210	chr8	0.901406	TRUE
cg00176638	chr1	0.00413748	TRUE
cg00177013	chr20	0	TRUE
cg00177127	chr1	0.919263	TRUE
cg00177875	chr11	1	TRUE
cg00177923	chr8	0.00683303	TRUE
cg00178356	chr13	0.484195	TRUE
cg00178511	chr3	0	TRUE
cg00178551	chr8	1	TRUE
cg00178790	chr18	0	TRUE
cg00178850	chr1	0.401628	TRUE
cg00178928	chr2	0.287103	TRUE
cg00179217	chr6	0.0455193	TRUE
cg00179374	chr7	0.89772	TRUE
cg00179940	chr12	0.394415	TRUE
cg00180012	chr6	0.0329311	TRUE
cg00180447	chr3	0.436226	TRUE
cg00180666	chr20	0	TRUE
cg00180762	chr12	0.0212378	TRUE
cg00181054	chr13	0	TRUE
cg00181432	chr3	0.655655	TRUE
cg00181834	chr10	0	TRUE
cg00181968	chr1	0	TRUE
cg00182294	chr11	0	TRUE
cg00182758	chr17	0.0926823	TRUE
cg00182893	chr6	1	TRUE
cg00183684	chr1	0	TRUE
cg00183888	chr7	0.774336	TRUE
cg00183916	chr17	0	TRUE
cg00184235	chr8	0	TRUE
cg00184452	chr1	0.366526	TRUE
cg00184457	chr8	1	TRUE
cg00184732	chr15	0.238329	TRUE
cg00184884	chr22	0	TRUE
cg00184893	chr17	0	TRUE
cg00185413	chr3	1	TRUE
cg00185839	chr11	0	TRUE
cg00186141	chr7	0	TRUE
cg00186499	chr20	0.794609	TRUE
cg00186701	chr8	0.447676	TRUE
cg00187059	chr6	0.343042	TRUE
cg00187120	chr7	0.709516	TRUE
cg00187380	chr12	0	TRUE
cg00187437	chr6	0.433694	TRUE
cg00187557	chr5	0.489855	TRUE
cg00187671	chr17	0	TRUE
cg00187692	chr13	1	TRUE
cg00187933	chr4	0.0352664	TRUE
cg00189366	chr10	0.420506	TRUE
cg00190355	chr5	1	TRUE
cg00191853	chr8	1	TRUE
cg00191882	chr17	0.133496	TRUE
cg00192220	chr16	0.593582	TRUE
cg00192275	chr10	1	TRUE
cg00192882	chr17	0.754754	TRUE
cg00194146	chr6	0	TRUE
cg00194780	chr17	1	TRUE
cg00196372	chr9	0	TRUE
cg00196414	chr2	0	TRUE
cg00196671	chr18	0	TRUE
cg00196787	chr17	0	TRUE
cg00196827	chr18	0	TRUE
cg00197026	chr6	0.657233	TRUE
cg00197058	chr17	0.67812	TRUE
cg00197373	chr5	1	TRUE
cg00197381	chr5	0.0106597	TRUE
cg00197641	chr14	0.267138	TRUE
cg00197993	chr6	0.799478	TRUE
cg00199048	chr17	0.203403	TRUE
cg00199091	chr6	1	TRUE
cg00200063	chr17	0	TRUE
cg00200164	chr6	0.281322	TRUE
cg00200803	chr20	0.574813	TRUE
cg00201185	chr12	0.1583	TRUE
cg00201234	chr3	0.892557	TRUE
cg00201296	chr2	0.503648	TRUE
cg00201670	chr21	0	TRUE
cg00201779	chr6	0.57273	TRUE
cg00202454	chr15	0.751148	TRUE
cg00202460	chr15	0.3565	TRUE
cg00202479	chr6	0.647067	TRUE
cg00202702	chr11	0	TRUE
cg00203035	chr16	0.0655402	TRUE
cg00203284	chr1	0	TRUE
cg00203456	chr6	0.227727	TRUE
cg00203915	chr7	0.651488	TRUE
cg00204262	chr19	0.308285	TRUE
cg00205658	chr7	0.541913	TRUE
cg00205756	chr16	1	TRUE
cg00206052	chr10	0.098541	TRUE
cg00206468	chr16	1	TRUE
cg00207428	chr16	0.221282	TRUE
cg00207534	chr16	0	TRUE
cg00207731	chr15	0	TRUE
cg00207873	chr16	1	TRUE
cg00208504	chr4	0.196071	TRUE
cg00208967	chr19	0.220092	TRUE
cg00209037	chr22	0	TRUE
cg00209923	chr15	1	TRUE
cg00210204	chr6	0	TRUE
cg00210249	chr10	0.647767	TRUE
cg00210473	chr6	0.499545	TRUE
cg00210562	chr15	0	TRUE
cg00210842	chr12	0	TRUE
cg00210856	chr5	0.932556	TRUE
cg00210994	chr3	0.392905	TRUE
cg00211115	chr11	0.163612	TRUE
cg00211630	chr11	0.255509	TRUE
cg00211661	chr11	0.924949	TRUE
cg00212470	chr1	1	TRUE
cg00212786	chr2	0.451441	TRUE
cg00212988	chr10	0.0783283	TRUE
cg00213004	chr1	0.080006	TRUE
cg00213052	chr18	0.712449	TRUE
cg00213142	chr3	0.990256	TRUE
cg00213295	chr17	1	TRUE
cg00213714	chr9	0.0777888	TRUE
cg00214044	chr13	1	TRUE
cg00214171	chr17	0.921298	TRUE
cg00214294	chr4	0.10211	TRUE
cg00215182	chr1	1	TRUE
cg00215801	chr6	0	TRUE
cg00215896	chr17	1	TRUE
cg00216361	chr3	1	TRUE
cg00216758	chr11	0	TRUE
cg00216831	chr16	0	TRUE
cg00216901	chr20	0.234067	TRUE
cg00217795	chr14	0.280273	TRUE
cg00218146	chr15	0	TRUE
cg00218404	chr18	1	TRUE
cg00218415	chr20	1	TRUE
cg00218770	chr20	0.966699	TRUE
cg00218893	chr17	0.330458	TRUE
cg00219169	chr10	0.0691008	TRUE
cg00219282	chr6	0.169387	TRUE
cg00219626	chr6	0.231884	TRUE
cg00220102	chr16	0.838059	TRUE
cg00220113	chr8	0.457201	TRUE
cg00220294	chr16	0.178609	TRUE
cg00220389	chr17	0	TRUE
cg00220455	chr11	0.596589	TRUE
cg00220492	chr15	0	TRUE
cg00221012	chr17	0.191988	TRUE
cg00221070	chr5	0	TRUE
cg00221382	chr16	0.0555747	TRUE
cg00221494	chr13	0	TRUE
cg00221668	chr11	0.474335	TRUE
cg00221718	chr3	0.897277	TRUE
cg00221969	chr16	0	TRUE
cg00222175	chr22	1	TRUE
cg00222291	chr16	0	TRUE
cg00222341	chr15	0.496994	TRUE
cg00222601	chr5	0	TRUE
cg00222690	chr6	0.153389	TRUE
cg00223135	chr15	1	TRUE
cg00223186	chr1	0.170122	TRUE
cg00223950	chr1	0	TRUE
cg00224083	chr4	0.378872	TRUE
cg00224471	chr5	1	TRUE
cg00224508	chr1	0	TRUE
cg00224807	chr2	0.438222	TRUE
cg00225070	chr15	0	TRUE
cg00225157	chr6	0.00536834	TRUE
cg00225623	chr13	0.562223	TRUE
cg00226831	chr15	1	TRUE
cg00226849	chr18	1	TRUE
cg00226931	chr11	0	TRUE
cg00227156	chr22	0.874444	TRUE
cg00227225	chr15	0	TRUE
cg00227781	chr17	0	TRUE
cg00228017	chr18	0.484194	TRUE
cg00228390	chr6	0.613481	TRUE
cg00228735	chr7	0.932751	TRUE
cg00229387	chr6	0.482007	TRUE
cg00230074	chr17	0.206928	TRUE
cg00230271	chr4	0	TRUE
cg00230368	chr6	0.333369	TRUE
cg00230700	chr4	0.0279815	TRUE
cg00231140	chr18	0	TRUE
cg00231192	chr4	0.838929	TRUE
cg00231405	chr17	0.00327762	TRUE
cg00231483	chr18	0.173895	TRUE
cg00231528	chr1	0.842531	TRUE
cg00231771	chr6	0.968862	TRUE
cg00231920	chr20	0	TRUE
cg00231945	chr21	1	TRUE
cg00232059	chr22	0.548494	TRUE
cg00232160	chr9	0.251436	TRUE
cg00232500	chr9	0.873118	TRUE
cg00232535	chr7	1	TRUE
cg00232827	chr5	0.87383	TRUE
cg00233028	chr11	0.731039	TRUE
cg00233307	chr19	0.107954	TRUE
cg00233565	chr5	0.808069	TRUE
cg00234261	chr7	0.597089	TRUE
cg00234321	chr3	0.909702	TRUE
cg00234613	chr4	0.958269	TRUE
cg00234616	chr2	0	TRUE
cg00234625	chr5	0.417532	TRUE
cg00235508	chr17	0.520559	TRUE
cg00235933	chr5	0	TRUE
cg00236576	chr17	0.0860457	TRUE
cg00236831	chr12	0	TRUE
cg00236832	chr17	0.117097	TRUE
cg00236919	chr4	0.077303	TRUE
cg00237010	chr12	0.0561664	TRUE
cg00237631	chr7	0	TRUE
cg00238213	chr7	0.595713	TRUE
cg00238295	chr10	1	TRUE
cg00238510	chr2	1	TRUE
cg00238662	chr6	0.670758	TRUE
cg00238770	chr12	0.135185	TRUE
cg00238848	chr11	0.69411	TRUE
cg00239025	chr2	1	TRUE
cg00239061	chr17	0	TRUE
cg00239353	chr16	0.653672	TRUE
cg00239657	chr5	1	TRUE
cg00239685	chr3	0.0314146	TRUE
cg00239835	chr11	0.615133	TRUE
cg00240007	chr12	0.238207	TRUE
cg00240432	chr7	0	TRUE
cg00240767	chr16	0.976049	TRUE
cg00240880	chr20	0.823415	TRUE
cg00241076	chr16	0.0950192	TRUE
cg00241281	chr14	0.554193	TRUE
cg00241355	chr12	0	TRUE
cg00241432	chr13	0.820611	TRUE
cg00241638	chr8	0.693746	TRUE
cg00241712	chr22	0	TRUE
cg00242035	chr11	0.500183	TRUE
cg00242098	chr1	1	TRUE
cg00242299	chr8	0.175024	TRUE
cg00242627	chr1	0	TRUE
cg00242839	chr10	0.336728	TRUE
cg00243272	chr22	1	TRUE
cg00243313	chr5	0	TRUE
cg00244001	chr10	0.742267	TRUE
cg00244308	chr2	0.077557	TRUE
cg00244776	chr6	0.122296	TRUE
cg00244983	chr10	0.336699	TRUE
cg00245454	chr4	1	TRUE
cg00245613	chr8	0.91454	TRUE
cg00245885	chr5	1	TRUE
cg00246301	chr2	1	TRUE
cg00246451	chr1	0	TRUE
cg00247334	chr3	0.444436	TRUE
cg00247489	chr1	0.246666	TRUE
cg00247535	chr3	1	TRUE
cg00247748	chr3	0.609819	TRUE
cg00248574	chr4	1	TRUE
cg00248804	chr17	0	TRUE
cg00248856	chr11	0.96196	TRUE
cg00249032	chr20	0.267939	TRUE
cg00249576	chr6	0.693064	TRUE
cg00250409	chr16	0.462104	TRUE
cg00250414	chr7	1	TRUE
cg00250483	chr1	0.84783	TRUE
cg00250743	chr10	1	TRUE
cg00251358	chr5	0.977778	TRUE
cg00251622	chr4	0.613553	TRUE
cg00251678	chr1	0.461472	TRUE
cg00251973	chr12	0.773633	TRUE
cg00252332	chr13	0	TRUE
cg00252422	chr1	0	TRUE
cg00252472	chr6	0.301018	TRUE
cg00252781	chr1	0.377711	TRUE
cg00252804	chr1	0.407298	TRUE
cg00252813	chr12	0	TRUE
cg00252814	chr7	1	TRUE
cg00253398	chr22	0.853735	TRUE
cg00253851	chr16	0.593888	TRUE
cg00254133	chr20	0	TRUE
cg00254886	chr5	0	TRUE
cg00255099	chr5	0.931057	TRUE
cg00255699	chr1	1	TRUE
cg00255919	chr5	0.383317	TRUE
cg00256046	chr1	0.633639	TRUE
cg00256074	chr16	0.548626	TRUE
cg00256166	chr15	0.354918	TRUE
cg00256281	chr22	0	TRUE
cg00256767	chr1	0	TRUE
cg00257202	chr4	0	TRUE
cg00257455	chr1	0.244456	TRUE
cg00257712	chr4	0.862396	TRUE
cg00258316	chr1	0.430069	TRUE
cg00258550	chr21	0.277819	TRUE
cg00258597	chr8	0	TRUE
cg00258873	chr6	0.37936	TRUE
cg00259019	chr2	0.459213	TRUE
cg00259279	chr1	0.874267	TRUE
cg00259549	chr8	0.54035	TRUE
cg00259834	chr3	0.412018	TRUE
cg00260116	chr7	0	TRUE
cg00260883	chr16	0.450918	TRUE
cg00261552	chr12	0	TRUE
cg00261569	chr3	0.338382	TRUE
cg00261781	chr2	0	TRUE
cg00262030	chr8	0.978383	TRUE
cg00262415	chr1	0.181358	TRUE
cg00262621	chr1	0	TRUE
cg00262776	chr12	0	TRUE
cg00263248	chr14	0.271428	TRUE
cg00263368	chr7	0.63688	TRUE
cg00264129	chr5	0.606743	TRUE
cg00264208	chr22	0	TRUE
cg00264419	chr8	0.809199	TRUE
cg00264441	chr11	0	TRUE
cg00265238	chr7	0	FALSE
cg00265277	chr9	0.511126	TRUE
cg00265415	chr1	0	TRUE
cg00265490	chr8	0.0443742	TRUE
cg00266009	chr8	0	TRUE
cg00266322	chr17	0	TRUE
cg00266920	chr18	0	TRUE
cg00267713	chr1	0	TRUE
cg00268009	chr4	0	TRUE
cg00268086	chr17	0.209337	TRUE
cg00268338	chr10	0	TRUE
cg00268518	chr11	0	TRUE
cg00268547	chr5	0.655565	TRUE
cg00269115	chr1	0	TRUE
cg00269643	chr7	0	TRUE
cg00269725	chr6	1	TRUE
cg00269817	chr8	1	TRUE
cg00269996	chr6	0.601664	TRUE
cg00270141	chr2	0.813104	TRUE
cg00270778	chr2	0	TRUE
cg00271311	chr11	0.951212	TRUE
cg00272971	chr10	0	TRUE
cg00273068	chr20	0	TRUE
cg00273449	chr2	0.293823	TRUE
cg00274279	chr6	0	TRUE
cg00274399	chr13	0	TRUE
cg00274587	chr6	0	TRUE
cg00274965	chr21	0.0352664	TRUE
cg00275232	chr19	0	TRUE
cg00276389	chr22	1	TRUE
cg00276797	chr10	0.310335	TRUE
cg00276799	chr11	0	TRUE
cg00276826	chr10	0.223359	TRUE
cg00277334	chr10	0.60806	TRUE
cg00277753	chr10	1	TRUE
cg00277898	chr6	0.219305	TRUE
cg00278329	chr16	0.129504	TRUE
cg00278366	chr12	0.655063	TRUE
cg00278692	chr10	0.0352664	TRUE
cg00280220	chr17	0.282985	TRUE
cg00280758	chr4	0.208169	TRUE
cg00280799	chr7	0.983406	TRUE
cg00280895	chr2	0.318337	TRUE
cg00281048	chr4	0.906476	TRUE
cg00281600	chr7	0	TRUE
cg00282195	chr2	0.686866	TRUE
cg00282244	chr7	0.468384	TRUE
cg00282347	chr1	0	TRUE
cg00282683	chr7	0	TRUE
cg00282953	chr5	0.567897	TRUE
cg00283535	chr8	0.701342	TRUE
cg00283986	chr2	0.731897	TRUE
cg00285294	chr7	1	TRUE
cg00285314	chr16	0.1583	TRUE
cg00285620	chr11	0.626199	TRUE
cg00286188	chr2	0.102035	TRUE
cg00287322	chr2	0	TRUE
cg00287477	chr4	1	TRUE
cg00287773	chr5	1	TRUE
cg00287974	chr7	0.0238419	TRUE
cg00288562	chr7	0	TRUE
cg00289081	chr22	0.0352664	TRUE
cg00289254	chr11	0.0964818	TRUE
cg00289503	chr20	0.369541	TRUE
cg00290028	chr13	0.0883838	TRUE
cg00290101	chr11	0.779367	TRUE
cg00290303	chr7	1	TRUE
cg00290483	chr17	0	TRUE
cg00290506	chr1	0	TRUE
cg00290607	chr11	0.15862	TRUE
cg00290758	chr10	0.486512	TRUE
cg00290994	chr1	0	TRUE
cg00291478	chr10	0.304852	TRUE
cg00291877	chr15	0.22923	TRUE
cg00292029	chr6	0.244227	TRUE
cg00292071	chr7	1	TRUE
cg00292636	chr1	0.975476	TRUE
cg00292664	chr10	0.189059	TRUE
cg00292669	chr1	0.505208	TRUE
cg00292701	chr4	0.00471076	TRUE
cg00292971	chr7	0.555066	TRUE
cg00292986	chr2	0	TRUE
cg00293060	chr12	1	TRUE
cg00293245	chr11	0.0231325	TRUE
cg00293409	chr3	0	TRUE
cg00293644	chr1	0.531411	TRUE
cg00294382	chr12	1	TRUE
cg00294940	chr1	0.728821	TRUE
cg00295259	chr2	0.550819	TRUE
cg00295293	chr8	0.341016	TRUE
cg00295308	chr10	1	TRUE
cg00295485	chr2	0.297072	TRUE
cg00295604	chr11	0.200507	TRUE
cg00295887	chr8	0.0291147	TRUE
cg00296182	chr10	0	TRUE
cg00296279	chr10	0	TRUE
cg00297584	chr12	0.204094	TRUE
cg00297600	chr8	0.792782	TRUE
cg00297950	chr1	0	TRUE
cg00298020	chr1	0	TRUE
cg00298065	chr19	0.268693	TRUE
cg00298481	chr11	0.0176332	TRUE
cg00298796	chr8	0	TRUE
cg00298910	chr2	0	TRUE
cg00299230	chr11	1	TRUE
cg00299511	chr11	1	TRUE
cg00299736	chr11	0.634913	TRUE
cg00299767	chr14	0.0528427	TRUE
cg00299820	chr1	1	TRUE
cg00299893	chr15	1	TRUE
cg00299943	chr22	1	TRUE
cg00300039	chr1	0	TRUE
cg00300637	chr5	0.799568	TRUE
cg00300672	chr2	0.540557	TRUE
cg00300908	chr15	0.300436	TRUE
cg00301660	chr8	0.1466	TRUE
cg00301879	chr4	0	FALSE
cg00302081	chr9	0.785616	TRUE
cg00302340	chr12	0.611186	TRUE
cg00302494	chr2	0	TRUE
cg00302793	chr4	0	TRUE
cg00303111	chr10	0.797568	TRUE
cg00303183	chr2	0.251995	TRUE
cg00303335	chr7	0.31362	TRUE
cg00303723	chr19	0.130937	TRUE
cg00303811	chr2	0.253487	TRUE
cg00303982	chr8	0	TRUE
cg00304072	chr15	0	TRUE
cg00304185	chr16	0	TRUE
cg00305629	chr9	0.356739	TRUE
cg00305740	chr7	0.242287	TRUE
cg00306298	chr2	0	TRUE
cg00306311	chr4	0.195512	TRUE
cg00306390	chr1	0.243647	TRUE
cg00306426	chr1	0.124905	TRUE
cg00306578	chr16	1	TRUE
cg00306951	chr2	0.879721	TRUE
cg00307066	chr4	1	TRUE
cg00308133	chr19	0	TRUE
cg00308503	chr5	1	TRUE
cg00308909	chr10	0.426885	TRUE
cg00308914	chr5	0.712399	TRUE
cg00309056	chr7	0.139845	TRUE
cg00309133	chr15	0.348175	TRUE
cg00309204	chr17	0	TRUE
cg00309402	chr4	0.676984	TRUE
cg00310257	chr3	1	TRUE
cg00310412	chr15	0.772447	TRUE
cg00310523	chr12	0.66253	TRUE
cg00311035	chr7	0.622819	TRUE
cg00311768	chr8	0.373343	TRUE
cg00311984	chr8	0	TRUE
cg00312474	chr1	0.0452721	TRUE
cg00312508	chr10	1	TRUE
cg00312919	chr7	0.203492	TRUE
cg00312921	chr4	0.221875	TRUE
cg00313106	chr1	0.507775	TRUE
cg00313685	chr7	1	TRUE
cg00313722	chr19	0.409694	TRUE
cg00313750	chr13	1	TRUE
cg00313876	chr13	0.417666	TRUE
cg00313981	chr1	0.315832	TRUE
cg00314622	chr3	0.984239	TRUE
cg00314660	chr2	0.995923	TRUE
cg00315239	chr16	0.752112	TRUE
cg00315394	chr5	0.367918	TRUE
cg00315563	chr3	1	TRUE
cg00316341	chr10	1	TRUE
cg00316759	chr15	0.835818	TRUE
cg00316921	chr8	1	TRUE
cg00317577	chr15	0.812809	TRUE
cg00317626	chr1	0.887276	TRUE
cg00317680	chr8	0	TRUE
cg00317886	chr13	1	TRUE
cg00318436	chr16	0.45478	TRUE
cg00318573	chr20	0	TRUE
cg00318865	chr12	0	TRUE
cg00318947	chr7	1	TRUE
cg00319168	chr2	0	TRUE
cg00319359	chr11	0	FALSE
cg00319692	chr8	1	TRUE
cg00319761	chr16	0	TRUE
cg00319774	chr8	0.435503	TRUE
cg00319912	chr19	0	TRUE
cg00320159	chr20	0.100212	TRUE
cg00320243	chr19	0	TRUE
cg00320980	chr10	1	TRUE
cg00321065	chr1	0	TRUE
cg00321288	chr12	0.968252	TRUE
cg00321478	chr1	0.317871	TRUE
cg00321850	chr1	0.0586564	TRUE
cg00321931	chr4	0	TRUE
cg00322262	chr4	1	TRUE
cg00322942	chr4	0.119702	TRUE
cg00322946	chr10	0	TRUE
cg00323014	chr10	0.994985	TRUE
cg00323305	chr3	0	TRUE
cg00323501	chr22	0.306986	TRUE
cg00323631	chr4	0	TRUE
cg00323915	chr7	0.899266	TRUE
cg00323916	chr22	0.219506	TRUE
cg00324097	chr17	0.329415	TRUE
cg00324108	chr4	1	TRUE
cg00324161	chr3	0.00965066	TRUE
cg00324438	chr16	0.641648	TRUE
cg00324520	chr15	0.838651	TRUE
cg00324733	chr11	0.0106597	TRUE
cg00325149	chr1	0	TRUE
cg00325491	chr11	1	TRUE
cg00325866	chr15	0.26938	TRUE
cg00325920	chr3	1	TRUE
cg00326231	chr22	0.301223	TRUE
cg00326251	chr8	0.533699	TRUE
cg00326259	chr5	0.471927	TRUE
cg00326813	chr8	0.637622	TRUE
cg00326908	chr8	0.473085	TRUE
cg00327185	chr11	0.327653	TRUE
cg00327524	chr8	0.0034602	TRUE
cg00328058	chr1	1	TRUE
cg00328219	chr8	0.865151	TRUE
cg00328376	chr7	0.507054	TRUE
cg00328729	chr11	0.231968	TRUE
cg00328740	chr3	1	TRUE
cg00328900	chr5	0	TRUE
cg00329052	chr4	0.364698	TRUE
cg00329270	chr3	0	TRUE
cg00329447	chr8	0	TRUE
cg00329618	chr12	0.00011389	TRUE
cg00330370	chr1	0.111965	TRUE
cg00330825	chr11	0.205423	TRUE
cg00330929	chr19	0.396166	TRUE
cg00331101	chr4	1	TRUE
cg00331237	chr12	0.243458	TRUE
cg00332153	chr4	0.0950878	TRUE
cg00332421	chr9	1	TRUE
cg00332680	chr10	0.109449	TRUE
cg00332745	chr16	0	TRUE
cg00332850	chr8	0.799555	TRUE
cg00333226	chr7	0	TRUE
cg00333483	chr17	0	TRUE
cg00333528	chr6	1	TRUE
cg00334177	chr6	0	TRUE
cg00334507	chr16	0.0783283	TRUE
cg00334691	chr15	0.987095	TRUE
cg00334976	chr20	0.962295	TRUE
cg00335286	chr18	1	TRUE
cg00335908	chr16	0	TRUE
cg00336149	chr3	1	TRUE
cg00336376	chr20	0.0238419	TRUE
cg00336605	chr19	0.070419	TRUE
cg00336700	chr2	0	TRUE
cg00336706	chr5	0.152352	TRUE
cg00337703	chr10	0.986962	TRUE
cg00337916	chr7	0.413764	TRUE
cg00338116	chr13	0	TRUE
cg00338702	chr12	0.254718	TRUE
cg00338928	chr2	0	TRUE
cg00339195	chr16	0.378004	TRUE
cg00339241	chr15	1	TRUE
cg00339331	chr19	0.689874	TRUE
cg00339441	chr10	0.239097	TRUE
cg00339695	chr16	0.907674	TRUE
cg00339913	chr8	0.470599	TRUE
cg00341935	chr8	1	TRUE
cg00342530	chr9	1	TRUE
cg00342532	chr19	0	TRUE
cg00343092	chr22	0	TRUE
cg00344260	chr12	0	TRUE
cg00344358	chr12	0	TRUE
cg00344380	chr4	0.583375	TRUE
cg00344411	chr3	1	TRUE
cg00344443	chr11	0	TRUE
cg00344577	chr17	0.202241	TRUE
cg00345443	chr3	0.0202697	TRUE
cg00345965	chr1	0.08448	TRUE
cg00346256	chr19	0.631119	TRUE
cg00346326	chr13	0.318054	TRUE
cg00346392	chr16	0.794881	TRUE
cg00346446	chr1	0.1112	TRUE
cg00346898	chr1	0.572876	TRUE
cg00346985	chr1	0.400344	TRUE
cg00347198	chr17	0	TRUE
cg00347369	chr8	0.0845953	TRUE
cg00347620	chr12	1	TRUE
cg00347775	chr22	1	TRUE
cg00347904	chr6	0.109832	TRUE
cg00348467	chr17	0.12139	TRUE
cg00348900	chr16	1	TRUE
cg00348992	chr1	0.505602	TRUE
cg00349925	chr13	1	TRUE
cg00349943	chr20	0	TRUE
cg00350003	chr17	0	TRUE
cg00350199	chr11	1	TRUE
cg00350296	chr11	0	TRUE
cg00350441	chr16	0	TRUE
cg00350448	chr11	0.924949	TRUE
cg00350478	chr6	1	TRUE
cg00350702	chr20	0	TRUE
cg00350931	chr4	0.887503	TRUE
cg00351011	chr19	0	TRUE
cg00351119	chr6	0.696593	TRUE
cg00351324	chr10	0.0433222	TRUE
cg00351813	chr17	0.648534	TRUE
cg00352106	chr1	0.42479	TRUE
cg00352576	chr9	0.497578	TRUE
cg00353112	chr15	0.0150353	TRUE
cg00353923	chr7	0.0948284	TRUE
cg00354542	chr16	0.414463	TRUE
cg00354572	chr12	0.235508	TRUE
cg00354641	chr6	0.93731	TRUE
cg00354884	chr17	0.209767	TRUE
cg00355281	chr7	0	TRUE
cg00355389	chr3	0.232672	TRUE
cg00355656	chr1	0.33365	TRUE
cg00355699	chr13	0.532975	TRUE
cg00355802	chr8	0	TRUE
cg00355829	chr3	1	TRUE
cg00355909	chr16	0	TRUE
cg00356183	chr7	0	TRUE
cg00356645	chr6	0.761926	TRUE
cg00356694	chr17	0.437324	TRUE
cg00356916	chr1	1	TRUE
cg00357273	chr6	0.286709	TRUE
cg00357958	chr12	0	TRUE
cg00358023	chr7	0.810929	TRUE
cg00358132	chr11	1	TRUE
cg00358278	chr16	0.69654	TRUE
cg00359181	chr2	0	TRUE
cg00359325	chr3	0	TRUE
cg00360256	chr12	0	TRUE
cg00360468	chr4	0	TRUE
cg00361017	chr6	1	TRUE
cg00363082	chr5	0.253333	TRUE
cg00363737	chr10	0.818519	TRUE
cg00363813	chr12	0	TRUE
cg00364287	chr12	0.360628	TRUE
cg00364339	chr3	1	TRUE
cg00364445	chr19	0.864645	TRUE
cg00364457	chr6	0.474133	TRUE
cg00364557	chr12	1	TRUE
cg00364758	chr7	0.585242	TRUE
cg00365524	chr1	0.111469	TRUE
cg00366103	chr7	0.275933	TRUE
cg00367281	chr8	1	TRUE
cg00368022	chr5	0	TRUE
cg00368059	chr10	0.154133	TRUE
cg00368415	chr1	0	TRUE
cg00368973	chr17	0.117435	TRUE
cg00369024	chr20	0.133694	TRUE
cg00369194	chr7	0.837922	TRUE
cg00369202	chr6	0	FALSE
cg00369376	chr2	0.187869	TRUE
cg00369414	chr16	0.330867	TRUE
cg00369640	chr2	0.203254	TRUE
cg00370022	chr15	0.417798	TRUE
cg00370608	chr16	0.368839	TRUE
cg00371134	chr1	1	TRUE
cg00371418	chr17	0	TRUE
cg00371627	chr7	0	TRUE
cg00371891	chr19	0	TRUE
cg00372375	chr8	0.440061	TRUE
cg00373020	chr1	1	TRUE
cg00373436	chr3	0.538633	TRUE
cg00373499	chr5	0	TRUE
cg00373616	chr1	0.325861	TRUE
cg00374333	chr2	0	TRUE
cg00374672	chr7	0.235005	TRUE
cg00375132	chr10	1	TRUE
cg00375939	chr3	0	FALSE
cg00375964	chr4	0.307692	TRUE
cg00375983	chr1	1	TRUE
cg00376553	chr7	0.350625	TRUE
cg00376625	chr10	0.08562	TRUE
cg00376639	chr19	0.0305344	TRUE
cg00376654	chr16	0.307579	TRUE
cg00376979	chr21	0.582459	TRUE
cg00377074	chr6	0.922834	TRUE
cg00377497	chr8	0.501157	TRUE
cg00377915	chr10	0.42572	TRUE
cg00378158	chr22	0.755889	TRUE
cg00378218	chr17	0	TRUE
cg00378292	chr9	1	TRUE
cg00378510	chr19	0	TRUE
cg00378658	chr11	1	TRUE
cg00379107	chr16	0	TRUE
cg00379559	chr16	0.838653	TRUE
cg00379619	chr19	0.706717	TRUE
cg00379733	chr3	1	TRUE
cg00380464	chr6	0	TRUE
cg00380780	chr6	0.6731	TRUE
cg00380835	chr19	0.390065	TRUE
cg00380860	chr3	0.41653	TRUE
cg00381057	chr19	0	TRUE
cg00381076	chr18	0	TRUE
cg00381442	chr16	1	TRUE
cg00381755	chr16	0.353938	TRUE
cg00382515	chr2	0.0389667	TRUE
cg00383220	chr11	0.319033	TRUE
cg00384537	chr17	1	TRUE
cg00384707	chr19	1	TRUE
cg00384847	chr1	0.766759	TRUE
cg00386008	chr12	1	TRUE
cg00386101	chr2	0.623206	TRUE
cg00386408	chr5	0.190457	TRUE
cg00386456	chr19	0	TRUE
cg00386725	chr1	0.182653	TRUE
cg00387090	chr1	0.776097	TRUE
cg00387115	chr12	0.527101	TRUE
cg00387445	chr1	0	TRUE
cg00387964	chr4	1	TRUE
cg00388154	chr15	0.426631	TRUE
cg00388605	chr1	0	TRUE
cg00388871	chr20	1	TRUE
cg00390143	chr12	0.728347	TRUE
cg00390259	chr13	0.846982	TRUE
cg00390511	chr7	1	TRUE
cg00390769	chr7	0.208494	TRUE
cg00391479	chr19	0.747691	TRUE
cg00391668	chr1	0.900072	TRUE
cg00392377	chr19	0	TRUE
cg00392832	chr3	0	TRUE
cg00393263	chr1	0.739833	TRUE
cg00393376	chr7	0	TRUE
cg00393487	chr3	1	TRUE
cg00393585	chr4	0.214347	TRUE
cg00393837	chr2	0	TRUE
cg00393992	chr12	0.697371	TRUE
cg00394221	chr1	1	TRUE
cg00394658	chr11	0.0629491	TRUE
cg00394823	chr16	0.855681	TRUE
cg00395501	chr1	0.309435	TRUE
cg00395697	chr12	0.176346	TRUE
cg00395894	chr19	0.198032	TRUE
cg00395931	chr1	0	TRUE
cg00395990	chr11	1	TRUE
cg00396427	chr16	1	TRUE
cg00396625	chr1	0	TRUE
cg00396687	chr15	0	TRUE
cg00396894	chr2	1	TRUE
cg00397283	chr19	0	TRUE
cg00397324	chr21	0	TRUE
cg00397422	chr17	1	TRUE
cg00397575	chr15	0.0389667	TRUE
cg00397635	chr1	0	TRUE
cg00397740	chr1	0	TRUE
cg00398048	chr4	0.139725	TRUE
cg00398276	chr7	0	TRUE
cg00398764	chr15	0.0582773	TRUE
cg00399295	chr16	1	TRUE
cg00399483	chr18	0	TRUE
cg00400221	chr8	0	TRUE
cg00400448	chr15	0.12255	TRUE
cg00400832	chr7	0	TRUE
cg00400987	chr16	1	TRUE
cg00401032	chr19	1	TRUE
cg00401091	chr20	0	TRUE
cg00401691	chr3	0.172349	TRUE
cg00401796	chr20	0.850883	TRUE
cg00401972	chr16	0.279076	TRUE
cg00405070	chr12	0	TRUE
cg00405190	chr2	0.0745136	TRUE
cg00405568	chr17	0.0296616	TRUE
cg00405677	chr5	0	TRUE
cg00405843	chr7	0	FALSE
cg00406392	chr10	0	TRUE
cg00406796	chr19	0	TRUE
cg00407062	chr9	0.463942	TRUE
cg00407150	chr3	0.383985	TRUE
cg00407468	chr9	0.379352	TRUE
cg00407537	chr16	0.859599	TRUE
cg00408773	chr1	0.7933	TRUE
cg00408964	chr2	0	TRUE
cg00409104	chr17	0.956929	TRUE
cg00409183	chr15	0	FALSE
cg00409684	chr10	0	TRUE
cg00409816	chr1	1	TRUE
cg00410034	chr22	0.307405	TRUE
cg00410419	chr13	0.200152	TRUE
cg00410576	chr15	0.329523	TRUE
cg00411072	chr17	0.488136	TRUE
cg00411097	chr7	0.393687	TRUE
cg00411697	chr11	0.623125	TRUE
cg00412772	chr19	0.518934	TRUE
cg00413089	chr7	0.97328	TRUE
cg00413617	chr11	0.0352664	TRUE
cg00413838	chr8	1	TRUE
cg00414041	chr6	1	TRUE
cg00414093	chr16	1	TRUE
cg00415011	chr8	0.961009	TRUE
cg00415333	chr6	1	TRUE
cg00415424	chr2	0.748811	TRUE
cg00415497	chr22	0	TRUE
cg00415582	chr6	0	TRUE
cg00415704	chr15	1	TRUE
cg00415978	chr4	0.526902	TRUE
cg00415993	chr5	0.879332	TRUE
cg00416176	chr1	0.125739	TRUE
cg00416386	chr2	1	TRUE
cg00416492	chr6	0.0803057	TRUE
cg00416645	chr2	0.294179	TRUE
cg00416882	chr18	0.565051	TRUE
cg00417094	chr1	0.687635	TRUE
cg00417151	chr20	0.342934	TRUE
cg00417297	chr3	0.0847449	TRUE
cg00417304	chr11	0.704384	TRUE
cg00417421	chr20	0	TRUE
cg00417424	chr5	0	FALSE
cg00417823	chr16	0.947728	TRUE
cg00418071	chr1	1	TRUE
cg00418146	chr1	0	TRUE
cg00418150	chr11	0.602502	TRUE
cg00418735	chr20	0.958724	TRUE
cg00419040	chr1	0	TRUE
cg00419159	chr10	1	TRUE
cg00419298	chr7	0.783164	TRUE
cg00419321	chr1	0.00505021	TRUE
cg00419564	chr1	0.542366	TRUE
cg00419604	chr2	0.688794	TRUE
cg00419702	chr22	0	FALSE
cg00420347	chr1	0.736176	TRUE
cg00420532	chr7	0.983406	TRUE
cg00420568	chr9	0	TRUE
cg00420715	chr8	0	TRUE
cg00420722	chr4	0.440804	TRUE
cg00420742	chr19	0.632129	TRUE
cg00420869	chr5	0.155789	TRUE
cg00420895	chr6	0.525149	TRUE
cg00420929	chr19	0.215743	TRUE
cg00420997	chr8	1	TRUE
cg00421089	chr17	1	TRUE
cg00421221	chr2	0.366896	TRUE
cg00421335	chr2	0.296396	TRUE
cg00421846	chr6	0	TRUE
cg00422120	chr2	0	TRUE
cg00422248	chr19	0	TRUE
cg00422488	chr9	0	TRUE
cg00422578	chr11	1	TRUE
cg00422638	chr10	0.587262	TRUE
cg00422913	chr17	0	TRUE
cg00423030	chr17	0.0301864	TRUE
cg00423114	chr1	1	TRUE
cg00423124	chr13	0	TRUE
cg00423597	chr1	1	TRUE
cg00423655	chr3	1	TRUE
cg00423729	chr5	0.604769	TRUE
cg00423811	chr7	1	TRUE
cg00423871	chr19	0.842643	TRUE
cg00423969	chr2	1	TRUE
cg00424169	chr13	0.141699	TRUE
cg00424946	chr16	0	TRUE
cg00424967	chr6	0.779789	TRUE
cg00425217	chr19	1	TRUE
cg00425431	chr15	0.585367	TRUE
cg00425710	chr16	0.574585	TRUE
cg00425792	chr17	0	TRUE
cg00425988	chr8	0	TRUE
cg00426056	chr6	0	TRUE
cg00426182	chr6	0.225448	TRUE
cg00426377	chr1	1	TRUE
cg00426498	chr17	0.321904	TRUE
cg00426517	chr4	0	TRUE
cg00426822	chr1	0.400612	TRUE
cg00426963	chr9	0	FALSE
cg00427086	chr15	0.363301	TRUE
cg00427635	chr15	0.995267	TRUE
cg00428296	chr1	0.784209	TRUE
cg00428568	chr11	0.511686	TRUE
cg00428598	chr17	0.691634	TRUE
cg00429683	chr17	1	TRUE
cg00429706	chr7	0.892887	TRUE
cg00430036	chr9	0.571076	TRUE
cg00430080	chr11	0.143907	TRUE
cg00430287	chr6	0.713776	TRUE
cg00430888	chr4	0.0366861	TRUE
cg00430945	chr19	0.30216	TRUE
cg00431050	chr10	0.151652	TRUE
cg00431114	chr20	0.136578	TRUE
cg00431324	chr16	0.363786	TRUE
cg00431447	chr16	0	TRUE
cg00431565	chr19	0	TRUE
cg00431813	chr7	1	TRUE
cg00431837	chr6	0	TRUE
cg00432937	chr7	0.957928	TRUE
cg00432979	chr13	0	TRUE
cg00433284	chr17	0	TRUE
cg00433861	chr18	0.459892	TRUE
cg00434573	chr19	0.515977	TRUE
cg00435006	chr16	0	TRUE
cg00435063	chr7	1	TRUE
cg00435305	chr10	0.122882	TRUE
cg00435526	chr11	0.249042	TRUE
cg00435528	chr7	0.850757	TRUE
cg00436174	chr2	0.0422969	TRUE
cg00436254	chr2	0.463555	TRUE
cg00436301	chr6	0.622197	TRUE
cg00436603	chr10	0.390834	TRUE
cg00437124	chr6	1	TRUE
cg00437411	chr15	0.821812	TRUE
cg00439089	chr17	0.710392	TRUE
cg00439384	chr3	0.44399	TRUE
cg00439658	chr17	0.0475698	TRUE
cg00439790	chr12	0.0920964	TRUE
cg00441382	chr15	0	TRUE
cg00441898	chr16	0.170266	TRUE
cg00442112	chr4	0.120989	TRUE
cg00442430	chr19	0	TRUE
cg00442931	chr3	0.384491	TRUE
cg00443645	chr14	0	TRUE
cg00443869	chr5	0.0361985	TRUE
cg00443946	chr16	0.879869	TRUE
cg00444019	chr10	0	TRUE
cg00444059	chr16	0.00179398	TRUE
cg00444390	chr11	0.917209	TRUE
cg00445232	chr15	0.715958	TRUE
cg00445405	chr2	0.146409	TRUE
cg00445443	chr7	0.288562	TRUE
cg00445475	chr9	0.163758	TRUE
cg00445566	chr5	0.398611	TRUE
cg00446211	chr6	0	TRUE
cg00446235	chr1	1	TRUE
cg00446697	chr11	0.749702	TRUE
cg00446966	chr19	0	TRUE
cg00447208	chr17	1	TRUE
cg00447970	chr17	0.207514	TRUE
cg00448560	chr16	0.204563	TRUE
cg00448659	chr7	0.435239	TRUE
cg00448720	chr13	1	TRUE
cg00448761	chr19	0.0506524	TRUE
cg00448814	chr6	0.300584	TRUE
cg00448868	chr16	0.537309	TRUE
cg00448875	chr3	0.653848	TRUE
cg00449000	chr9	0.78649	TRUE
cg00449189	chr22	1	TRUE
cg00449728	chr18	0.345018	TRUE
cg00449767	chr19	0.617952	TRUE
cg00449941	chr17	0.046353	TRUE
cg00450015	chr2	0.932639	TRUE
cg00450475	chr10	0.0102602	TRUE
cg00450695	chr19	0.704962	TRUE
cg00450784	chr12	0.0695668	TRUE
cg00450990	chr2	1	TRUE
cg00451039	chr1	0.219679	TRUE
cg00451105	chr13	0.679441	TRUE
cg00451635	chr16	0.25218	TRUE
cg00452039	chr7	0.197048	TRUE
cg00452257	chr19	0.338119	TRUE
cg00453193	chr7	0	TRUE
cg00453202	chr16	0.0607336	TRUE
cg00453258	chr10	1	TRUE
cg00453374	chr7	0.0551862	TRUE
cg00453864	chr19	1	TRUE
cg00454305	chr16	0.0537215	TRUE
cg00454734	chr7	0.955396	TRUE
cg00454997	chr1	0.699567	TRUE
cg00455402	chr19	0	TRUE
cg00455452	chr11	0	TRUE
cg00455796	chr19	0.84468	TRUE
cg00456216	chr1	1	TRUE
cg00456299	chr1	0.0717532	TRUE
cg00456582	chr6	0	TRUE
cg00456672	chr15	0.522932	TRUE
cg00456774	chr19	0.374004	TRUE
cg00457155	chr11	0.178881	TRUE
cg00457195	chr20	0.62029	TRUE
cg00457403	chr3	0.0769706	TRUE
cg00457913	chr6	0	TRUE
cg00458337	chr17	0.862716	TRUE
cg00458449	chr2	0.816091	TRUE
cg00459623	chr2	1	TRUE
cg00459816	chr17	0.61333	TRUE
cg00459909	chr2	1	TRUE
cg00459953	chr20	0	TRUE
cg00459975	chr8	0.0323377	TRUE
cg00460436	chr16	0	TRUE
cg00460795	chr2	0.673635	TRUE
cg00460983	chr10	0.851986	TRUE
cg00462107	chr5	0.48105	TRUE
cg00462311	chr14	0	TRUE
cg00462525	chr2	0.134066	TRUE
cg00462700	chr10	0.0929117	TRUE
cg00462994	chr17	0	TRUE
cg00463202	chr13	0.287424	TRUE
cg00463367	chr10	0.419085	TRUE
cg00463594	chr17	0.0654657	TRUE
cg00463732	chr17	1	TRUE
cg00463848	chr12	0.477376	TRUE
cg00463859	chr1	0	TRUE
cg00464946	chr1	1	TRUE
cg00465073	chr18	1	TRUE
cg00465247	chr13	0.120613	TRUE
cg00465250	chr2	0	TRUE
cg00465284	chr2	0.191637	TRUE
cg00465319	chr3	0.976676	TRUE
cg00466116	chr1	0.498316	TRUE
cg00466158	chr9	0	TRUE
cg00466249	chr17	0	TRUE
cg00466301	chr20	0	TRUE
cg00466334	chr1	0.955203	TRUE
cg00466425	chr6	1	TRUE
cg00466436	chr20	0	FALSE
cg00466492	chr19	0.803203	TRUE
cg00466544	chr14	0.376287	TRUE
cg00466839	chr4	0.617928	TRUE
cg00467326	chr19	0	TRUE
cg00468146	chr6	0	TRUE
cg00468380	chr8	0.316139	TRUE
cg00468400	chr8	0.783471	TRUE
cg00469635	chr11	0	TRUE
cg00469771	chr17	0.415569	TRUE
cg00470051	chr6	1	TRUE
cg00470277	chr7	1	TRUE
cg00471000	chr20	0.679488	TRUE
cg00471059	chr5	0.869242	TRUE
cg00471141	chr8	0.2761	TRUE
cg00471368	chr16	1	TRUE
cg00471645	chr2	0.0693106	TRUE
cg00472277	chr11	0.449507	TRUE
cg00472281	chr5	0.500374	TRUE
cg00472292	chr4	0.564951	TRUE
cg00472758	chr16	0.81857	TRUE
cg00472814	chr21	0	TRUE
cg00473031	chr19	0	TRUE
cg00473167	chr3	0.323709	TRUE
cg00473416	chr3	0	TRUE
cg00473462	chr5	0.137687	TRUE
cg00473597	chr19	0.531218	TRUE
cg00474004	chr9	0.770654	TRUE
cg00474209	chr6	0.0352664	TRUE
cg00474218	chr15	0.199706	TRUE
cg00474328	chr6	0.802141	TRUE
cg00474696	chr2	0.427957	TRUE
cg00475322	chr7	0	TRUE
cg00475509	chr3	0.0549319	TRUE
cg00475815	chr3	0	TRUE
cg00477086	chr2	1	TRUE
cg00477978	chr11	1	TRUE
cg00478246	chr2	0	TRUE
cg00478361	chr1	0	TRUE
cg00478442	chr6	0.527402	TRUE
cg00478479	chr19	0.418453	TRUE
cg00478601	chr2	1	TRUE
cg00478851	chr11	0	TRUE
cg00479411	chr11	0.433431	TRUE
cg00479986	chr19	0.375239	TRUE
cg00480115	chr19	0.449525	TRUE
cg00480209	chr17	0	TRUE
cg00480231	chr2	1	TRUE
cg00480331	chr3	0	TRUE
cg00480381	chr16	0.766269	TRUE
cg00481159	chr12	1	TRUE
cg00481350	chr4	0.153669	TRUE
cg00481600	chr15	0.589951	TRUE
cg00481629	chr22	0.830886	TRUE
cg00481644	chr15	0	TRUE
cg00481725	chr15	1	TRUE
cg00481951	chr3	0.0769706	TRUE
cg00482020	chr16	0.106181	TRUE
cg00483154	chr5	0.386035	TRUE
cg00483217	chr2	1	TRUE
cg00483304	chr2	0.385875	TRUE
cg00483503	chr17	0	TRUE
cg00483562	chr5	0.0262891	TRUE
cg00483893	chr11	0.680177	TRUE
cg00483990	chr17	0	TRUE
cg00484396	chr16	0.973209	TRUE
cg00485194	chr3	0	TRUE
cg00485201	chr10	1	TRUE
cg00485296	chr16	0	TRUE
cg00485748	chr20	0.545453	TRUE
cg00486113	chr6	0.698339	TRUE
cg00486143	chr7	0.97601	TRUE
cg00486564	chr2	0	TRUE
cg00487159	chr16	0	TRUE
cg00487506	chr8	1	TRUE
cg00487870	chr8	0.0608363	TRUE
cg00488514	chr22	0.0172056	TRUE
cg00488575	chr15	0.969565	TRUE
cg00488718	chr4	0	TRUE
cg00488747	chr16	1	TRUE
cg00489408	chr16	0.0611139	TRUE
cg00489652	chr12	0.408017	TRUE
cg00489660	chr11	0.58699	TRUE
cg00490583	chr16	0.663938	TRUE
cg00490655	chr2	0	FALSE
cg00491404	chr1	1	TRUE
cg00491412	chr2	0.291379	TRUE
cg00491548	chr19	0.381812	TRUE
cg00491603	chr19	1	TRUE
cg00491839	chr19	0	TRUE
cg00491963	chr11	0	TRUE
cg00492574	chr9	0.435603	TRUE
cg00492868	chr19	0	TRUE
cg00492873	chr1	0.41983	TRUE
cg00493314	chr2	1	TRUE
cg00493400	chr2	0.204904	TRUE
cg00493422	chr4	1	TRUE
cg00493831	chr1	0.0803789	TRUE
cg00494665	chr12	0	TRUE
cg00495415	chr12	0	TRUE
cg00495436	chr3	0.304897	TRUE
cg00495442	chr20	0.437059	TRUE
cg00495503	chr13	0.240323	TRUE
cg00495658	chr10	0.924931	TRUE
cg00495693	chr6	0.794827	TRUE
cg00495988	chr2	0.300841	TRUE
cg00496004	chr11	0	TRUE
cg00496026	chr10	0.382646	TRUE
cg00496170	chr14	0	TRUE
cg00496272	chr16	0.131057	TRUE
cg00496462	chr7	0.839305	TRUE
cg00496504	chr3	0.985827	TRUE
cg00496967	chr17	0.679418	TRUE
cg00497078	chr14	1	TRUE
cg00497251	chr2	0.713666	TRUE
cg00497554	chr2	0	TRUE
cg00497630	chr17	0	TRUE
cg00497735	chr16	0.69938	TRUE
cg00497905	chr11	1	TRUE
cg00498010	chr7	0.634495	TRUE
cg00498211	chr2	0.1583	TRUE
cg00498289	chr2	0.482204	TRUE
cg00498305	chr10	0.11244	TRUE
cg00498360	chr17	1	TRUE
cg00498804	chr11	0.930885	TRUE
cg00499210	chr11	0	TRUE
cg00499277	chr14	1	TRUE
cg00499289	chr2	0	TRUE
cg00499539	chr2	1	TRUE
cg00499700	chr5	0.15905	TRUE
cg00499723	chr12	0.411399	TRUE
cg00499726	chr17	0	TRUE
cg00499822	chr10	1	TRUE
cg00499837	chr11	0.110883	TRUE
cg00500227	chr10	0.867973	TRUE
cg00500428	chr16	0.382586	TRUE
cg00500481	chr6	0	TRUE
cg00500507	chr22	0.964383	TRUE
cg00500522	chr12	0	TRUE
cg00500936	chr12	0.0974648	TRUE
cg00501356	chr22	0.599061	TRUE
cg00501366	chr17	0.759766	TRUE
cg00501467	chr6	0.725537	TRUE
cg00501622	chr9	0.606597	TRUE
cg00501628	chr12	0	TRUE
cg00501711	chr20	0.406131	TRUE
cg00501876	chr3	0.264209	TRUE
cg00501904	chr1	0.51427	TRUE
cg00501919	chr6	1	TRUE
cg00502017	chr15	0.69498	TRUE
cg00502062	chr1	1	TRUE
cg00502099	chr11	0.106011	TRUE
cg00502190	chr1	0	TRUE
cg00502442	chr6	0	TRUE
cg00502444	chr7	1	TRUE
cg00502576	chr13	1	TRUE
cg00502597	chr1	0.964974	TRUE
cg00502932	chr1	0	TRUE
cg00502963	chr1	0	TRUE
cg00503298	chr1	0.749036	TRUE
cg00503840	chr7	0	TRUE
cg00504034	chr13	0	TRUE
cg00504410	chr16	0.63514	TRUE
cg00504595	chr13	0.929846	TRUE
cg00504782	chr1	0.640566	TRUE
cg00505277	chr19	0	TRUE
cg00505318	chr3	0	TRUE
cg00505502	chr9	0	TRUE
cg00506247	chr5	0	TRUE
cg00506866	chr2	0.0847996	TRUE
cg00506886	chr19	0.668109	TRUE
cg00507945	chr5	0.506199	TRUE
cg00508526	chr4	0.749476	TRUE
cg00508697	chr9	0	TRUE
cg00508855	chr5	0.030825	TRUE
cg00508975	chr3	0.518202	TRUE
cg00509136	chr19	0.991762	TRUE
cg00509616	chr15	1	TRUE
cg00509670	chr14	0.434195	TRUE
cg00509772	chr20	0.567607	TRUE
cg00509996	chr4	0	FALSE
cg00510160	chr12	1	TRUE
cg00510331	chr3	0.387543	TRUE
cg00510360	chr3	0	TRUE
cg00510437	chr12	0.581935	TRUE
cg00510447	chr16	0	TRUE
cg00510787	chr6	0.127542	TRUE
cg00510870	chr8	0	TRUE
cg00511334	chr16	0.383593	TRUE
cg00511475	chr16	0	TRUE
cg00511674	chr16	0.0812068	TRUE
cg00512279	chr10	0	TRUE
cg00512280	chr19	0.396166	TRUE
cg00512374	chr17	0	FALSE
cg00512454	chr6	1	TRUE
cg00512726	chr15	0	TRUE
cg00513060	chr19	0	TRUE
cg00513169	chr10	1	TRUE
cg00513288	chr19	0.198828	TRUE
cg00513467	chr9	0.4263	TRUE
cg00514407	chr2	0.293401	TRUE
cg00514413	chr19	0	TRUE
cg00514486	chr3	0	FALSE
cg00514575	chr5	0	FALSE
cg00514609	chr11	0	TRUE
cg00514628	chr22	0	TRUE
cg00514713	chr7	1	TRUE
cg00515455	chr6	1	TRUE
cg00516067	chr20	0	TRUE
cg00516481	chr21	0.1583	TRUE
cg00516513	chr4	0.248379	TRUE
cg00516639	chr7	0.0437883	TRUE
cg00516678	chr7	0.806599	TRUE
cg00516966	chr17	0.787246	TRUE
cg00517072	chr1	0.728094	TRUE
cg00517261	chr12	0.832993	TRUE
cg00517270	chr15	0.655451	TRUE
cg00518190	chr1	0.227803	TRUE
cg00518266	chr6	0.130178	TRUE
cg00518276	chr11	1	TRUE
cg00518941	chr2	0.657744	TRUE
cg00518989	chr22	0.00277696	TRUE
cg00519069	chr19	0.0792604	TRUE
cg00519627	chr16	0	TRUE
cg00520380	chr22	0.801777	TRUE
cg00520612	chr3	0.318537	TRUE
cg00521239	chr8	0.178806	TRUE
cg00521255	chr5	0.177921	TRUE
cg00521588	chr5	0	TRUE
cg00522034	chr3	0	TRUE
cg00522048	chr10	0.480546	TRUE
cg00522231	chr2	0.0196858	TRUE
cg00522316	chr19	0	TRUE
cg00522579	chr18	1	TRUE
cg00522588	chr12	0.779995	TRUE
cg00522893	chr2	0	TRUE
cg00523012	chr19	0	TRUE
cg00523161	chr2	0.379423	TRUE
cg00523241	chr16	0.864155	TRUE
cg00523742	chr17	0	FALSE
cg00524108	chr19	0.133108	TRUE
cg00524220	chr19	0.0305344	TRUE
cg00524443	chr17	0.436207	TRUE
cg00524706	chr12	0.831567	TRUE
cg00524708	chr16	0.624318	TRUE
cg00524963	chr1	0.837943	TRUE
cg00525011	chr16	0	TRUE
cg00525681	chr13	0.290759	TRUE
cg00525823	chr18	0	TRUE
cg00526316	chr1	0	TRUE
cg00526772	chr10	1	TRUE
cg00527440	chr2	0.142085	TRUE
cg00528052	chr1	0	TRUE
cg00528549	chr11	0	TRUE
cg00528572	chr11	0.305302	TRUE
cg00528616	chr16	0.742289	TRUE
cg00528967	chr13	0	TRUE
cg00529053	chr6	0	TRUE
cg00529946	chr2	0	TRUE
cg00530414	chr16	0.753104	TRUE
cg00530438	chr7	0.627549	TRUE
cg00530564	chr12	0.413347	TRUE
cg00530650	chr7	1	TRUE
cg00531745	chr6	0.121029	TRUE
cg00532335	chr10	0.633557	TRUE
cg00532411	chr1	0.266158	TRUE
cg00532449	chr1	0.12139	TRUE
cg00532998	chr13	0.103297	TRUE
cg00533393	chr11	0	TRUE
cg00533407	chr7	0.452365	TRUE
cg00533891	chr10	0	TRUE
cg00533923	chr6	0	TRUE
cg00534163	chr1	1	TRUE
cg00534255	chr1	1	TRUE
cg00534274	chr4	0.229671	TRUE
cg00534318	chr3	0.438649	TRUE
cg00534655	chr5	0.342513	TRUE
cg00535027	chr4	0.633468	TRUE
cg00535618	chr1	0.932746	TRUE
cg00535683	chr1	0.665608	TRUE
cg00536366	chr22	0.543567	TRUE
cg00536792	chr6	0.628936	TRUE
cg00536910	chr8	0.961981	TRUE
cg00537673	chr6	0	TRUE
cg00537837	chr16	0.145997	TRUE
cg00538147	chr10	0.344651	TRUE
cg00538212	chr7	0.553052	TRUE
cg00538381	chr2	0.227444	TRUE
cg00538923	chr17	0.808699	TRUE
cg00539154	chr1	0.921147	TRUE
cg00539347	chr22	0.820671	TRUE
cg00539716	chr2	0	TRUE
cg00540067	chr3	0.18074	TRUE
cg00540544	chr1	0	TRUE
cg00540558	chr19	0.33746	TRUE
cg00541303	chr1	1	TRUE
cg00541476	chr8	0.469128	TRUE
cg00541479	chr1	0.155424	TRUE
cg00541544	chr22	0.872649	TRUE
cg00542992	chr5	0.821741	TRUE
cg00543364	chr21	0.495094	TRUE
cg00543406	chr1	0	TRUE
cg00543769	chr5	0.915207	TRUE
cg00545462	chr20	0.854423	TRUE
cg00545705	chr1	1	TRUE
cg00545916	chr17	0	FALSE
cg00546248	chr1	0.702401	TRUE
cg00546491	chr7	0.206976	TRUE
cg00546897	chr21	1	TRUE
cg00546932	chr16	1	TRUE
cg00547365	chr1	1	TRUE
cg00547441	chr7	0.0909181	TRUE
cg00547484	chr1	0.273201	TRUE
cg00548098	chr16	0.550158	TRUE
cg00548143	chr1	0	TRUE
cg00548268	chr7	0.10477	TRUE
cg00548708	chr17	0.0947328	TRUE
cg00548822	chr11	0.419694	TRUE
cg00548911	chr17	0.502888	TRUE
cg00549064	chr16	0.0227657	TRUE
cg00549412	chr21	1	TRUE
cg00549450	chr10	0.861073	TRUE
cg00549451	chr1	0.00654991	TRUE
cg00549561	chr16	0.830882	TRUE
cg00549601	chr12	0.0820329	TRUE
cg00549896	chr2	0.164161	TRUE
cg00549972	chr6	1	TRUE
cg00550340	chr17	0.41897	TRUE
[truncated: 76,466 more rows]
